# Supplementary material for: Outcomes of Patients with Positive Interim Positron Emission Tomography (PET) Continuing ABVD in the Clinical Setting
Source: MDPI journal article supplement (doi:10.3390/cancers15061760), 2023-03-14

# Supplementary Material

# Supp. table S1 - Selected studies reporting PET2 on ABVD

| Study                      | N    | PET2+ (% , n)                | Treatment failure PET2+<br>(POD + PR + SD) | 3y PFS PET2- | 3y PFS PET2+                 |                        | Comment*                                                                                                                                |
|----------------------------|------|------------------------------|--------------------------------------------|--------------|------------------------------|------------------------|-----------------------------------------------------------------------------------------------------------------------------------------|
| Gallamini (2007)           | 260  | 19%*                         | 88%                                        | 2yPFS 95%*   | 13%                          |                        | 2y PFS (not 3y)<br>PET2+ by IHP (~Deauville >2)                                                                                         |
| Biggi (2013)               | 260  | 17% (45)                     | NA                                         | 95%*         | Central<br>review<br>28%     | Local<br>review<br>54% | FFS <u>NOT</u> PFS; 25% of PET2+ were FP<br>Excluded pts. w/ escalation based on PET2<br>8 patients (3+) w/o consensus were PET2+       |
| Oki (2014)                 | 174  | 17%                          | NA                                         | 83%          | ~48%                         |                        |                                                                                                                                         |
| Zinzani (2012)             | 304  | 22%                          | 62%                                        | NA           | ~40%*                        |                        | Patient with EOT PET PR to further therapy w/o<br>biopsy = event                                                                        |
| Johnson (2016)<br>RATHL    | 1119 | 16% (160)                    | 25% *<br>(on escBEACOPP)                   | 85%          | 68%<br>(on escBEACOPP)       |                        | 24 pts. Received further chemo for consolidation<br>after escBEACOPP and 43 RT                                                          |
| Zinzani (2016)<br>HD0801   | 512  | 20% (103)*<br>14% DV >3 (72) | 50%                                        | 2yPFS 81%    | 2yPFS 76%<br>(IGEV+ASCT)     |                        | 30% of PET2+ cases that went to intensive<br>treatment were actually Deauville 3<br>15 PET2+ continued ABVD with 73% CR                 |
| Press (2016)<br>SWOG S0816 | 331  | 18% (61)                     | 45%*<br>(on escBEACOPP)                    | 2yPFS 82%    | 2yPFS 64%<br>(on escBEACOPP) |                        | 38% PET-PR data not provided on RT additional<br>therapy; 7% SD/UNK                                                                     |
| Straus (2021)<br>ECHELON-1 | 636  | 9%                           | NA                                         | 3yPFS 76%    | 3yPFS 55%*                   |                        | Censoring mPFS at the modified event may have<br>caused an underestimation of PFS. 5y-PFS<br>recently published down to 46%             |
| <b>MSK</b>                 | 227  | 14%/25%                      | 13%                                        | 86%          | 64%*<br>(by dvPET2+)         |                        | If we were to include transition to escBEACOPP as<br>event (PFS 23% if all cases = events<br>PFS 61% if only POD on escBEACOPP = event) |

# Supp. figure S1 - CONSORT – Response and use of radiotherapy

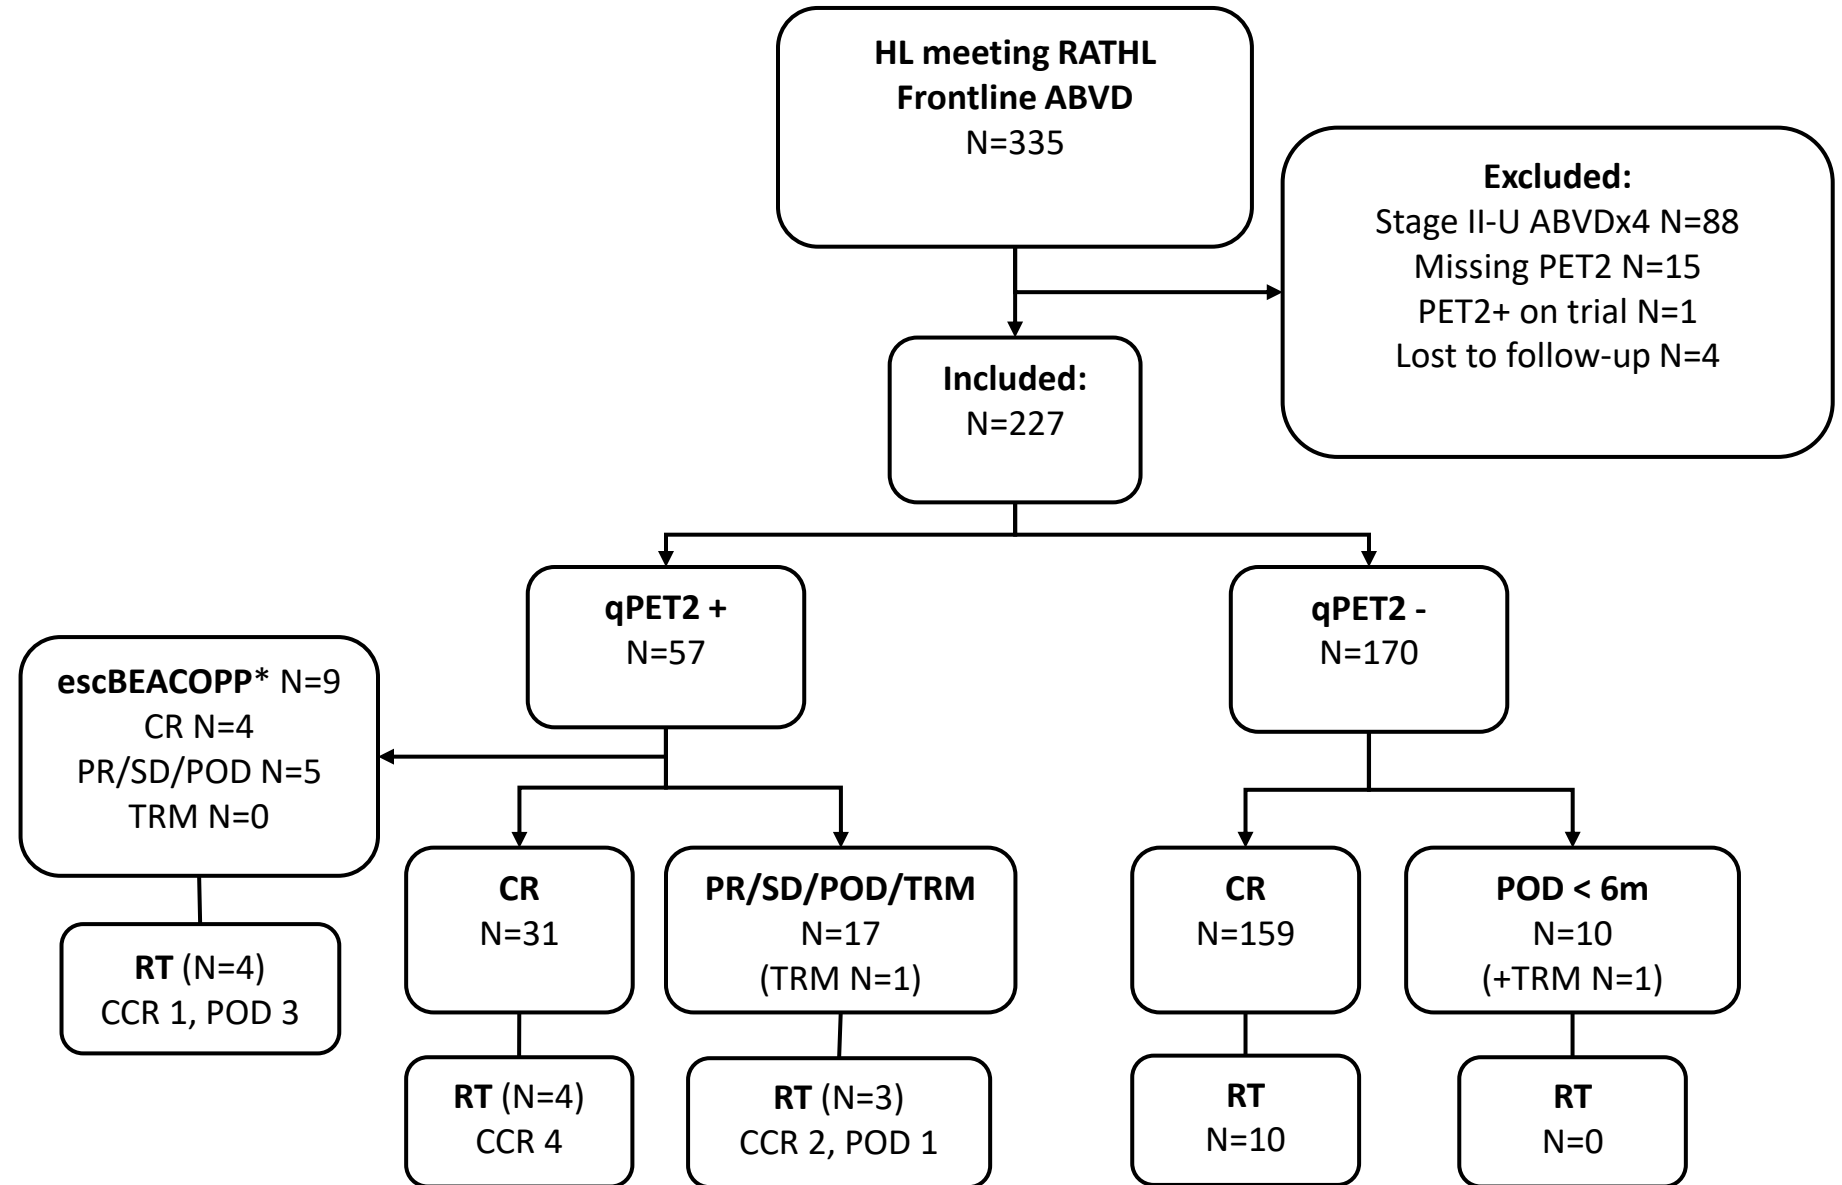

# Images and clinical data of interim PET+ cases (qPET2+ and/or dvPET2+)

Images are ordered from left to right  
Diagnosis – Interim – End of Therapy – [subsequent scans]

# Abbreviations

- qPET2+ - lesion SUVmax to liver SUVmean  $\geq 1.3$
- dvPET2+ - Deauville score 4-5
- OSH – imaging loaded only to main radiology system (not available for download)
- POD – Progression of disease
- Tx 2 – second line treatment
- IPS – International prognostic score
- SUV ratio – lesion SUVmax to liver SUVmean
- SUV – SUV max @ lesion
- Liver – SUVmean @ liver
- Response – by imaging prior to any radiotherapy (imaging PR with negative biopsy or no progression on short follow-up -> CR)
- RT – radiotherapy after frontline therapy
- RT resp – response after radiotherapy
- Rel prev site – relapse at site of initial diagnosis
- Bx confirmed – was biopsy done to confirm relapse

escBEACOPP  
Patients with POD

| MRN | Age | IPS | Escalated | Cycles | SUV Ratio  | Deauville | SUV | Liver | Response | RT | RT resp | Relapse | PFS | Death | OS | Rel prev site | Bx confirmed |
|-----|-----|-----|-----------|--------|------------|-----------|-----|-------|----------|----|---------|---------|-----|-------|----|---------------|--------------|
|     | 53  | 4-7 | BEACOPP   | 6      | $\geq 1.3$ | $\geq 4$  | 10  | 1.8   | PR       | 1  | POD     | 1       | 12  | 0     | 40 | 1             | 1            |

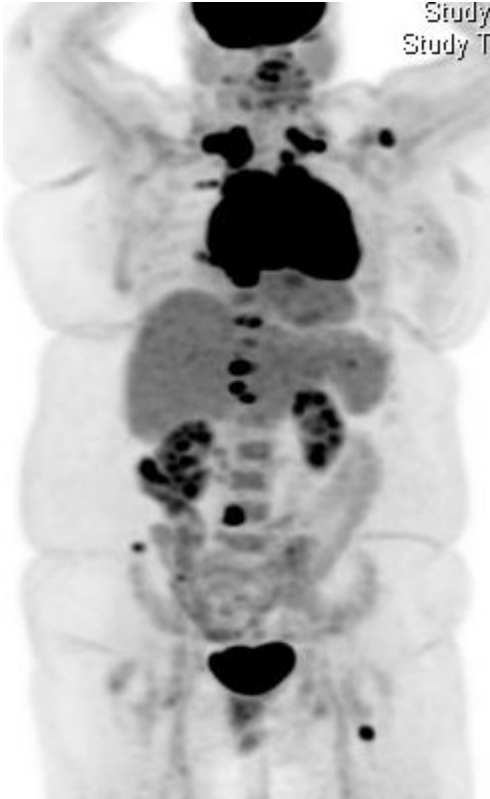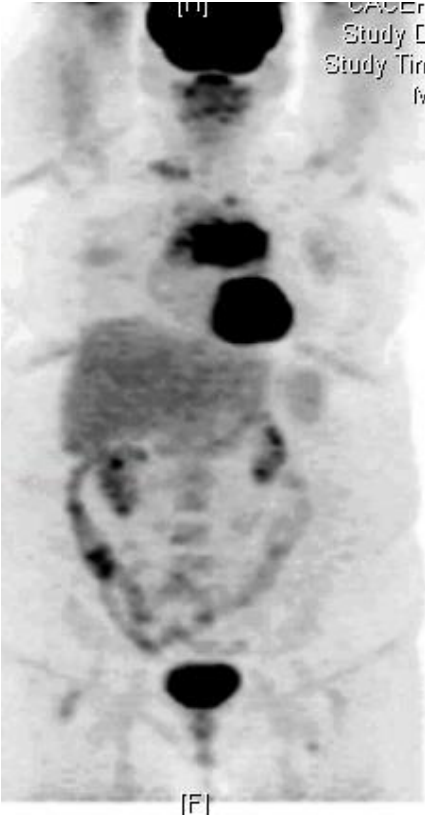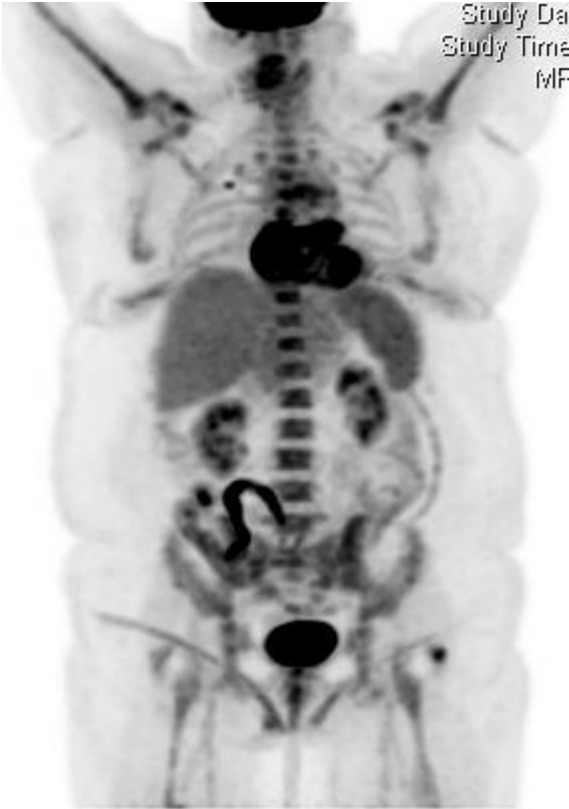

|               |
|---------------|
| Tx-2          |
| BV-ICE - ASCT |

| MRN | Age | IPS | Escalated | Cycles | SUV Ratio | Deauville | SUV | Liver | Response | RT | RT resp | Relapse | PFS | Death | OS | Rel prev site | Bx confirmed |
|-----|-----|-----|-----------|--------|-----------|-----------|-----|-------|----------|----|---------|---------|-----|-------|----|---------------|--------------|
|     | 36  | 0-1 | BEACOPP   | 6      | >=1.3     | >=4       | 5.2 | 2.3   | POD      | 0  |         | 1       | 7   | 0     | 35 | 1             | 1            |

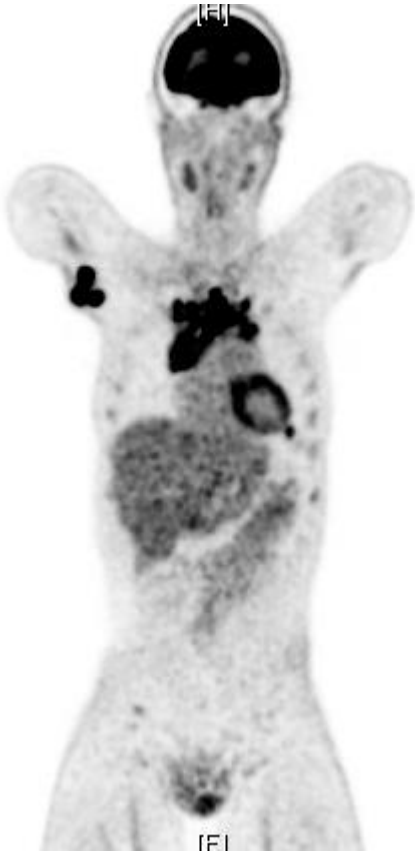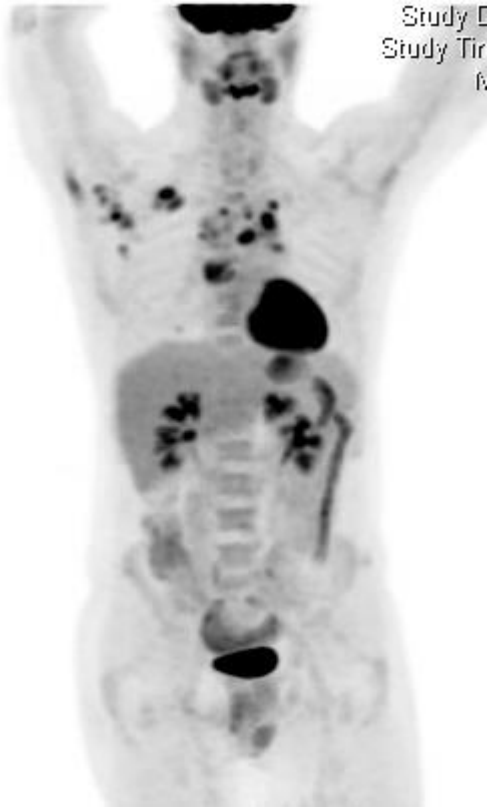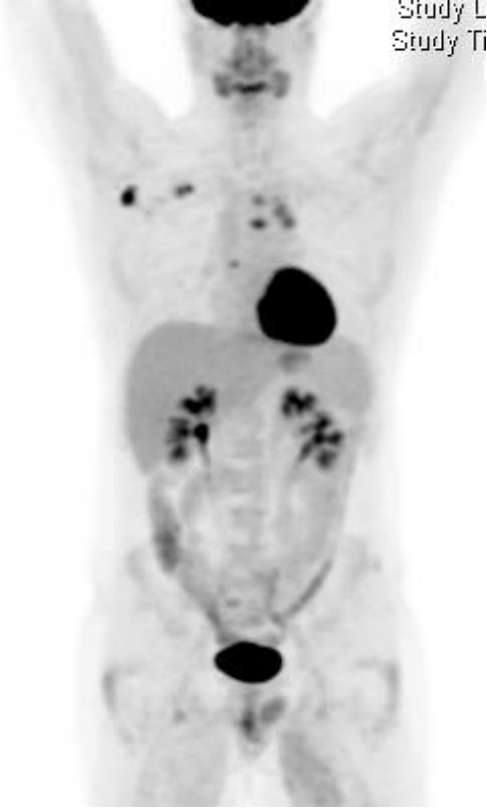

|                 |
|-----------------|
| Tx-2            |
| BV + RT -> ASCT |



| MRN | Age | IPS | Escalated | Cycles | SUV Ratio | Deauville | SUV | Liver | Response | RT | RT resp | Relapse | PFS | Death | OS | Rel prev site | Bx confirmed |
|-----|-----|-----|-----------|--------|-----------|-----------|-----|-------|----------|----|---------|---------|-----|-------|----|---------------|--------------|
|     | 21  | 0-1 | BEACOPP   | 6      | >=1.3     | >=4       | 9   | 1.55  | POD      | 1  | POD     | 1       | 10  | 0     | 90 | 1             | 1            |

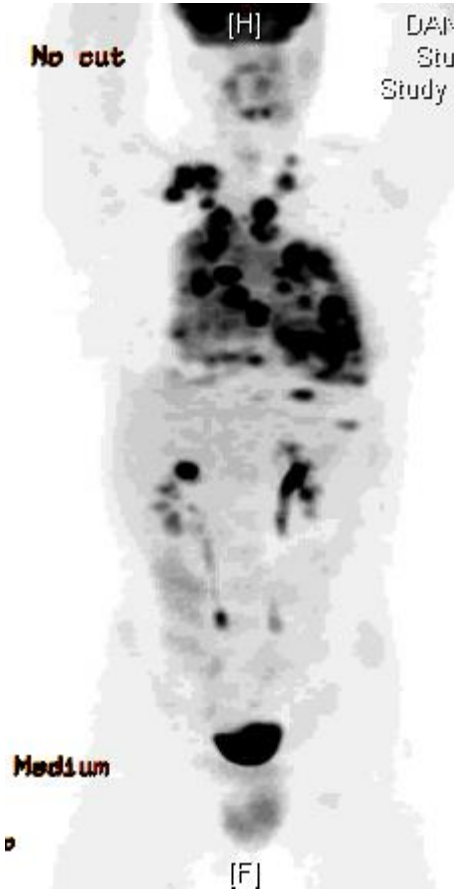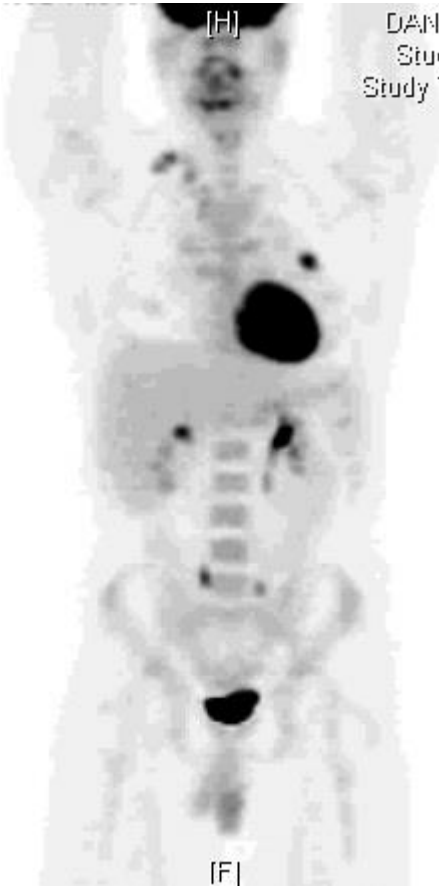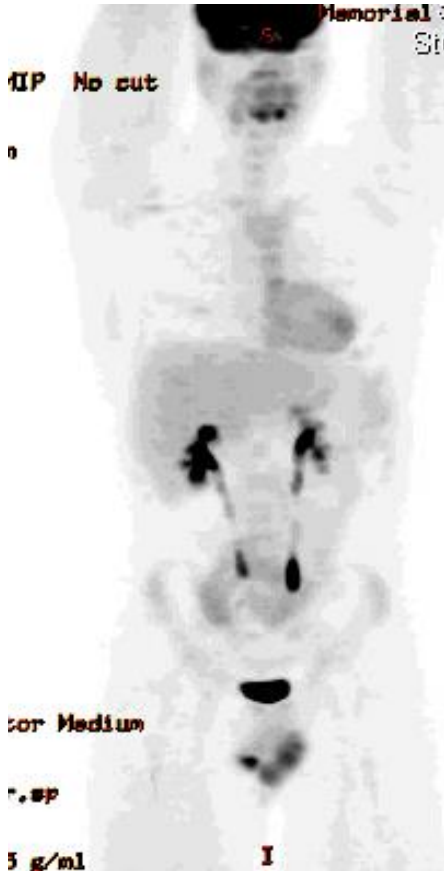

EOT

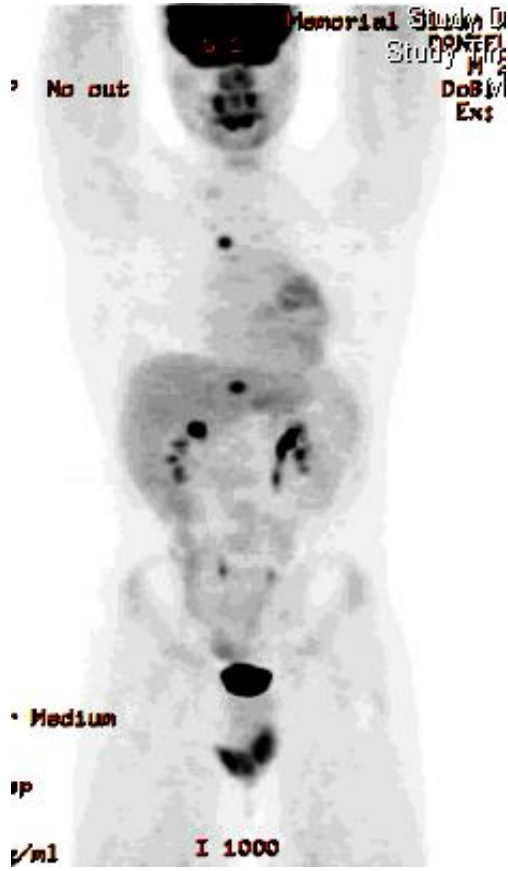

Relapsed w/in 6 mo

| MRN | Age | IPS | Escalated | Cycles | SUV Ratio | Deauville | SUV | Liver | Response | RT | RT resp | Relapse | PFS | Death | OS | Rel prev site | Bx confirmed |
|-----|-----|-----|-----------|--------|-----------|-----------|-----|-------|----------|----|---------|---------|-----|-------|----|---------------|--------------|
|     | 25  | 0-1 | BEACOPP   | 6      | >=1.3     | >=4       | 7.8 | 1.63  | POD      | 1  | POD     | 1       | 9   | 0     | 27 | 1             | 1            |

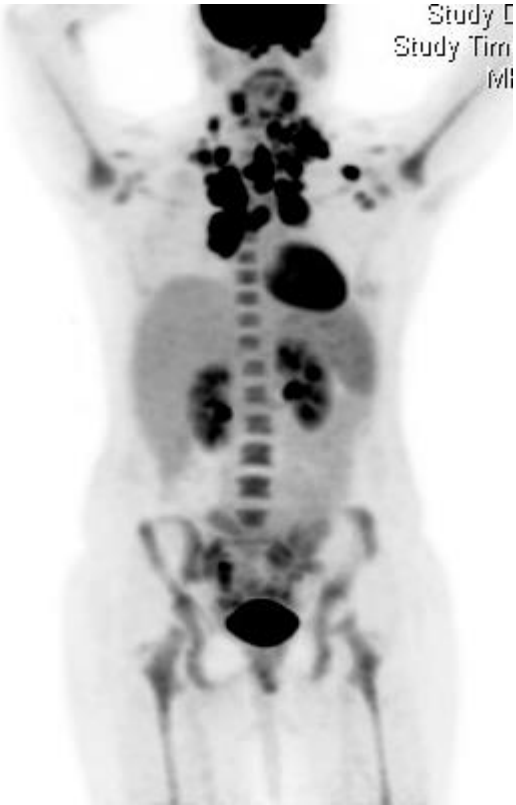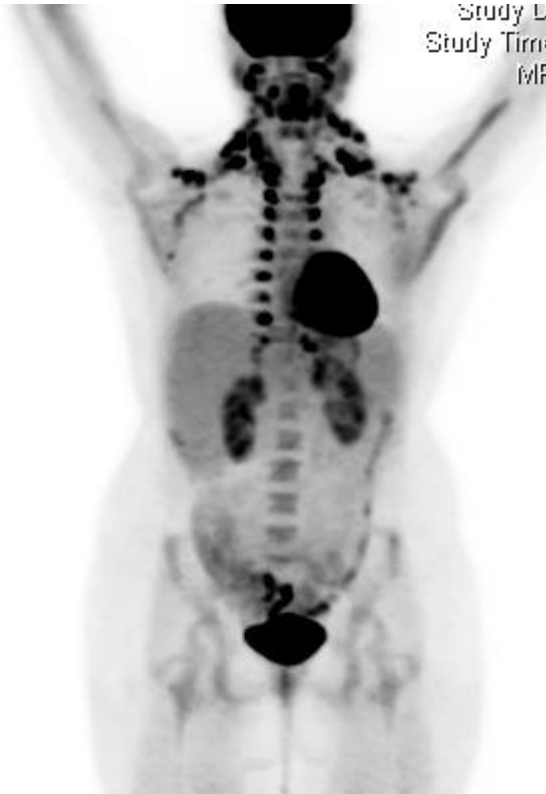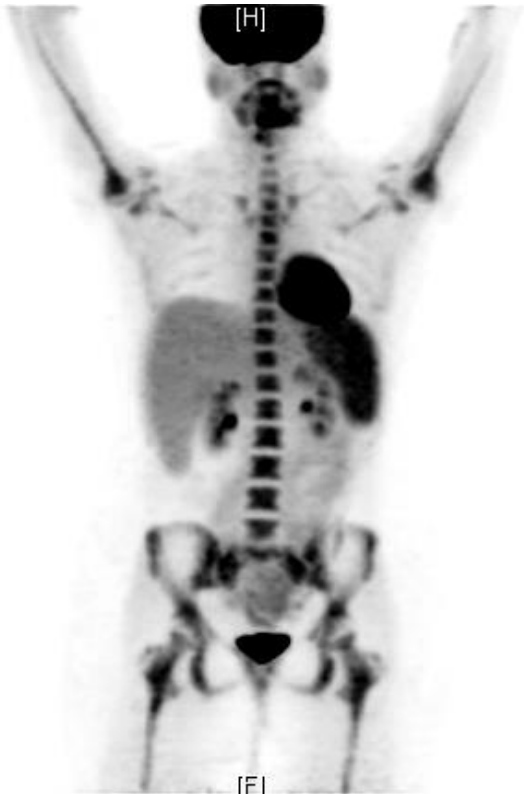

EOT CR

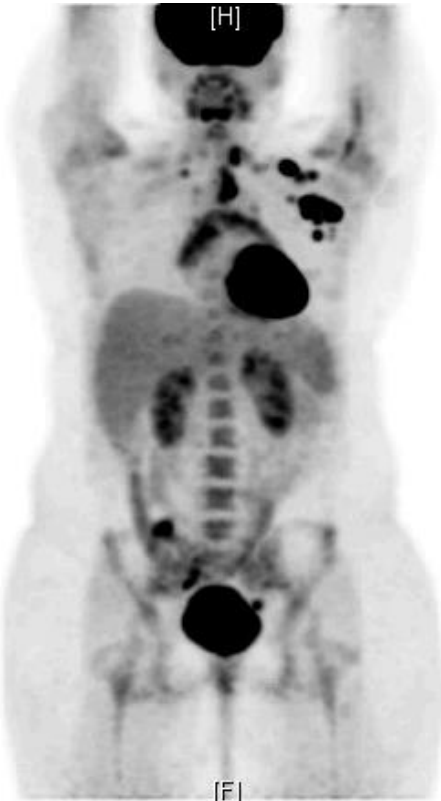

Relapsed within 5 mo

|               |
|---------------|
| Tx-2          |
| BV-ICE - ASCT |

| MRN | Age | IPS | Escalated | Cycles | SUV Ratio | Deauville | SUV | Liver | Response | RT | RT resp | Relapse | PFS | Death | OS | Rel prev site | Bx confirmed |
|-----|-----|-----|-----------|--------|-----------|-----------|-----|-------|----------|----|---------|---------|-----|-------|----|---------------|--------------|
|     | 50  | 2-3 | BEACOPP   | 6      | >=1.3     | >=4       | 5   | 2.78  | CR       | 0  |         | 1       | 39  | 0     | 99 | 1             | 1            |

OSH

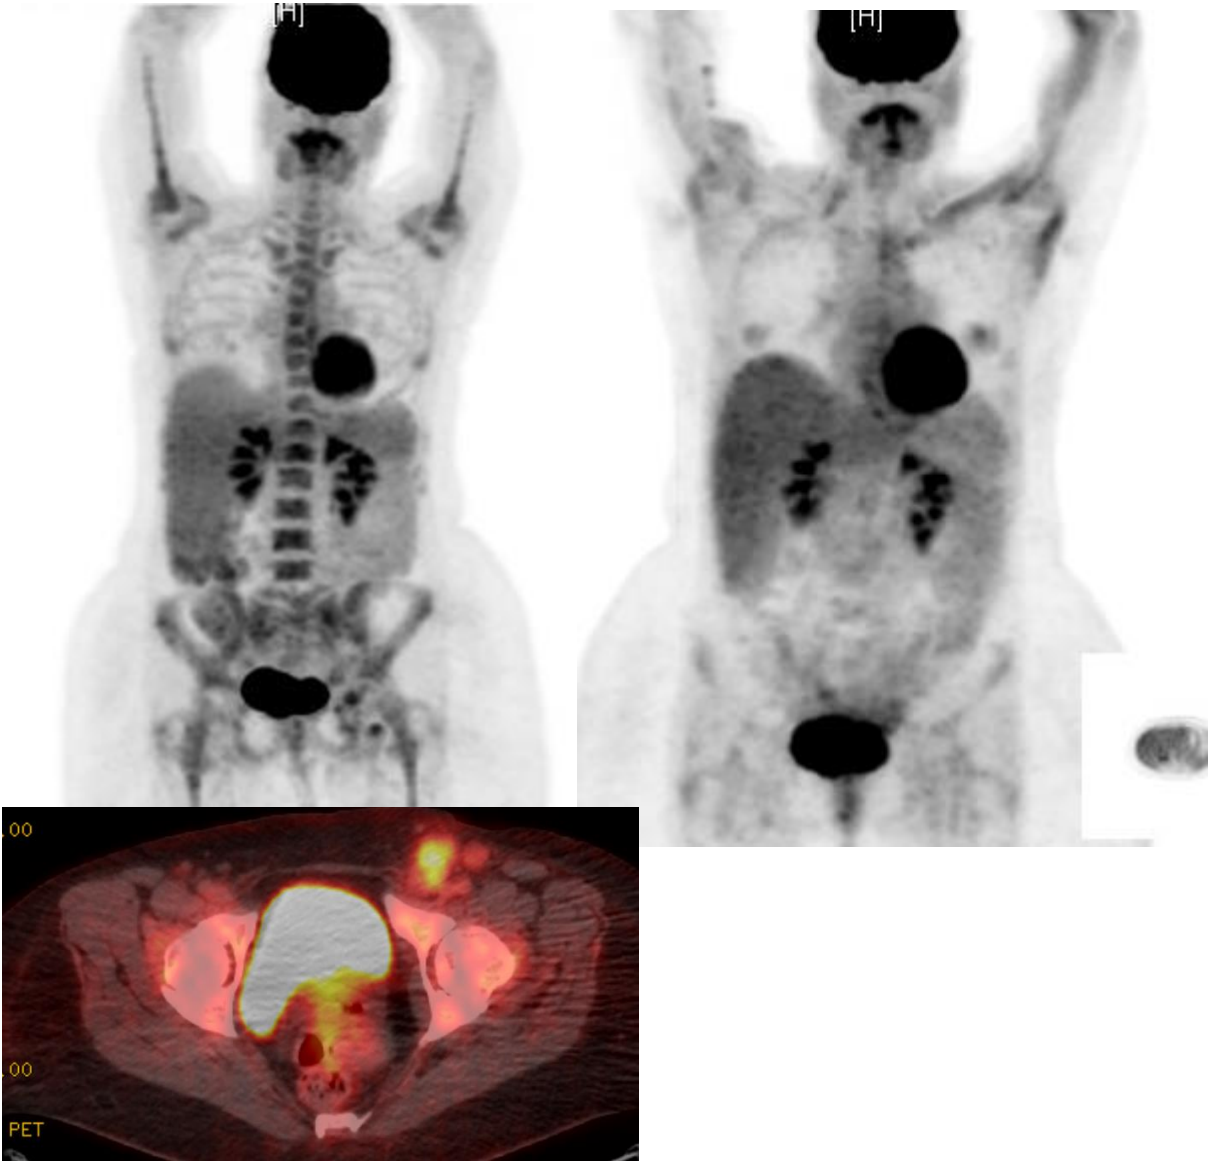

Note: relapse after 39m

|                    |
|--------------------|
| Tx-2               |
| BV + RT -> alloSCT |

escBEACOPP

Patients with long-term remission

| MRN | Age | IPS | Escalated | Cycles | SUV Ratio       | Deauville     | SUV | Liver | Response | RT | RT resp | Relapse  | PFS       | Death | OS | Rel prev site | Bx confirmed |
|-----|-----|-----|-----------|--------|-----------------|---------------|-----|-------|----------|----|---------|----------|-----------|-------|----|---------------|--------------|
|     | 19  | 0-1 | BEACOPP   | 6      | <b>&gt;=1.3</b> | <b>&gt;=4</b> | 8   | 2.4   | CR       | 0  |         | <b>0</b> | <b>63</b> | 0     | 63 |               |              |

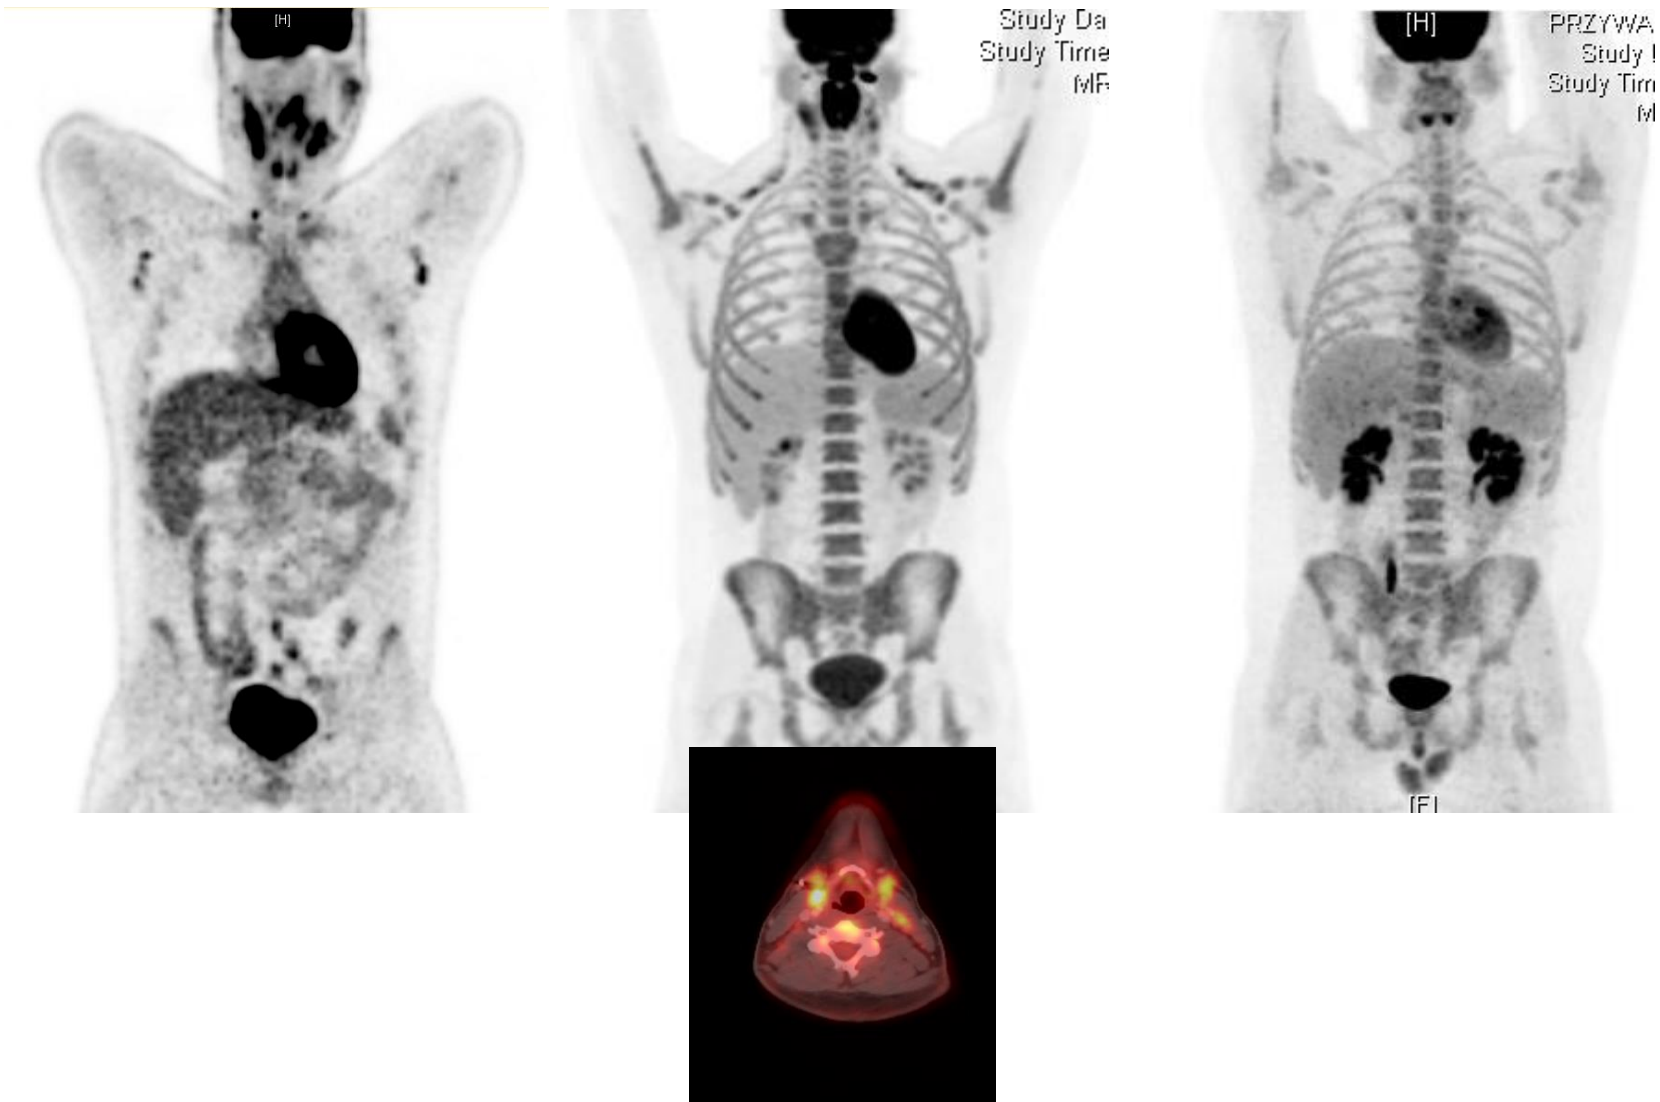

| MRN | Age | IPS | Escalated | Cycles | SUV Ratio | Deauville | SUV | Liver | Response | RT | RT resp | Relapse | PFS | Death | OS | Rel prev site | Bx confirmed |
|-----|-----|-----|-----------|--------|-----------|-----------|-----|-------|----------|----|---------|---------|-----|-------|----|---------------|--------------|
|     | 59  | 4-7 | BEACOPP   | 8      | >=1.3     | >=4       | 5.2 | 2.3   | CR       | 0  |         | 0       | 24  | 0     | 24 |               |              |

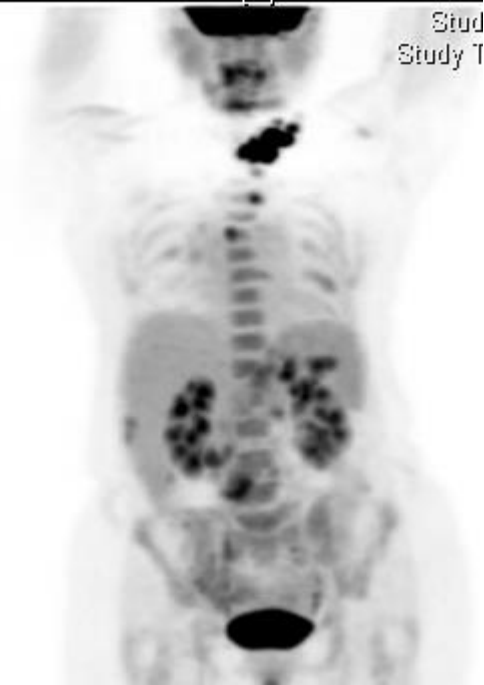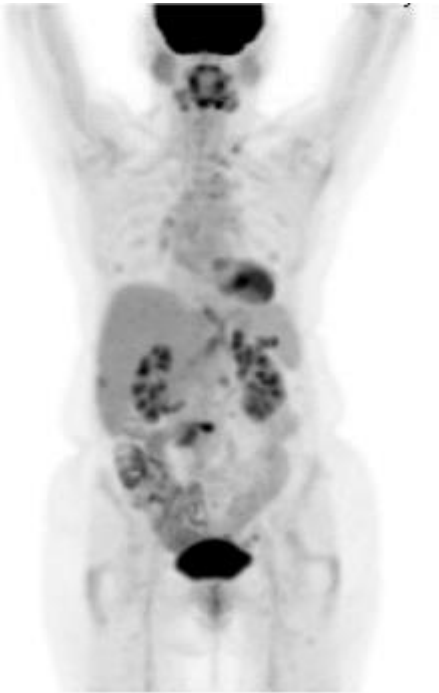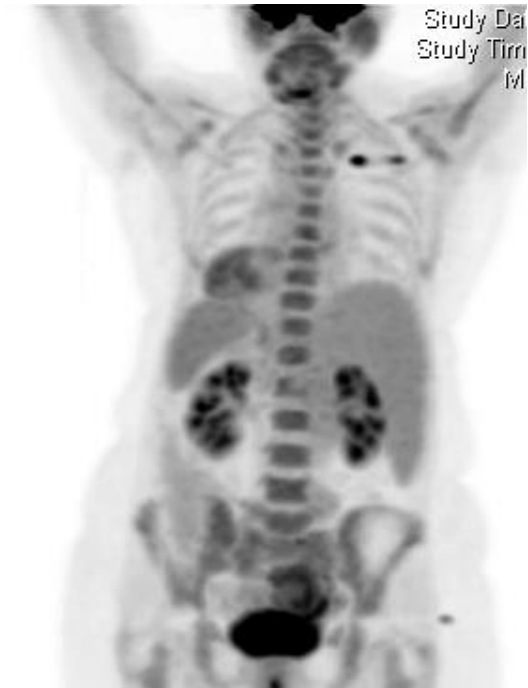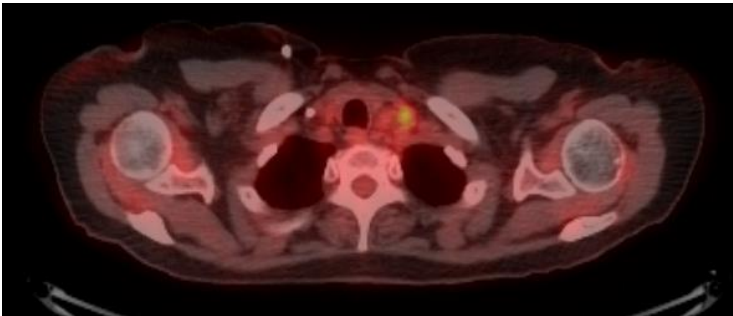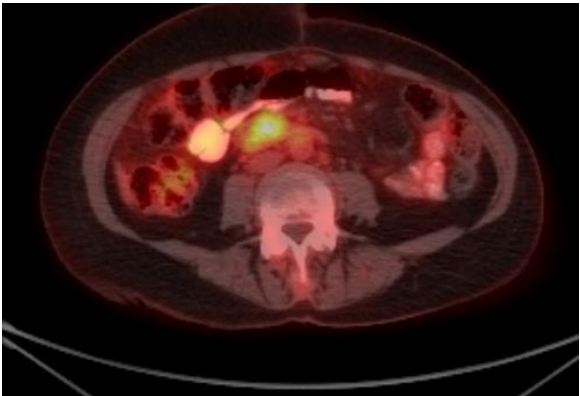



| MRN | Age | IPS | Escalated | Cycles | SUV Ratio | Deauville | SUV | Liver | Response | RT | RT resp | Relapse | PFS | Death | OS | Rel prev site | Bx confirmed |
|-----|-----|-----|-----------|--------|-----------|-----------|-----|-------|----------|----|---------|---------|-----|-------|----|---------------|--------------|
|     | 19  | 2-3 | BEACOPP   | 5      | >=1.3     | >=4       | 6.4 | 2.1   | PR       | 1  | CR      | 0       | 35  | 0     | 35 |               |              |

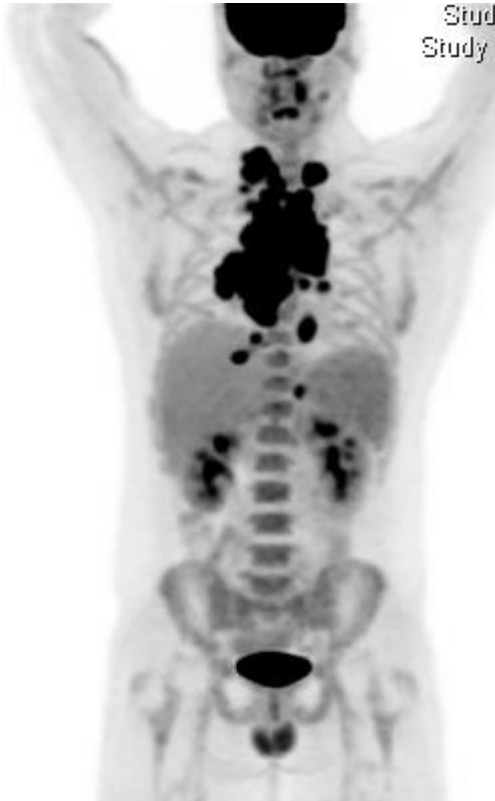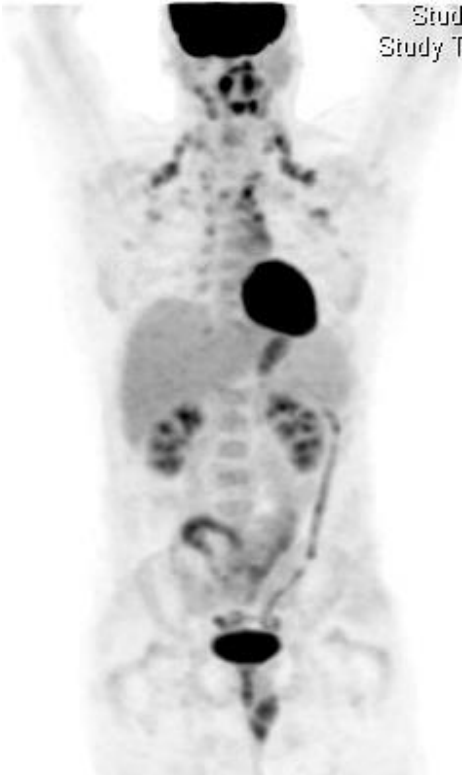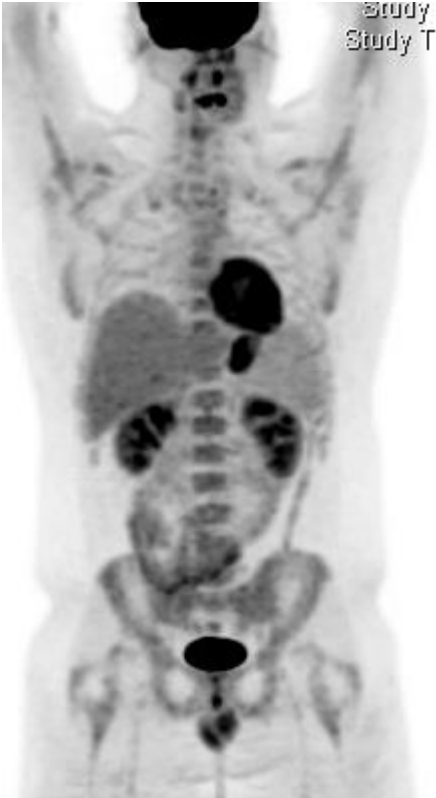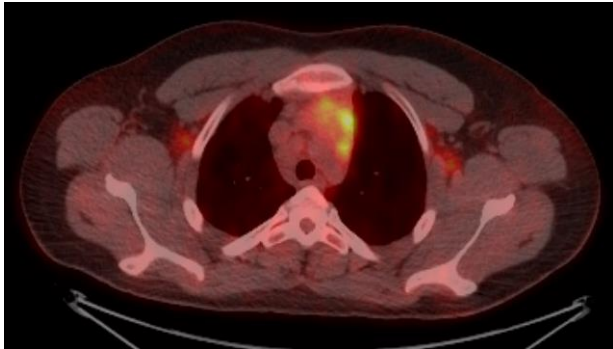

| MRN | Age | IPS | Escalated | Cycles | SUV Ratio  | Deauville | SUV | Liver | Response | RT | RT resp | Relapse | PFS | Death | OS | Rel prev site | Bx confirmed |
|-----|-----|-----|-----------|--------|------------|-----------|-----|-------|----------|----|---------|---------|-----|-------|----|---------------|--------------|
|     | 32  | 4-7 | BEACOPP   | 6      | $\geq 1.3$ | $\leq 3$  | 2.7 | 1.8   | CR       | 0  |         | 0       | 52  | 0     | 52 |               |              |

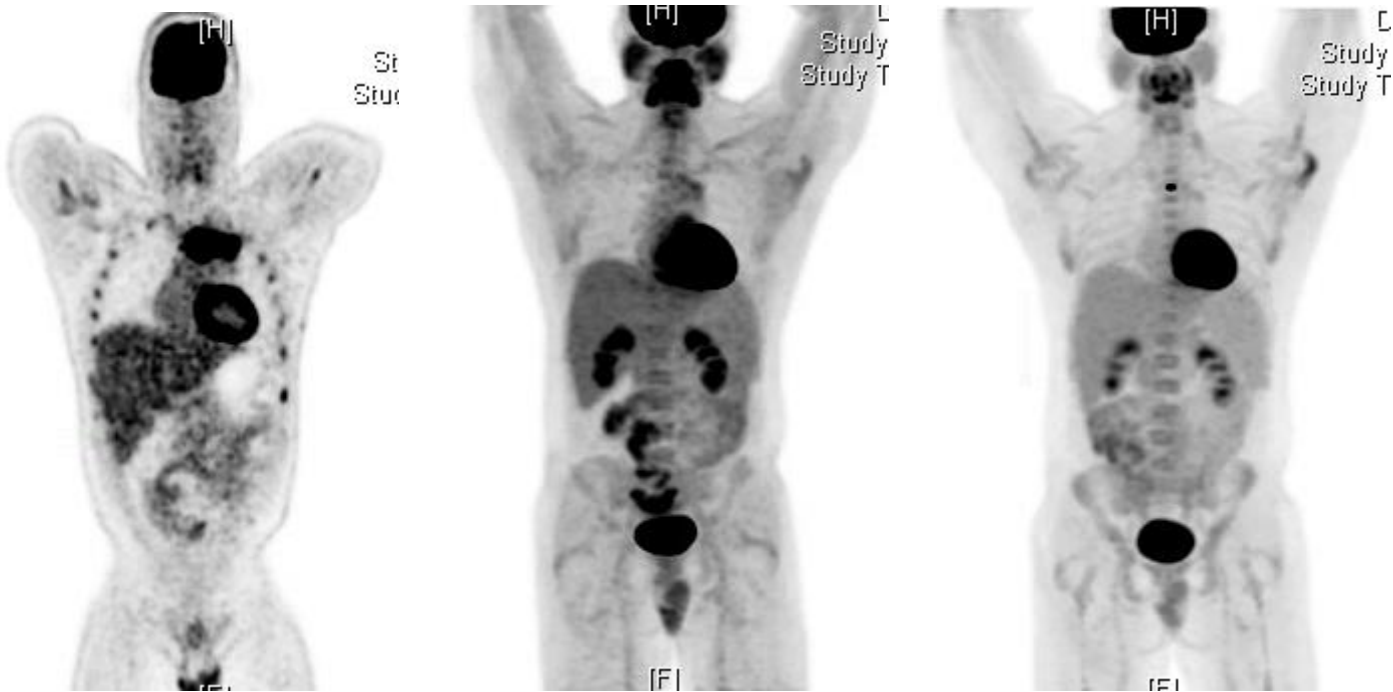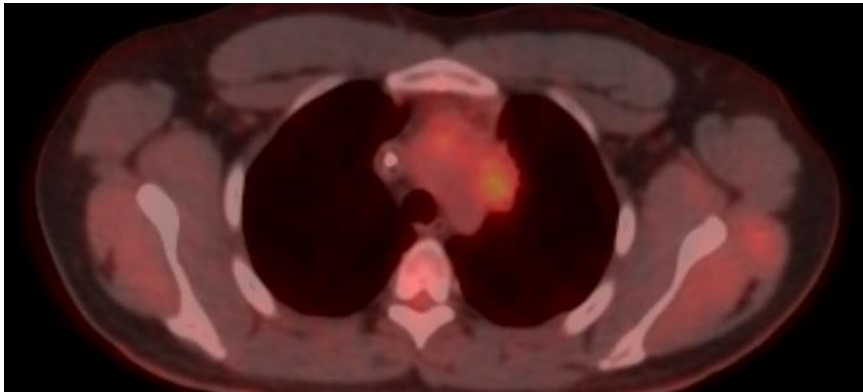



dvPET2+ (Deauville)

Patients with long-term Remission

| MRN | Age | IPS | Escalated | Cycles | SUV Ratio | Deauville | SUV  | Liver | Response | RT | RT resp | Relapse | PFS | Death | OS | Rel prev site | Bx confirmed |
|-----|-----|-----|-----------|--------|-----------|-----------|------|-------|----------|----|---------|---------|-----|-------|----|---------------|--------------|
|     | 39  | 0-1 | ABVD      | 6      | >=1.3     | >=4       | 10.8 | 3.1   | CR       | 0  |         | 0       | 42  | 0     | 42 |               | NED          |

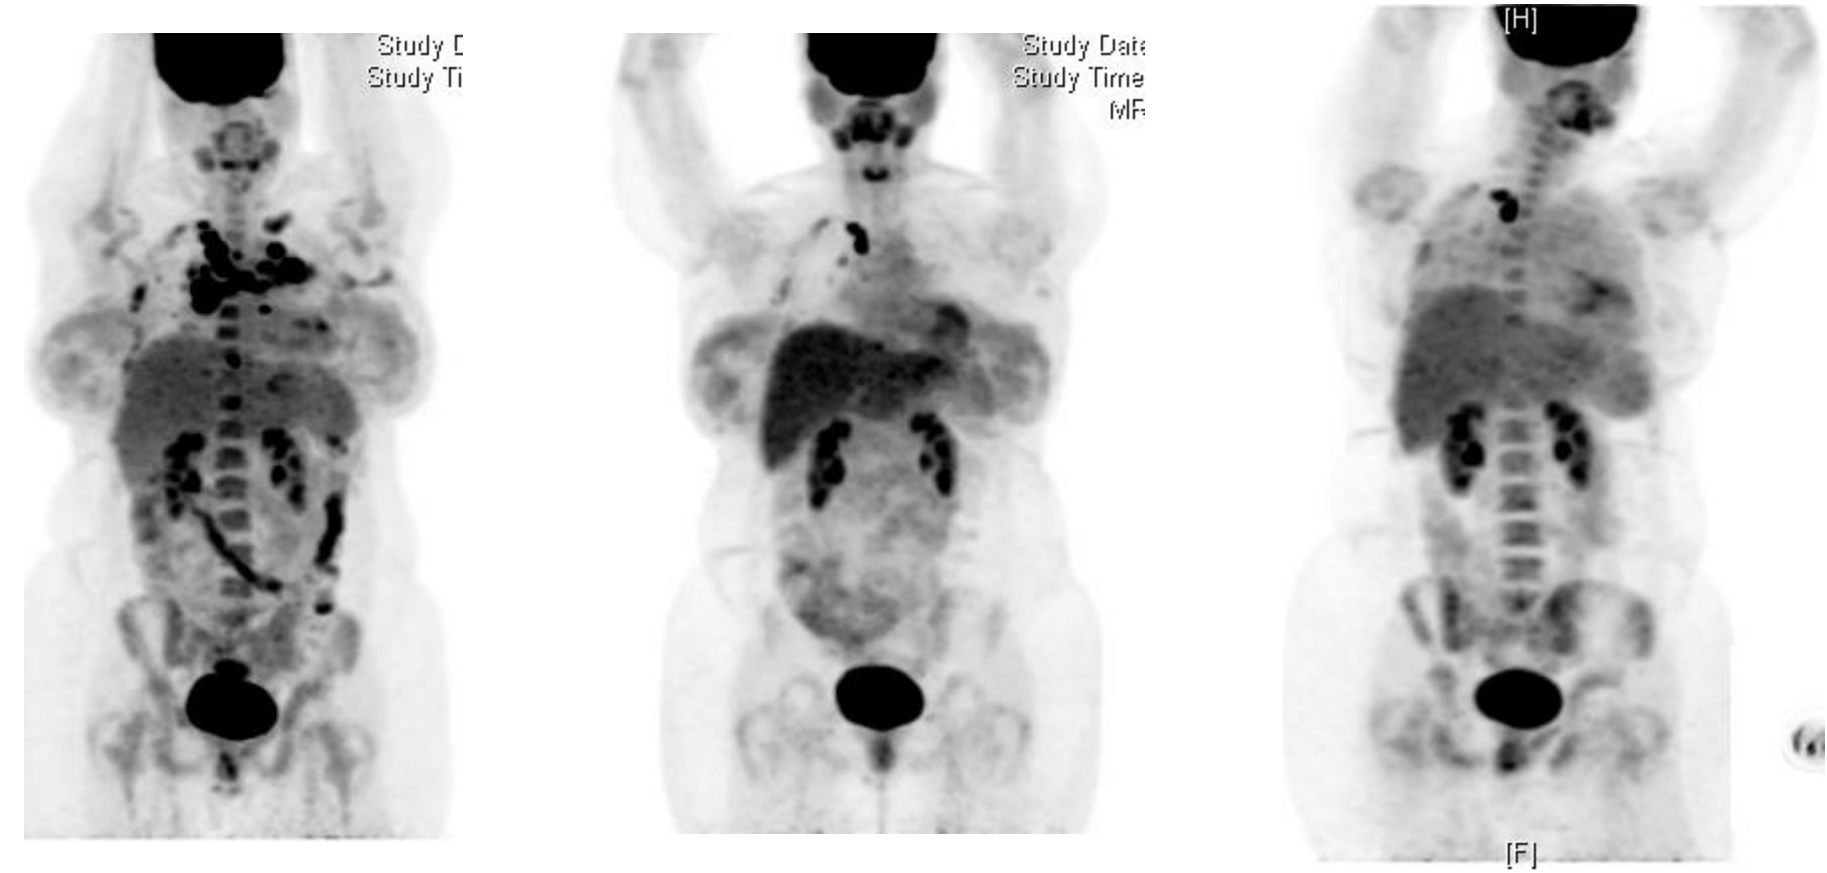

Biopsy w/o HL

| MRN | Age | IPS | Escalated | Cycles | SUV Ratio  | Deauville | SUV | Liver | Response | RT | RT resp | Relapse | PFS | Death | OS | Rel prev site | Bx confirmed |
|-----|-----|-----|-----------|--------|------------|-----------|-----|-------|----------|----|---------|---------|-----|-------|----|---------------|--------------|
|     | 47  | 2-3 | ABVD      | 6      | $\geq 1.3$ | $\geq 4$  | 7.4 | 1.4   | PR       | 1  |         | 0       | 84  | 0     | 84 |               | NED          |

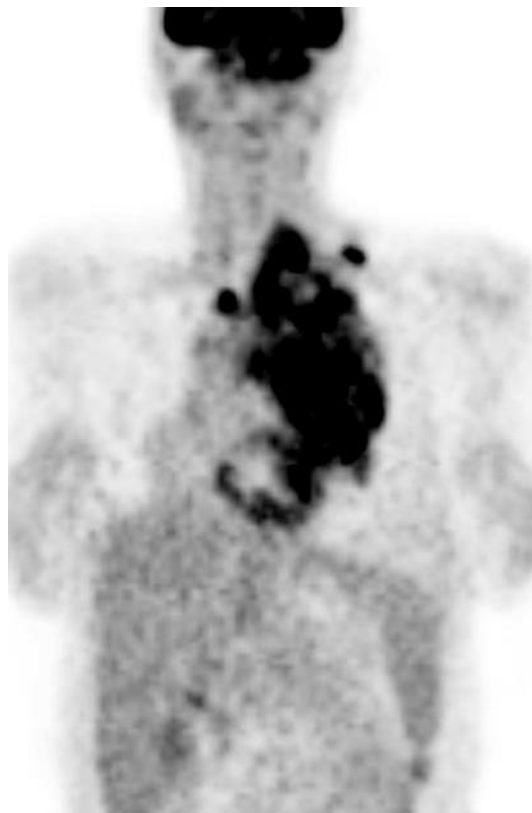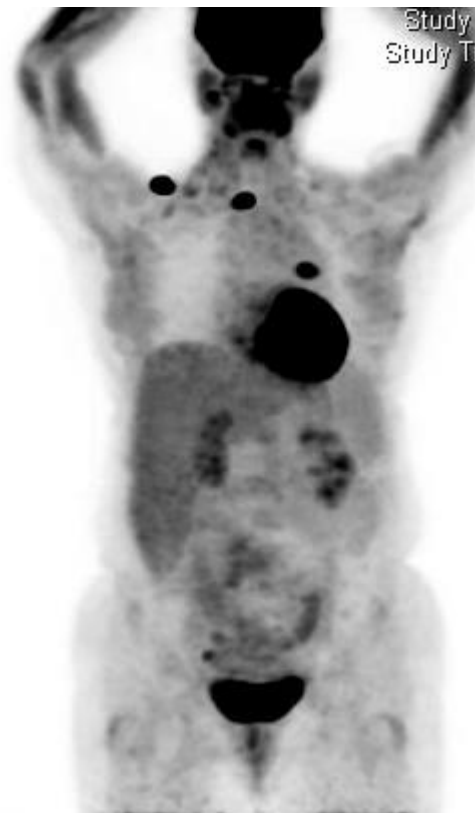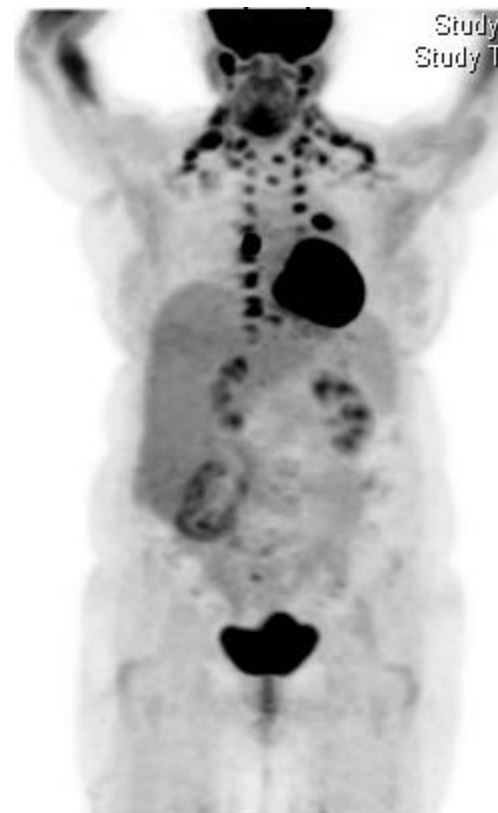

Persistent FDG avidity at EOT and after RT with biopsy x2  
without evidence of HL (histiocytic infiltrate)

| MRN | Age | IPS | Escalated | Cycles | SUV Ratio  | Deauville | SUV | Liver | Response | RT | RT resp | Relapse | PFS | Death | OS | Rel prev site | Bx confirmed |
|-----|-----|-----|-----------|--------|------------|-----------|-----|-------|----------|----|---------|---------|-----|-------|----|---------------|--------------|
|     | 19  | 0-1 | ABVD      | 6      | $\geq 1.3$ | $\geq 4$  | 5.5 | 1.7   | CR       | 1  |         | 0       | 60  | 0     | 60 |               |              |







Before RT



After RT

| MRN | Age | IPS | Escalated | Cycles | SUV Ratio | Deauville | SUV | Liver | Response | RT | RT resp | Relapse | PFS | Death | OS | Rel prev site | Bx confirmed |
|-----|-----|-----|-----------|--------|-----------|-----------|-----|-------|----------|----|---------|---------|-----|-------|----|---------------|--------------|
|     | 23  | 0-1 | ABVD      | 6      | >=1.3     | >=4       | 3.6 | 1.6   | CR       | 0  |         | 0       | 77  | 0     | 77 |               |              |

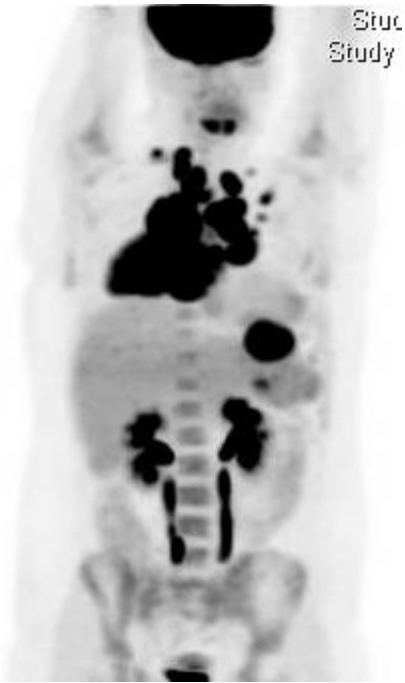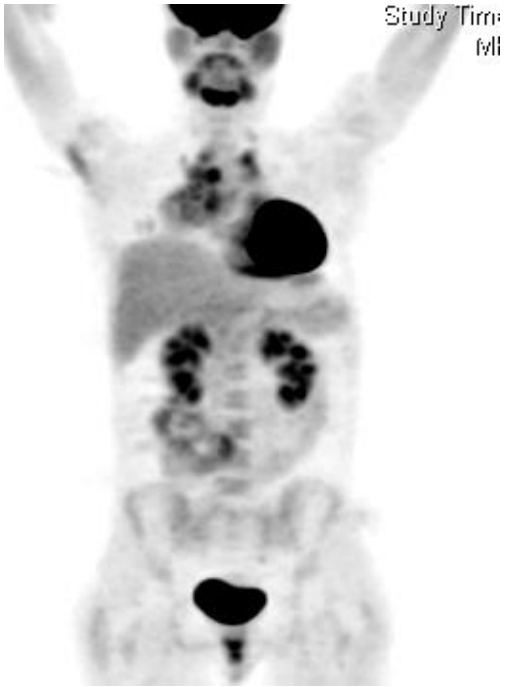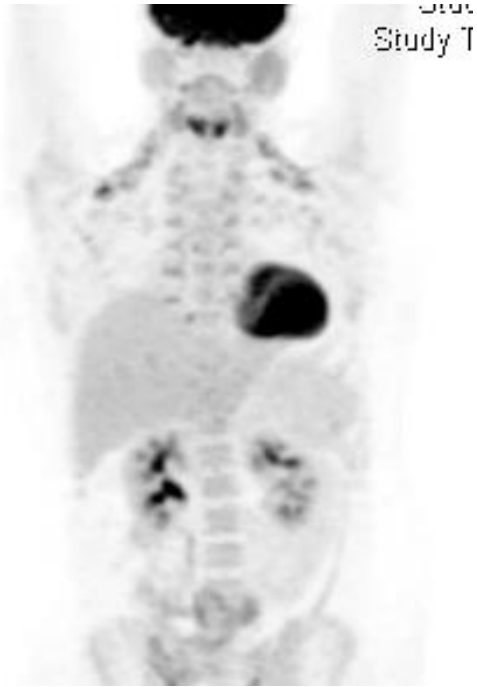

| MRN | Age | IPS | Escalated | Cycles | SUV Ratio  | Deauville | SUV | Liver | Response | RT | RT resp | Relapse | PFS | Death | OS | Rel prev site | Bx confirmed |
|-----|-----|-----|-----------|--------|------------|-----------|-----|-------|----------|----|---------|---------|-----|-------|----|---------------|--------------|
|     | 26  | 0-1 | ABVD      | 6      | $\geq 1.3$ | $\geq 4$  | 2.8 | 1.68  | CR       | 1  |         | 0       | 49  | 0     | 49 |               |              |

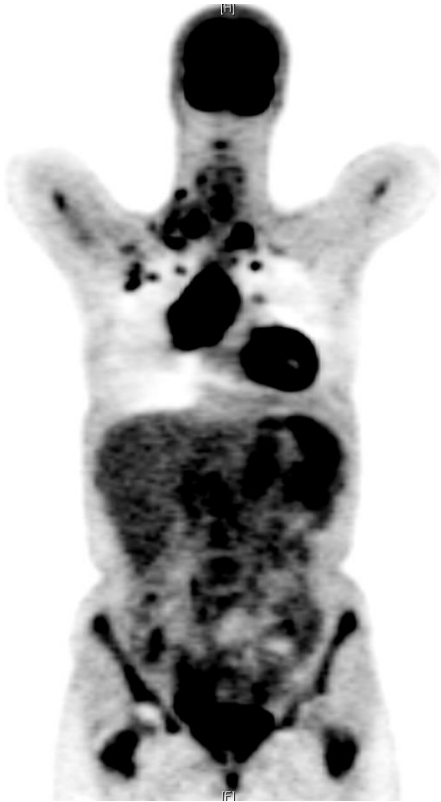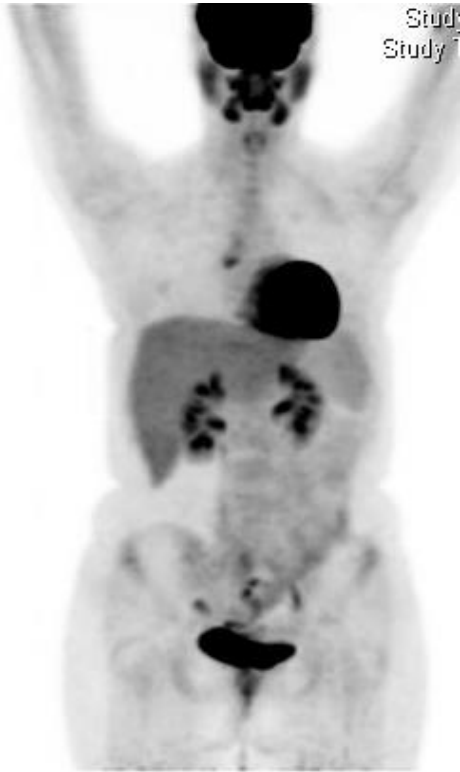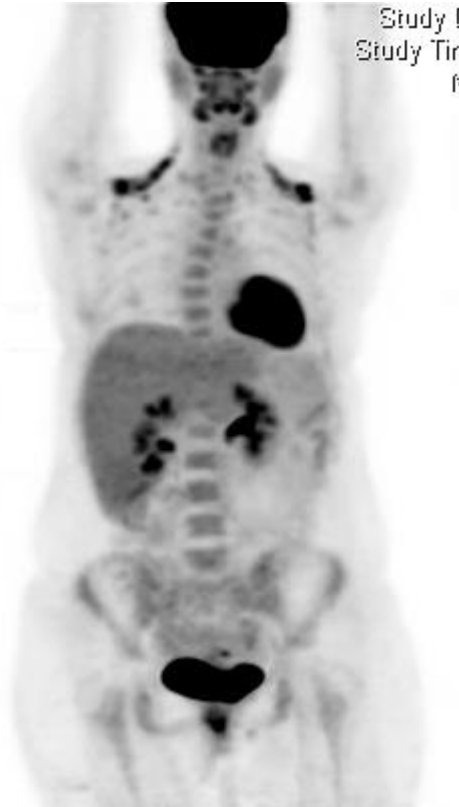

| MRN | Age | IPS | Escalated | Cycles | SUV Ratio  | Deauville | SUV | Liver | Response | RT | RT resp | Relapse | PFS | Death | OS | Rel prev site | Bx confirmed |
|-----|-----|-----|-----------|--------|------------|-----------|-----|-------|----------|----|---------|---------|-----|-------|----|---------------|--------------|
|     | 37  | 4-7 | ABVD      | 6      | $\geq 1.3$ | $\geq 4$  | 4.6 | 2     | CR       | 0  |         | 0       | 25  | 0     | 25 |               |              |

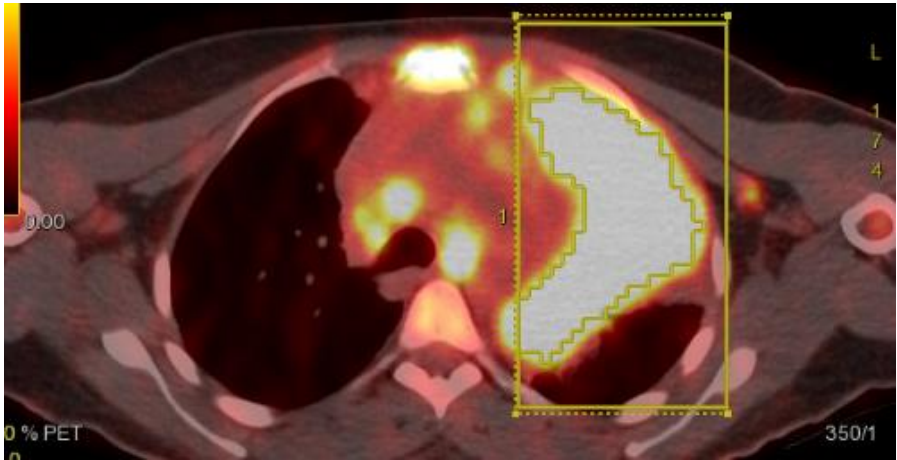

OSH

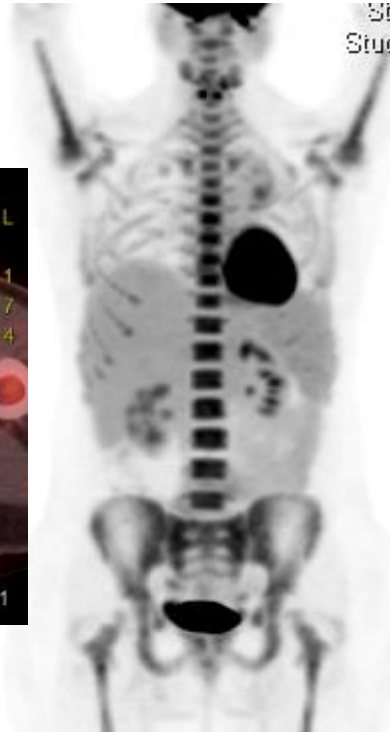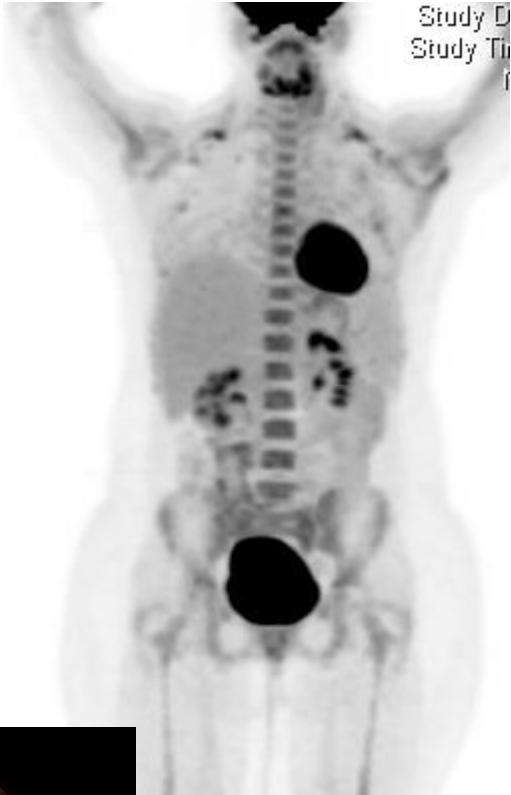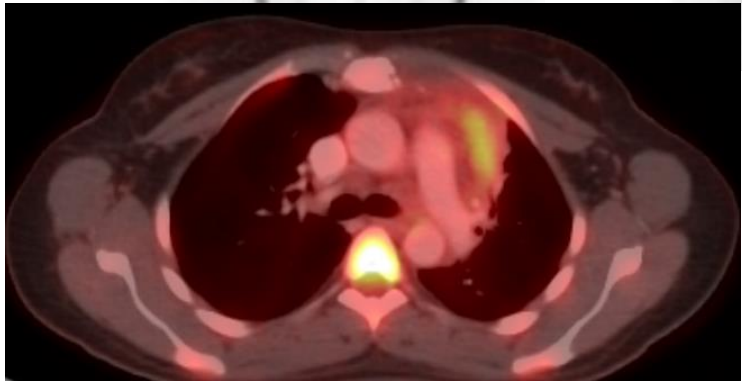



| MRN | Age | IPS | Escalated | Cycles | SUV Ratio | Deauville | SUV | Liver | Response | RT | RT resp | Relapse | PFS | Death | OS | Rel prev site | Bx confirmed |
|-----|-----|-----|-----------|--------|-----------|-----------|-----|-------|----------|----|---------|---------|-----|-------|----|---------------|--------------|
|     | 76  | 4-7 | ABVD      | 6      | >=1.3     | >=4       | 5.2 | 3     | CR       | 0  |         | 0       | 23  | 0     | 23 |               |              |

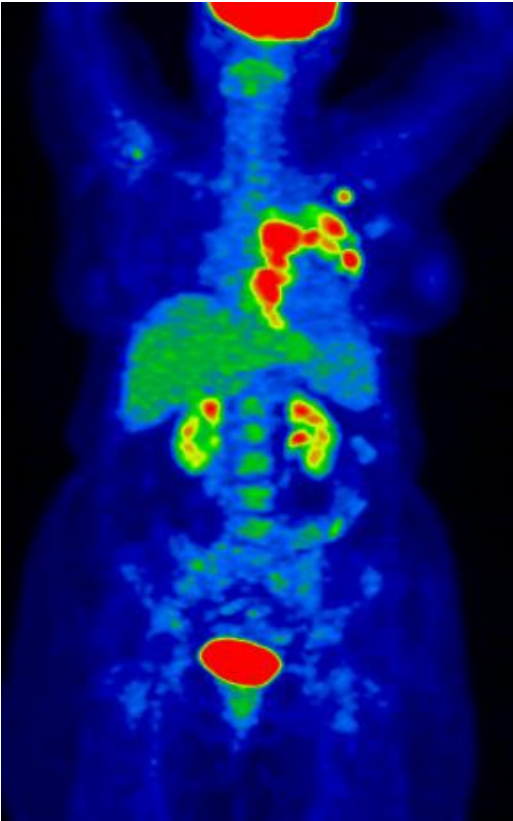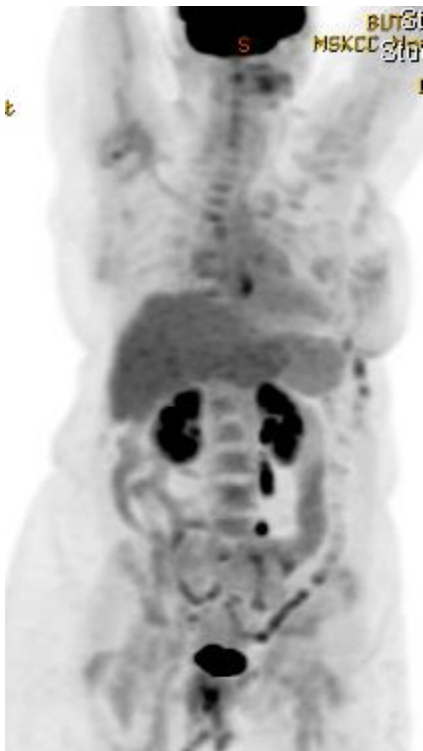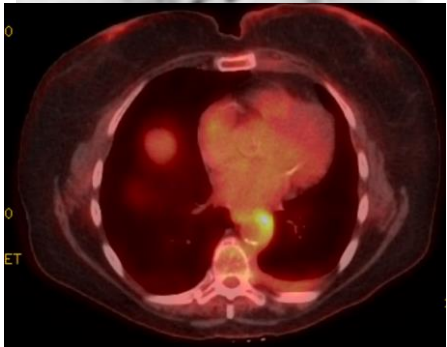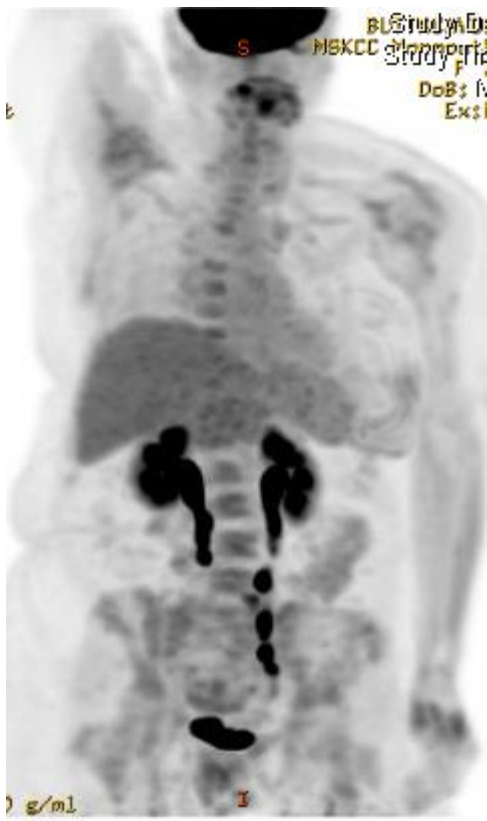



| MRN | Age | IPS | Escalated | Cycles | SUV Ratio  | Deauville | SUV | Liver | Response | RT | RT resp | Relapse | PFS | Death | OS | Rel prev site | Bx confirmed |
|-----|-----|-----|-----------|--------|------------|-----------|-----|-------|----------|----|---------|---------|-----|-------|----|---------------|--------------|
|     | 61  | 2-3 | ABVD      | 6      | $\geq 1.3$ | $\geq 4$  | 4.4 | 1.9   | PR       | 0  |         | 0       | 17  | 0     | 17 |               |              |

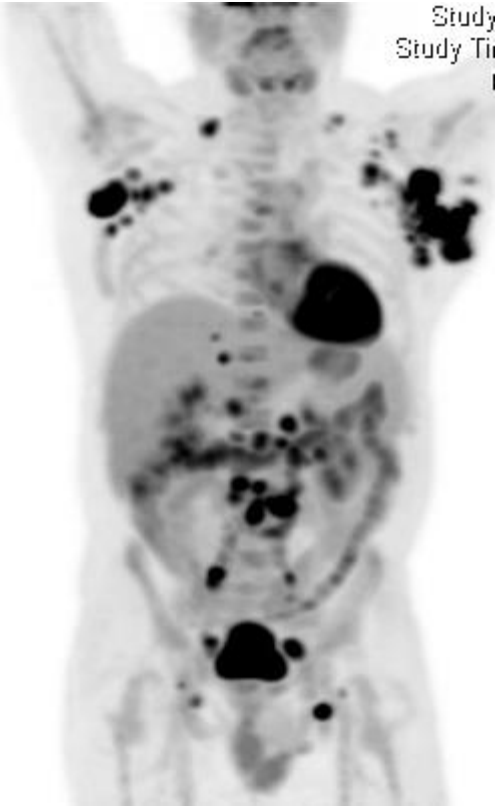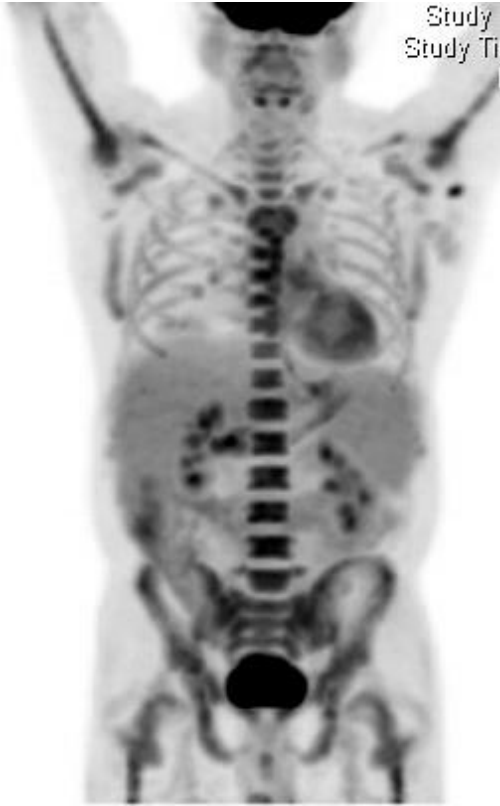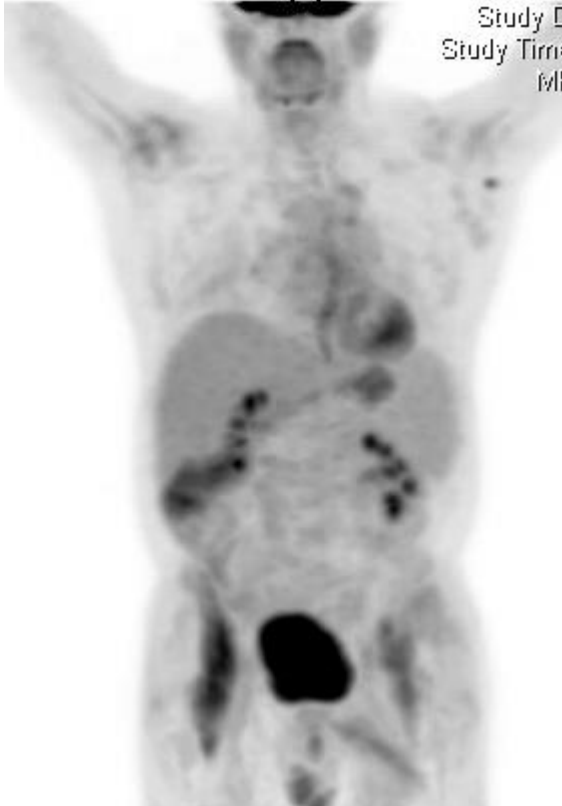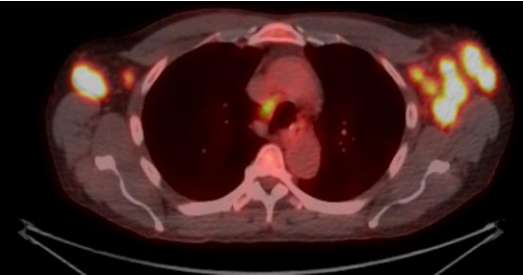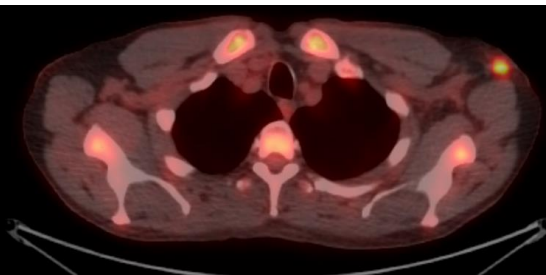

| MRN | Age | IPS | Escalated | Cycles | SUV Ratio | Deauville | SUV | Liver | Response | RT | RT resp | Relapse | PFS | Death | OS | Rel prev site | Bx confirmed |
|-----|-----|-----|-----------|--------|-----------|-----------|-----|-------|----------|----|---------|---------|-----|-------|----|---------------|--------------|
|     | 34  | 0-1 | ABVD      | 6      | >=1.3     | >=4       | 8.1 | 2.6   | CR       | 0  |         | 0       | 29  | 0     | 29 |               |              |

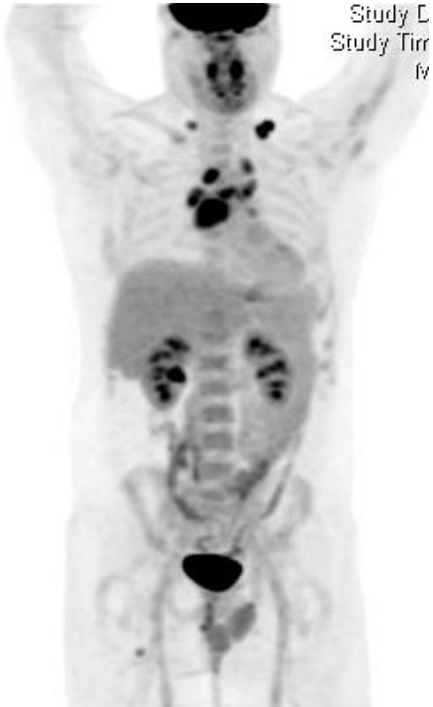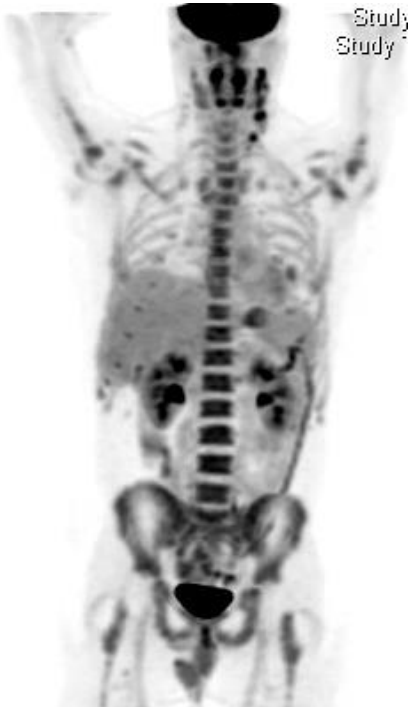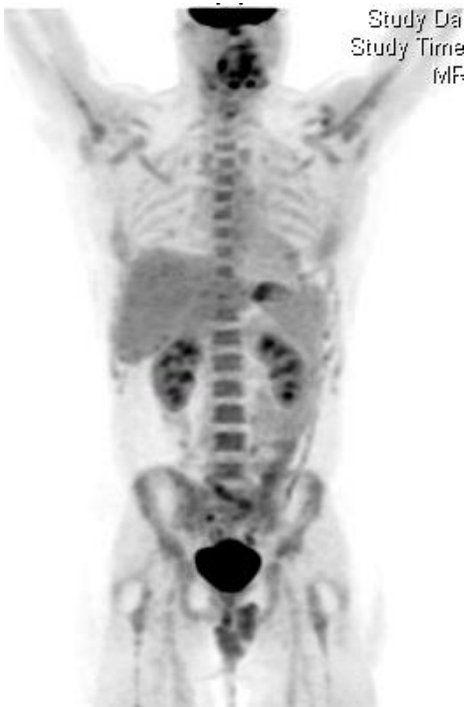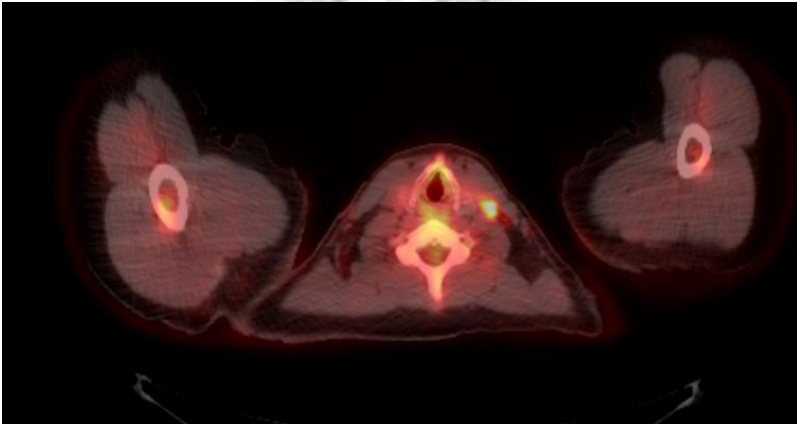

| MRN | Age | IPS | Escalated | Cycles | SUV Ratio | Deauville | SUV | Liver | Response | RT | RT resp | Relapse | PFS | Death | OS | Rel prev site | Bx confirmed |
|-----|-----|-----|-----------|--------|-----------|-----------|-----|-------|----------|----|---------|---------|-----|-------|----|---------------|--------------|
|     | 35  | 2-3 | ABVD      | 6      | >=1.3     | >=4       | 9   | 2.3   | PR       | 0  |         | 0       | 57  | 0     | 57 |               |              |

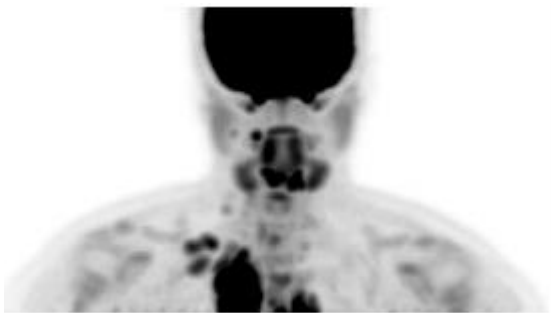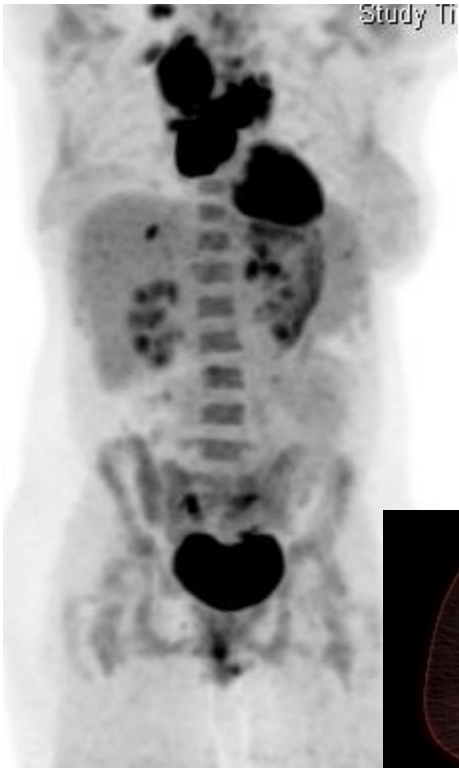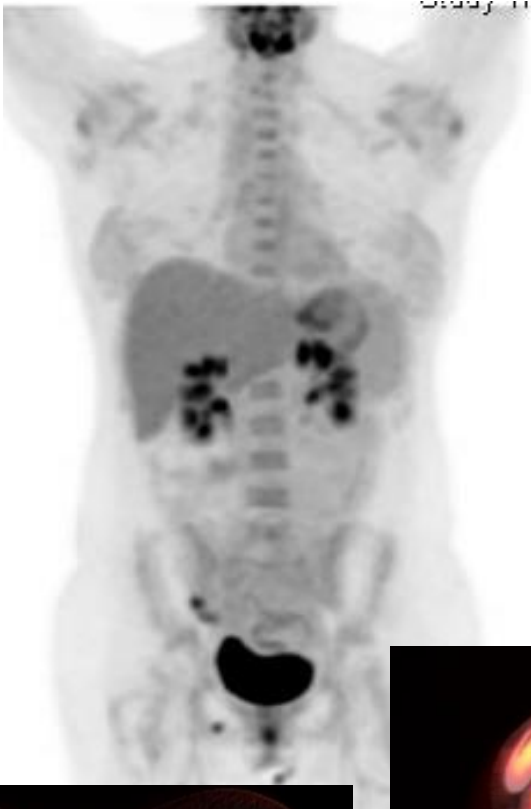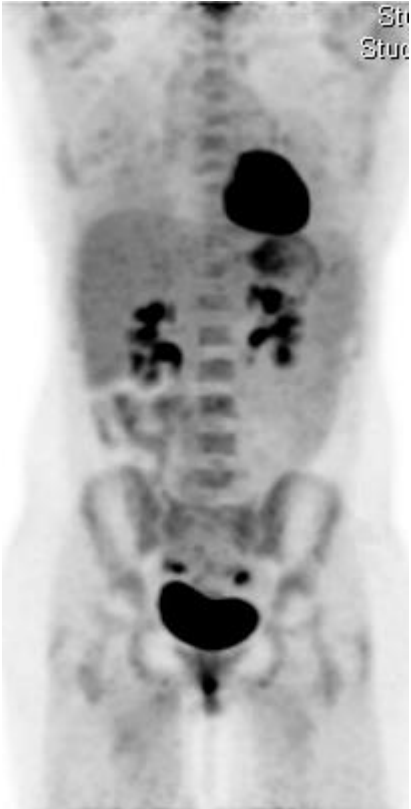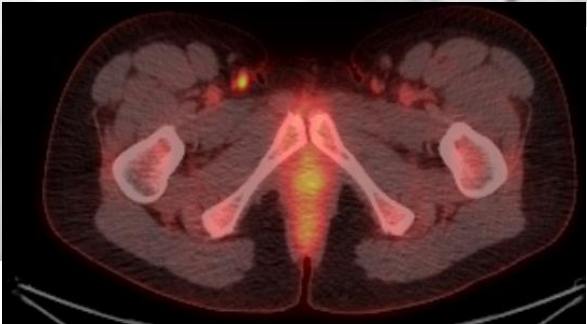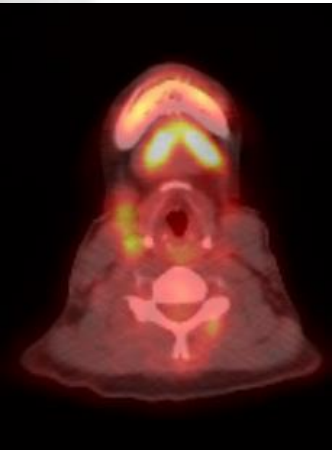

| MRN | Age | IPS | Escalated | Cycles | SUV Ratio  | Deauville | SUV | Liver | Response | RT | RT resp | Relapse | PFS | Death | OS | Rel prev site | Bx confirmed |
|-----|-----|-----|-----------|--------|------------|-----------|-----|-------|----------|----|---------|---------|-----|-------|----|---------------|--------------|
|     | 25  | 2-3 | ABVD      | 6      | $\geq 1.3$ | $\geq 4$  | 2.9 | 1.8   | CR       | 0  |         | 0       | 42  | 0     | 42 |               |              |

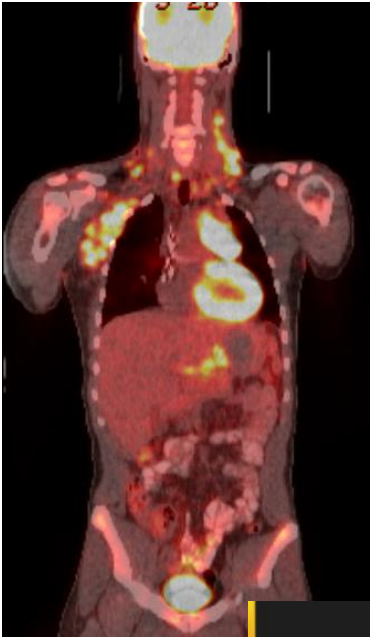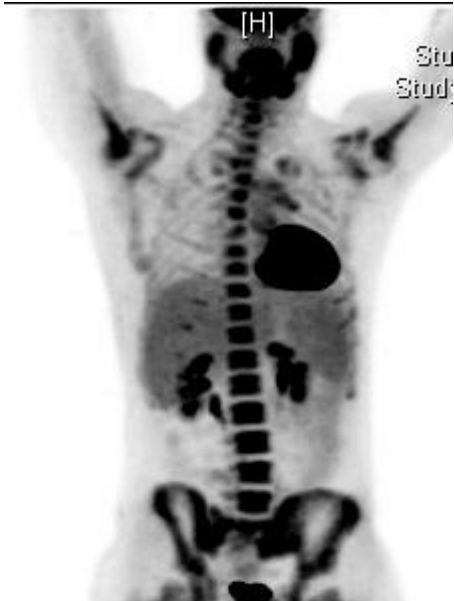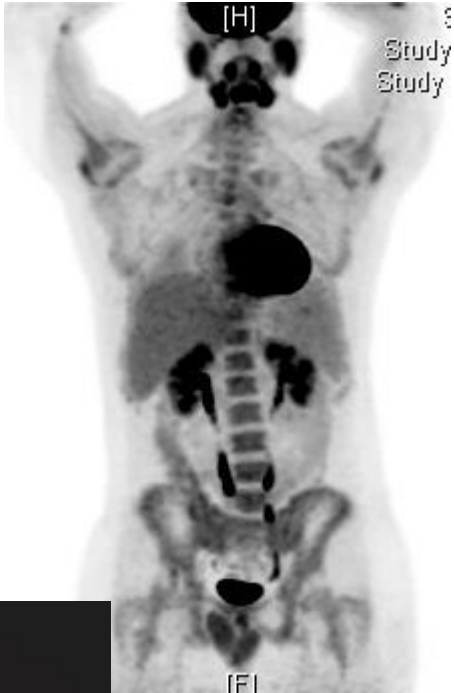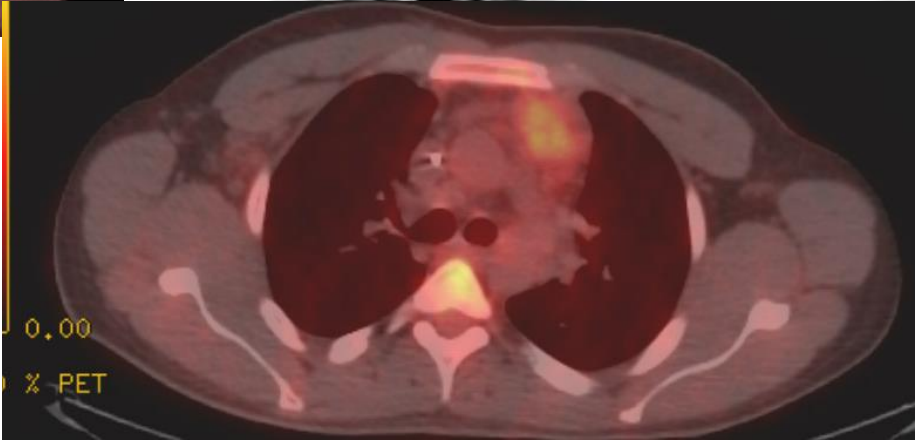

| MRN | Age | IPS | Escalated | Cycles | SUV Ratio | Deauville | SUV | Liver | Response | RT | RT resp | Relapse | PFS | Death | OS | Rel prev site | Bx confirmed |
|-----|-----|-----|-----------|--------|-----------|-----------|-----|-------|----------|----|---------|---------|-----|-------|----|---------------|--------------|
|     | 46  | 2-3 | ABVD      | 6      | >=1.3     | >=4       | 4.2 | 1.9   | PR       | 0  |         | 0       | 64  | 0     | 64 |               |              |

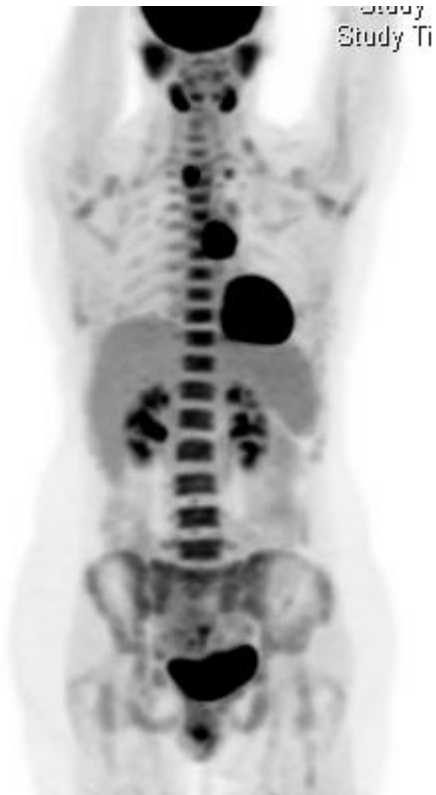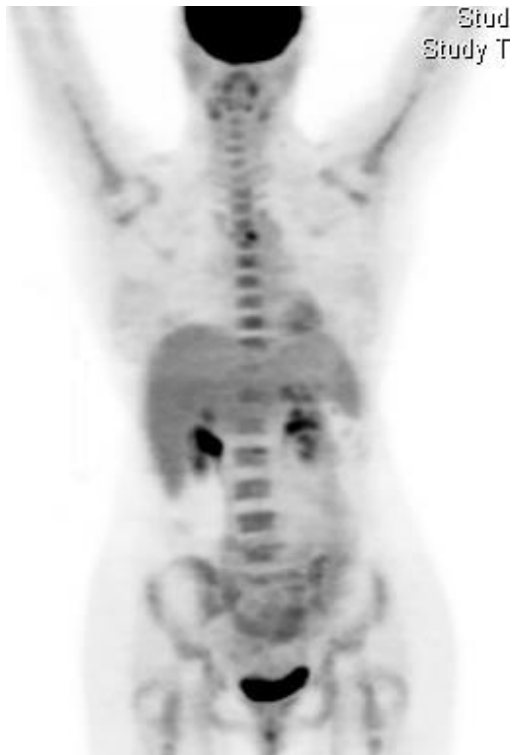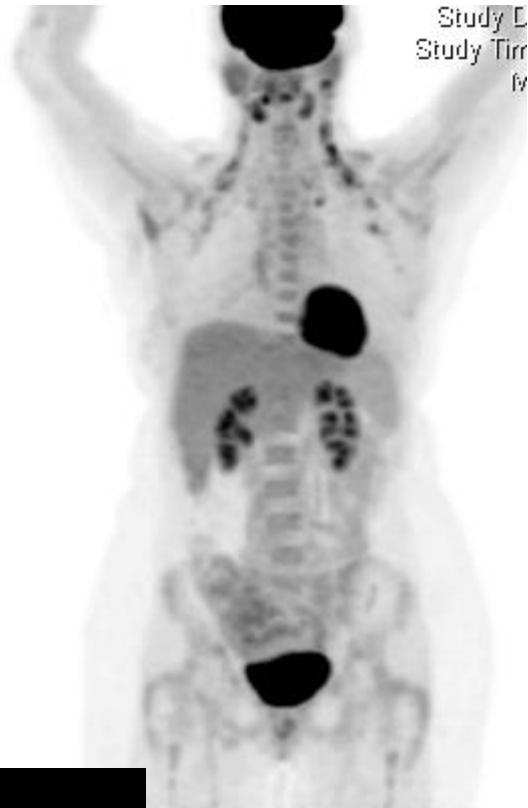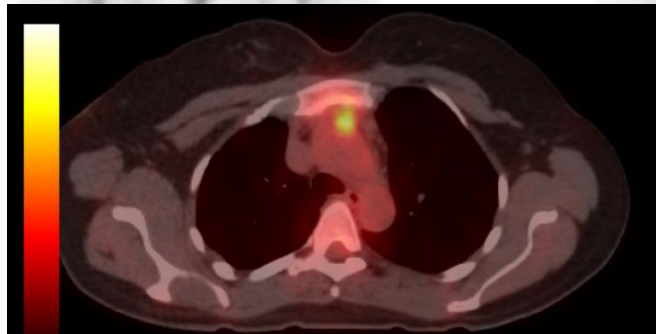

| MRN | Age | IPS | Escalated | Cycles | SUV Ratio | Deauville | SUV | Liver | Response | RT | RT resp | Relapse | PFS | Death | OS | Rel prev site | Bx confirmed |
|-----|-----|-----|-----------|--------|-----------|-----------|-----|-------|----------|----|---------|---------|-----|-------|----|---------------|--------------|
|     | 24  | 2-3 | ABVD      | 6      | >=1.3     | >=4       | 8.7 | 1.6   | CR       | 0  |         | 0       | 25  | 0     | 25 |               |              |

OSH

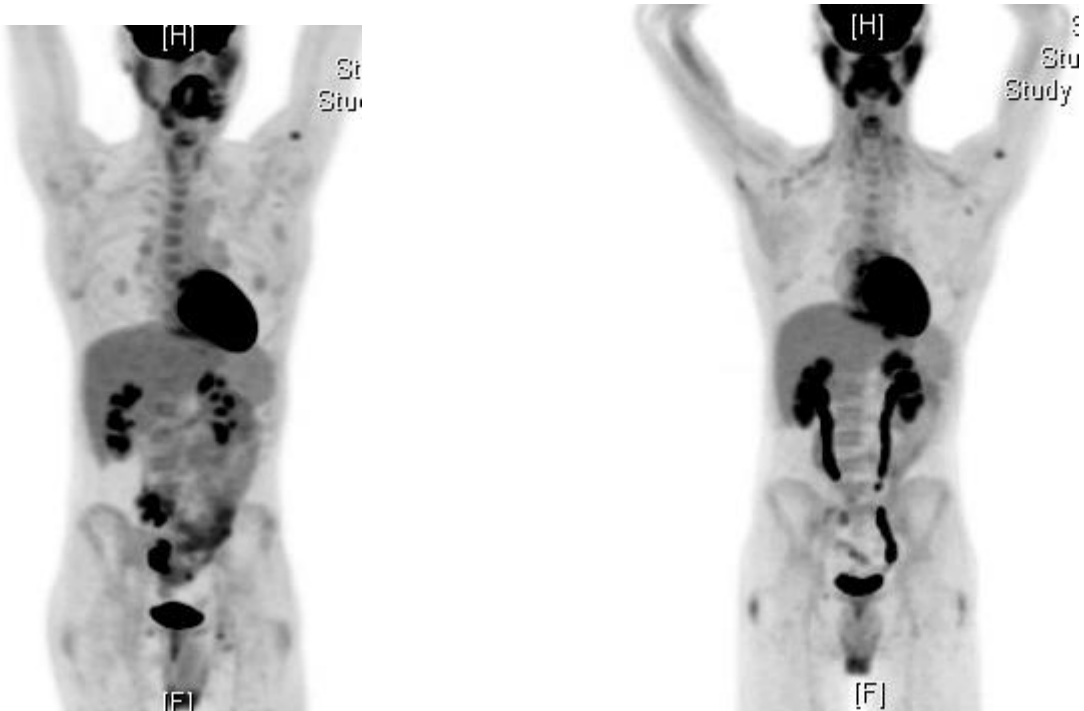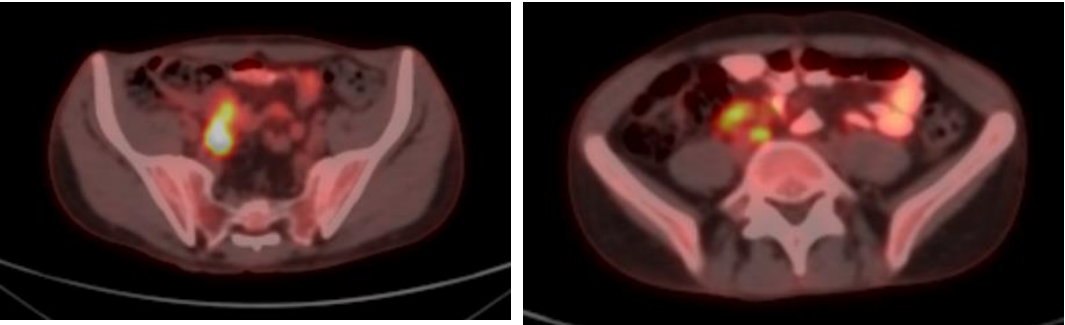



| MRN | Age | IPS | Escalated | Cycles | SUV Ratio  | Deauville | SUV | Liver | Response | RT | RT resp | Relapse | PFS | Death | OS | Rel prev site | Bx confirmed |
|-----|-----|-----|-----------|--------|------------|-----------|-----|-------|----------|----|---------|---------|-----|-------|----|---------------|--------------|
|     | 57  | 4-7 | ABVD      | 6      | $\geq 1.3$ | $\geq 4$  | 3.7 | 2.3   | CR       | 0  |         | 0       | 54  | 0     | 54 |               |              |

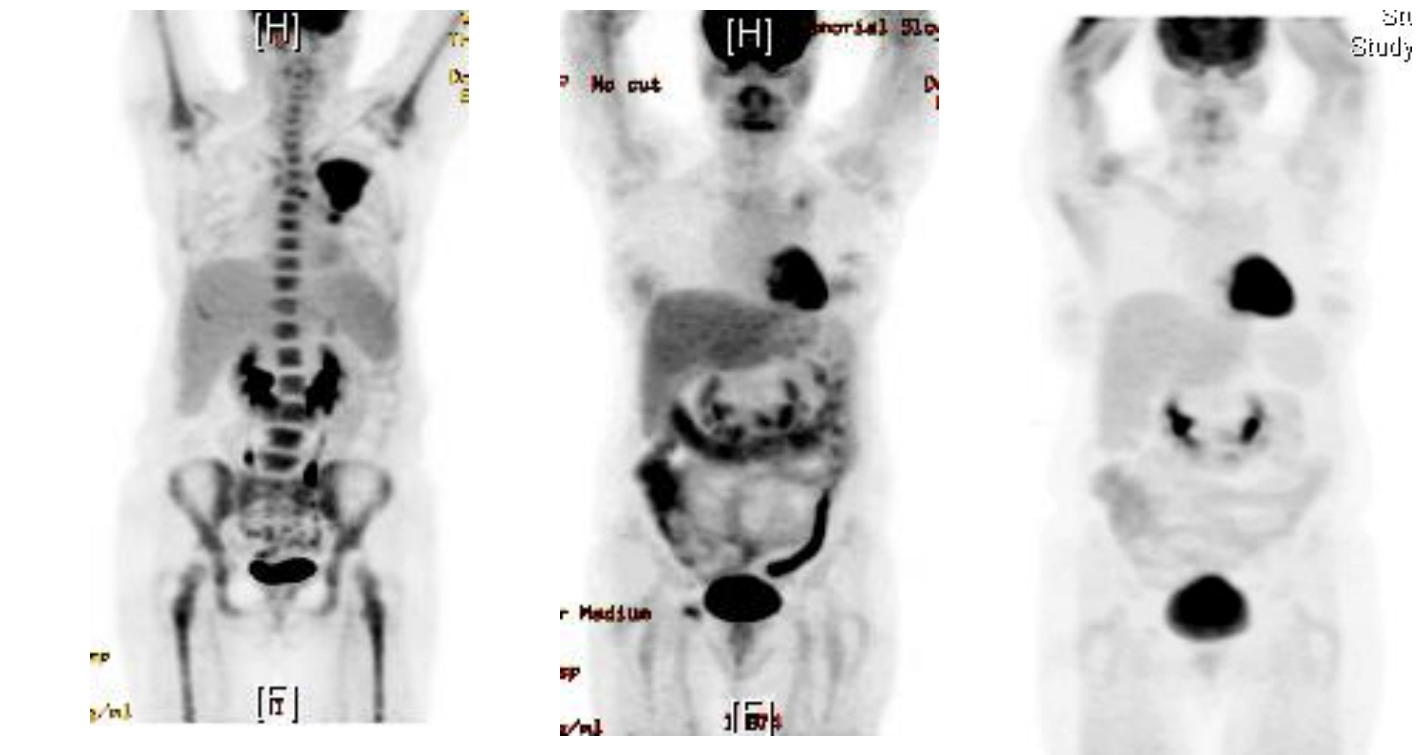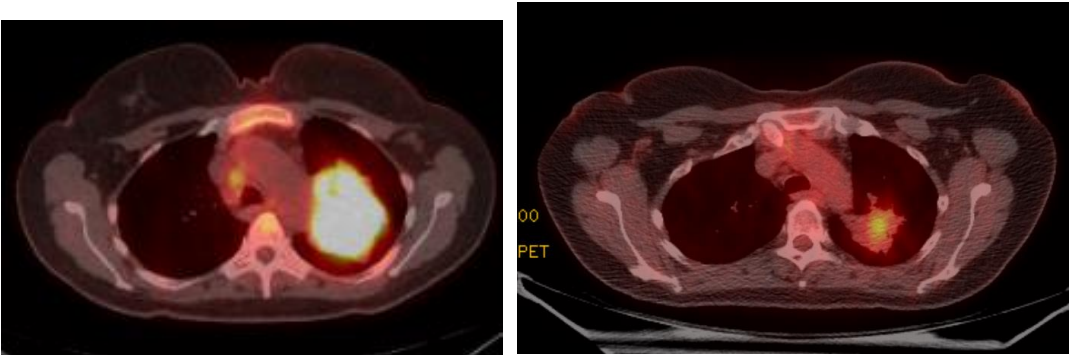

| MRN | Age | IPS | Escalated | Cycles | SUV Ratio | Deauville | SUV | Liver | Response | RT | RT resp | Relapse | PFS | Death | OS | Rel prev site | Bx confirmed |
|-----|-----|-----|-----------|--------|-----------|-----------|-----|-------|----------|----|---------|---------|-----|-------|----|---------------|--------------|
|     | 39  | 0-1 | ABVD      | 6      | >=1.3     | >=4       | 4.2 | 2.9   | CR       | 0  |         | 0       | 61  | 0     | 61 |               |              |

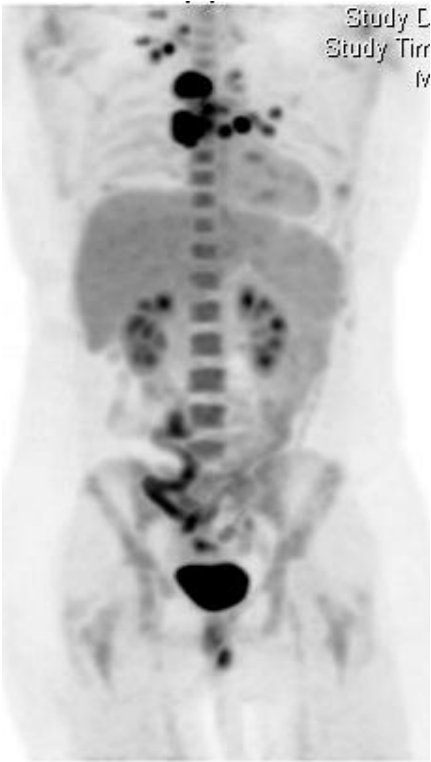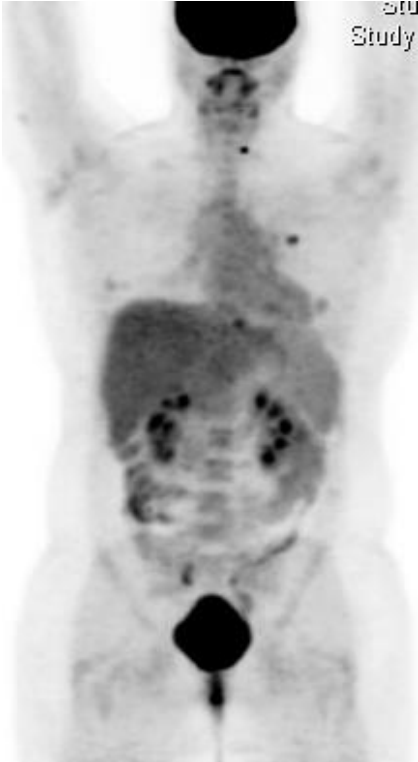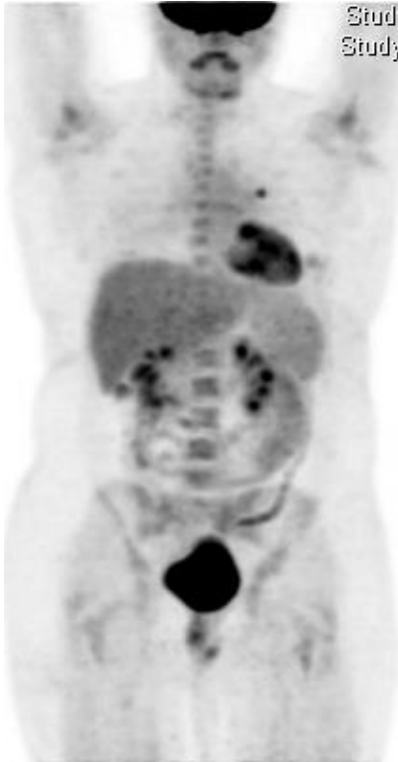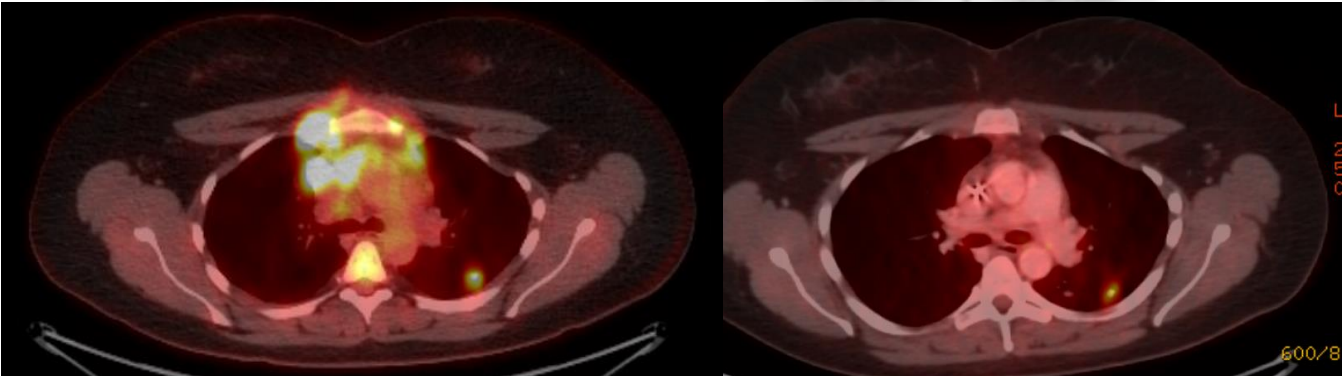



| MRN | Age | IPS | Escalated | Cycles | SUV Ratio  | Deauville | SUV | Liver | Response | RT | RT resp | Relapse | PFS | Death | OS | Rel prev site | Bx confirmed |
|-----|-----|-----|-----------|--------|------------|-----------|-----|-------|----------|----|---------|---------|-----|-------|----|---------------|--------------|
|     | 34  | 0-1 | ABVD      | 6      | $\geq 1.3$ | $\geq 4$  | 4.2 | 3.32  | CR       | 0  |         | 0       | 30  | 0     | 30 |               |              |

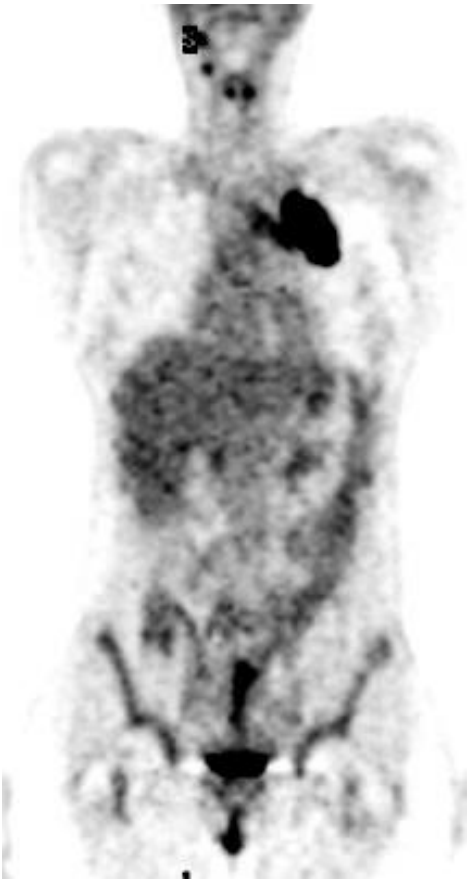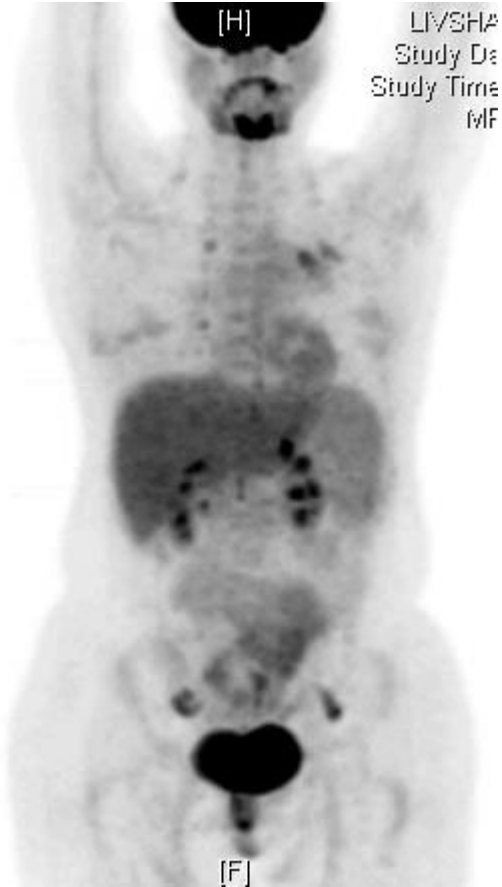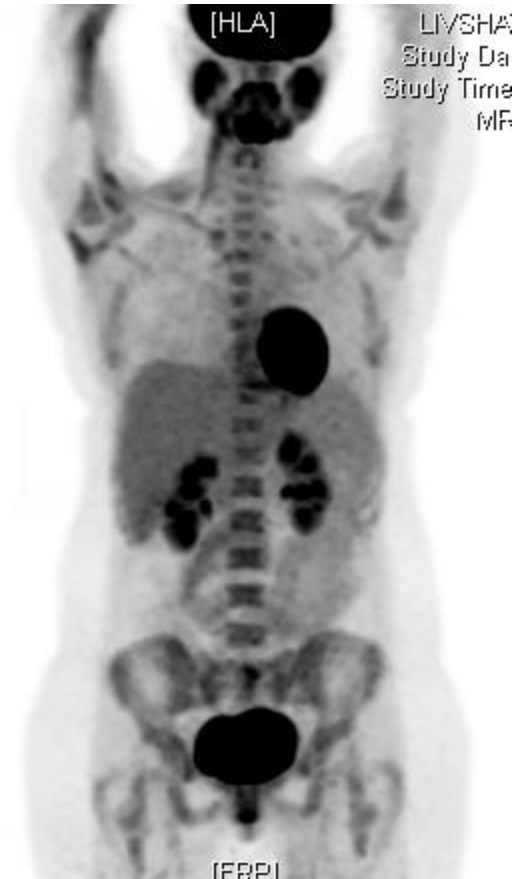

| MRN | Age | IPS | Escalated | Cycles | SUV Ratio  | Deauville | SUV | Liver | Response | RT | RT resp | Relapse | PFS | Death | OS | Rel prev site | Bx confirmed |
|-----|-----|-----|-----------|--------|------------|-----------|-----|-------|----------|----|---------|---------|-----|-------|----|---------------|--------------|
|     | 22  | 2-3 | ABVD      | 6      | $\geq 1.3$ | $\geq 4$  | 3.6 | 2     | CR       | 0  |         | 0       | 27  | 0     | 27 |               |              |

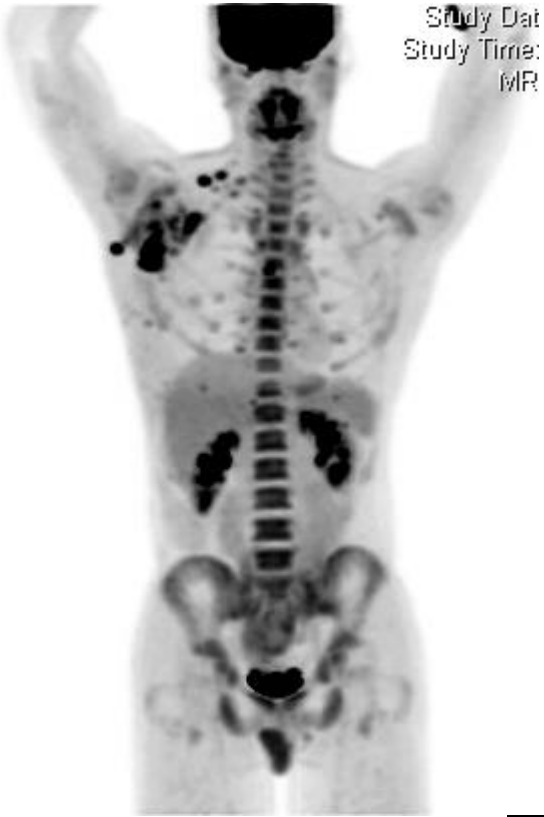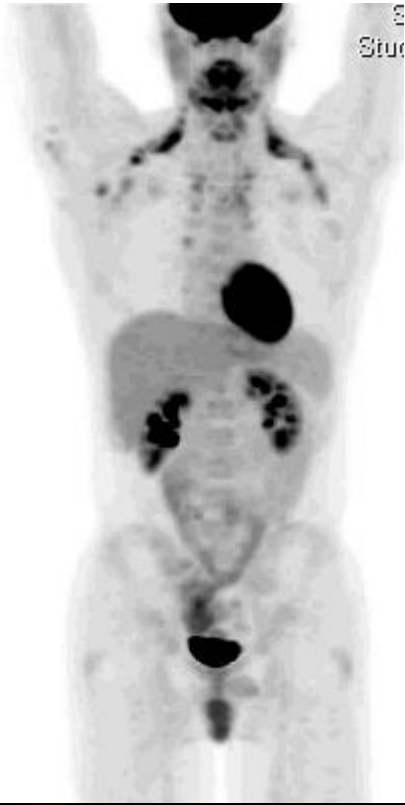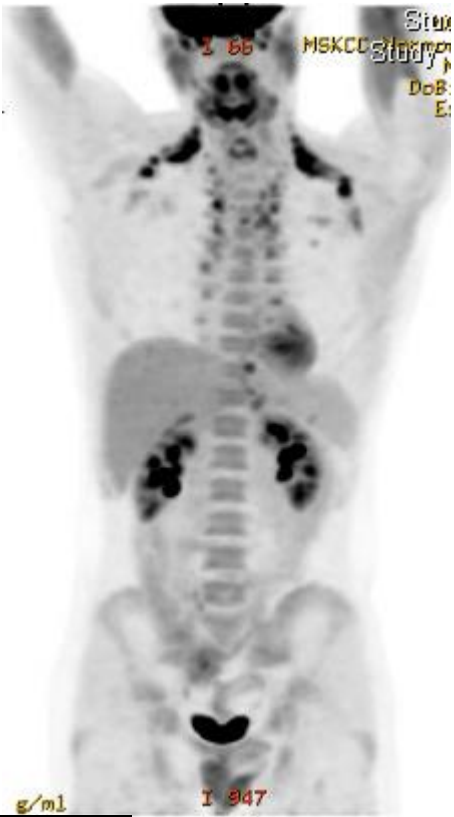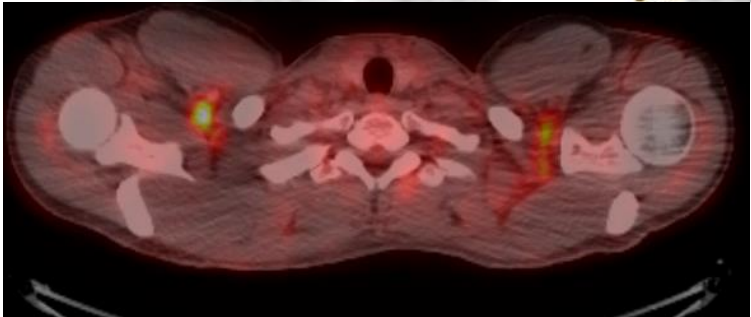

dvPET2+ (Deauville)  
Patients with POD

| MRN | Age | IPS | Escalated | Cycles | SUV Ratio | Deauville | SUV | Liver | Response | RT | RT resp | Relapse | PFS | Death | OS | Rel prev site | Bx confirmed |
|-----|-----|-----|-----------|--------|-----------|-----------|-----|-------|----------|----|---------|---------|-----|-------|----|---------------|--------------|
|     | 37  | 2-3 | ABVD      | 4      | >=1.3     | >=4       | 7.2 | 3.4   | PR       | 0  |         | 1       | 4   | 0     | 39 | 1             | 1            |

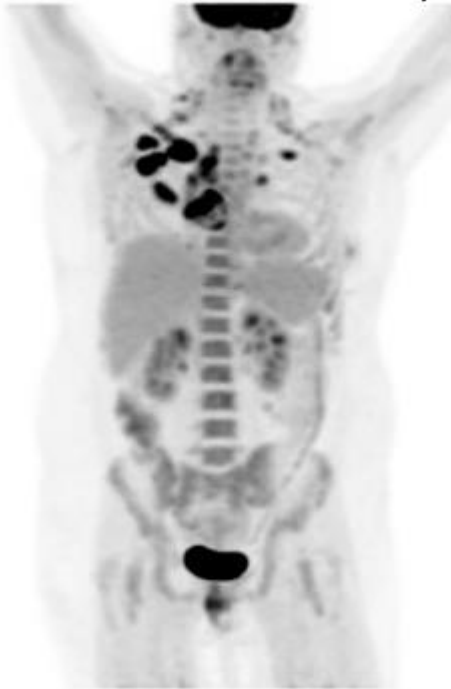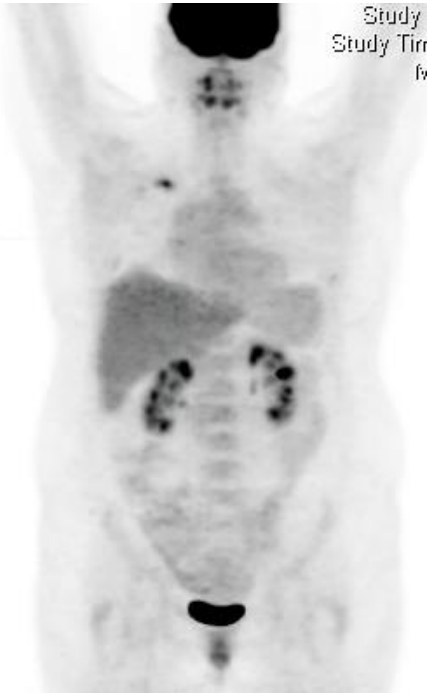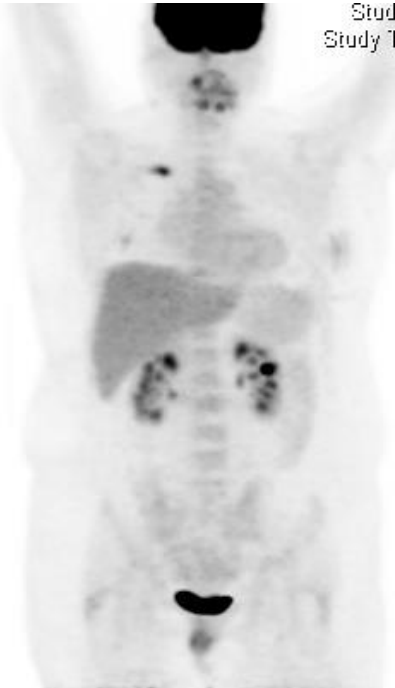

|                     |
|---------------------|
| Tx 2                |
| BV+nivolumab - ASCT |

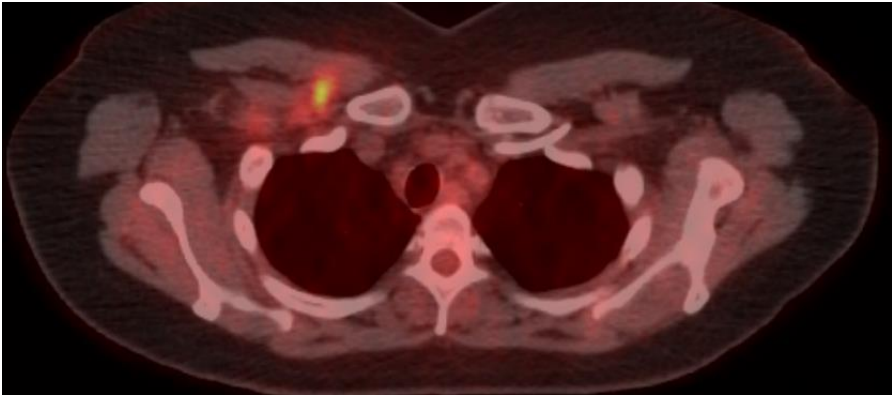

| MRN | Age | IPS | Escalated | Cycles | SUV Ratio  | Deauville | SUV | Liver | Response | RT | RT resp | Relapse | PFS | Death | OS | Rel prev site | Bx confirmed |
|-----|-----|-----|-----------|--------|------------|-----------|-----|-------|----------|----|---------|---------|-----|-------|----|---------------|--------------|
|     | 36  | 0-1 | ABVD      | 6      | $\geq 1.3$ | $\geq 4$  | 4.3 | 1.6   | POD      | 0  |         | 1       | 6   | 1     | 79 | 1             | 1            |

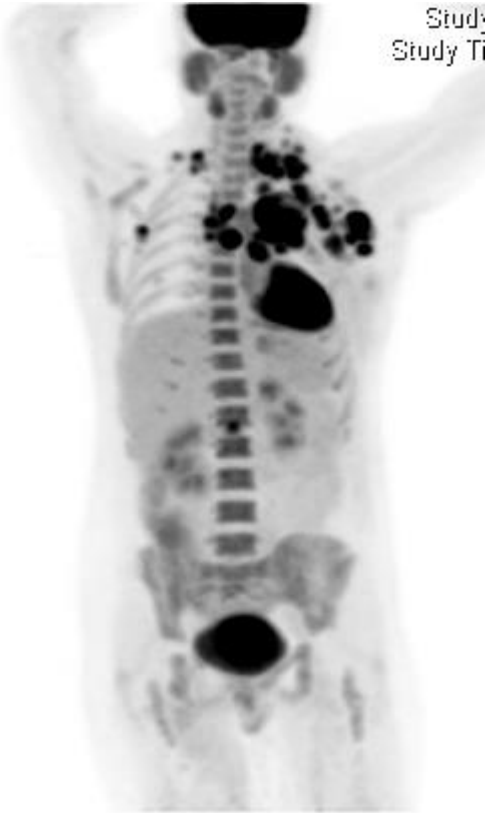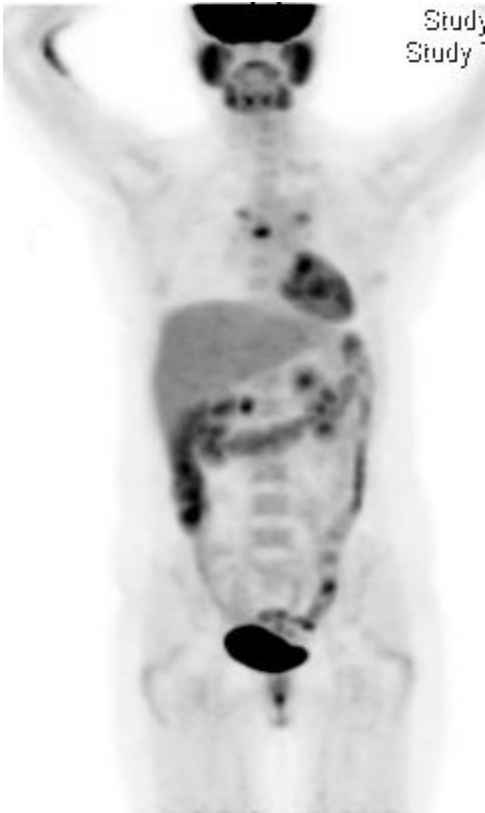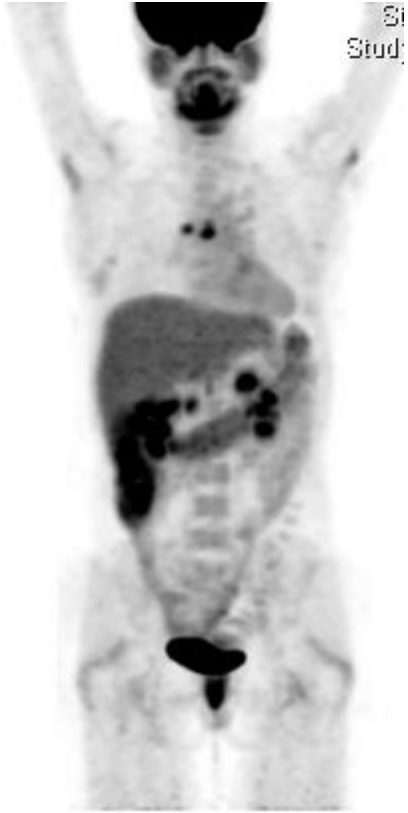

|             |
|-------------|
| Tx-2        |
| BV-ICE-ASCT |

| MRN | Age | IPS | Escalated | Cycles | SUV Ratio | Deauville | SUV | Liver | Response | RT | RT resp | Relapse | PFS | Death | OS | Rel prev site | Bx confirmed |
|-----|-----|-----|-----------|--------|-----------|-----------|-----|-------|----------|----|---------|---------|-----|-------|----|---------------|--------------|
|     | 57  | 0-1 | ABVD      | 6      | >=1.3     | DV-4      | 3.7 | 2.29  | POD      | 0  |         | 1       | 6   | 0     | 28 | 1             | 1            |

OSH

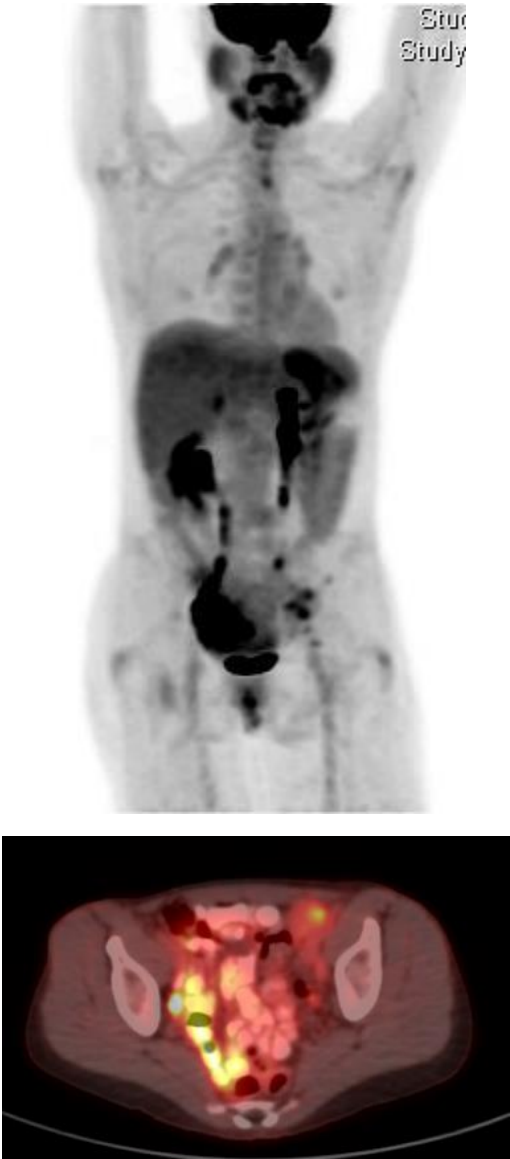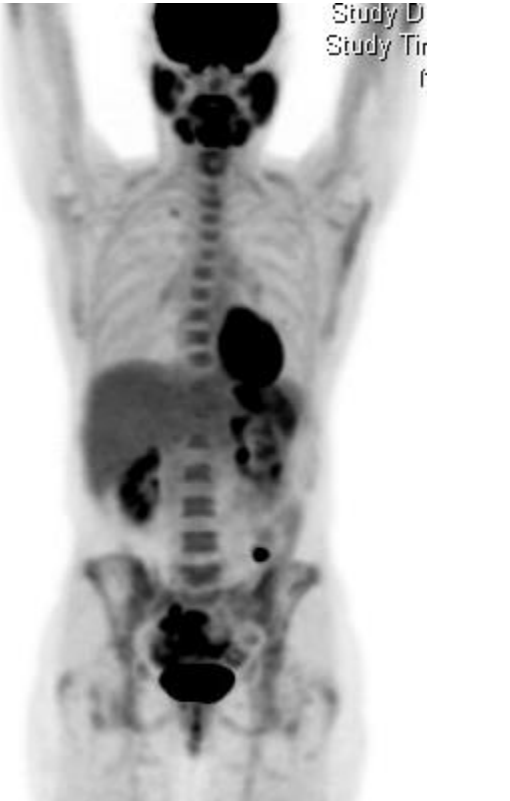

|         |
|---------|
| Tx-2    |
| BV-ASCT |

| MRN | Age | IPS | Escalated | Cycles | SUV Ratio | Deauville | SUV | Liver | Response | RT | RT resp | Relapse | PFS | Death | OS  | Rel prev site | Bx confirmed |
|-----|-----|-----|-----------|--------|-----------|-----------|-----|-------|----------|----|---------|---------|-----|-------|-----|---------------|--------------|
|     | 31  | 0-1 | ABVD      | 6      | >=1.3     | >=4       | 6.9 | 3.04  | POD      | 0  |         | 1       | 6   | 1     | 102 | 1             | 1            |

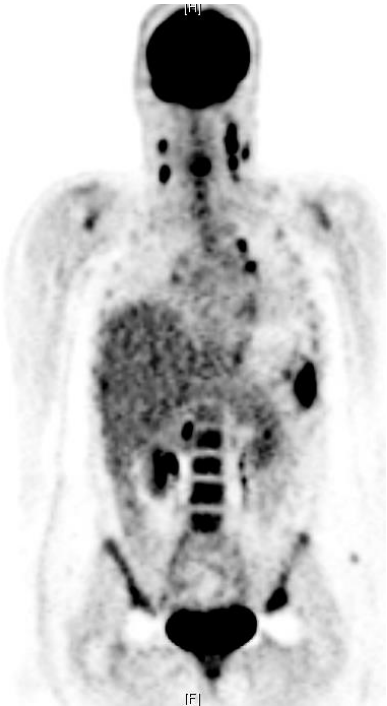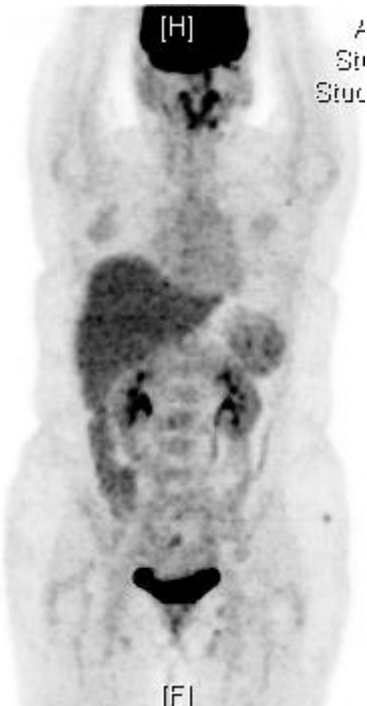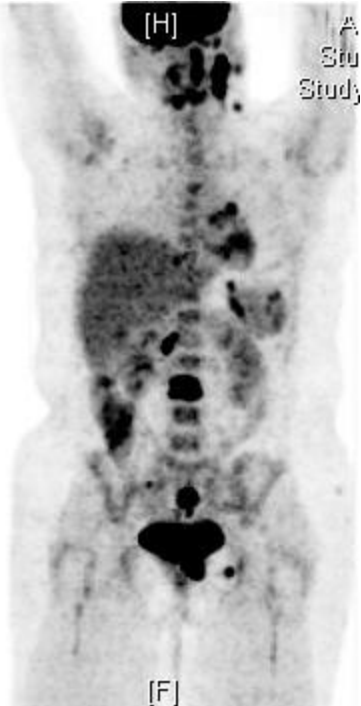

|                |
|----------------|
| Tx-2           |
| IVG + allo SCT |



| MRN | Age | IPS | Escalated | Cycles | SUV Ratio | Deauville | SUV | Liver | Response | RT | RT resp | Relapse | PFS | Death | OS | Rel prev site | Bx confirmed |
|-----|-----|-----|-----------|--------|-----------|-----------|-----|-------|----------|----|---------|---------|-----|-------|----|---------------|--------------|
|     | 22  | 0-1 | ABVD      | 4      | >=1.3     | >=4       | 4   | 1.7   | PR       | 0  |         | 1       | 4   | 0     | 54 | 1             | 1            |

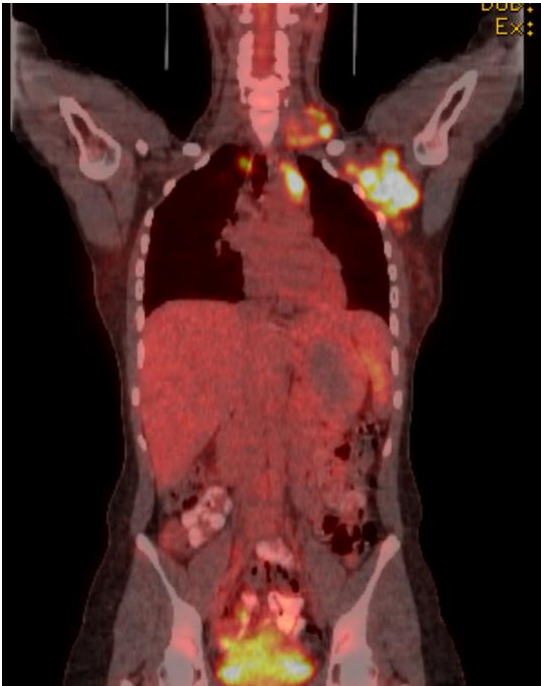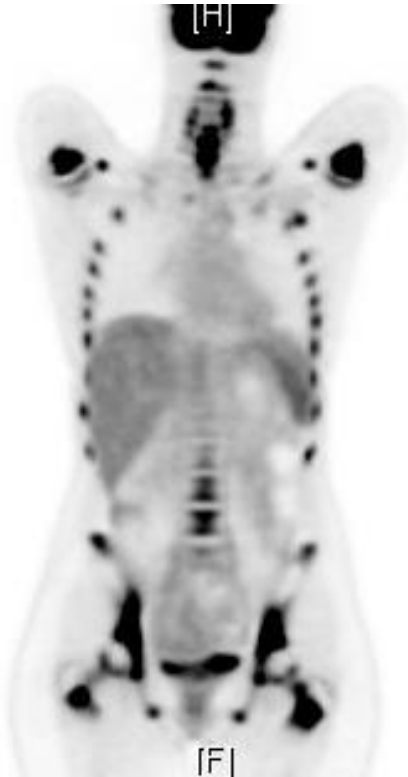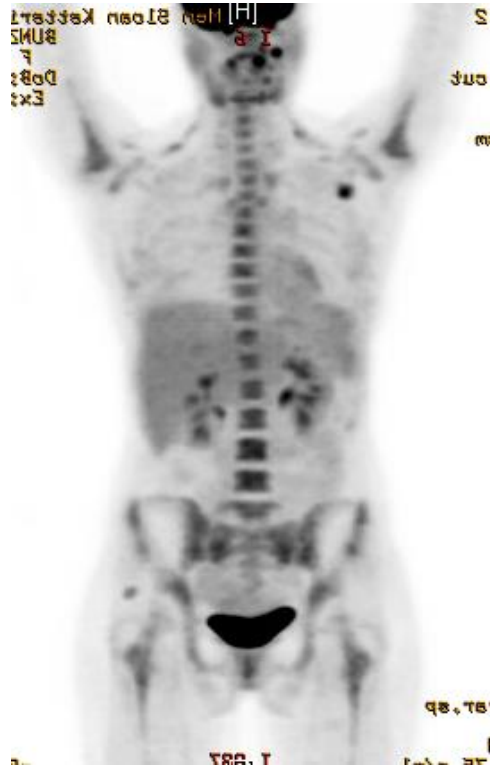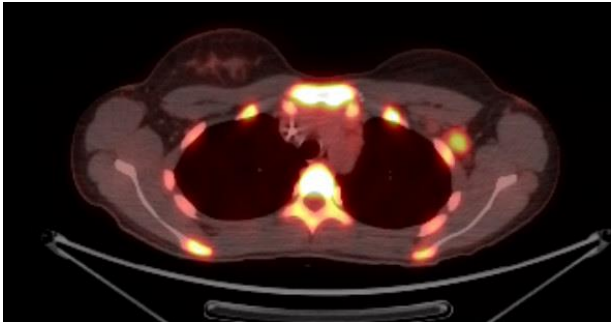

|             |
|-------------|
| Tx-2        |
| BV-ICE-ASCT |



| MRN | Age | IPS | Escalated | Cycles | SUV Ratio | Deauville | SUV | Liver | Response | RT | RT resp | Relapse | PFS | Death | OS | Rel prev site | Bx confirmed |
|-----|-----|-----|-----------|--------|-----------|-----------|-----|-------|----------|----|---------|---------|-----|-------|----|---------------|--------------|
|     | 65  | 4-7 | ABVD      | 6      | >=1.3     | >=4       | 3.7 | 2.55  | CR       | 0  |         | 1       | 25  | 1     | 86 | 1             | 1            |

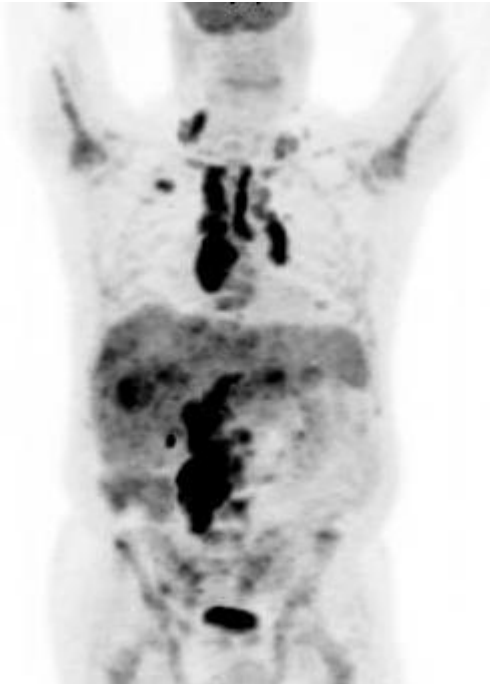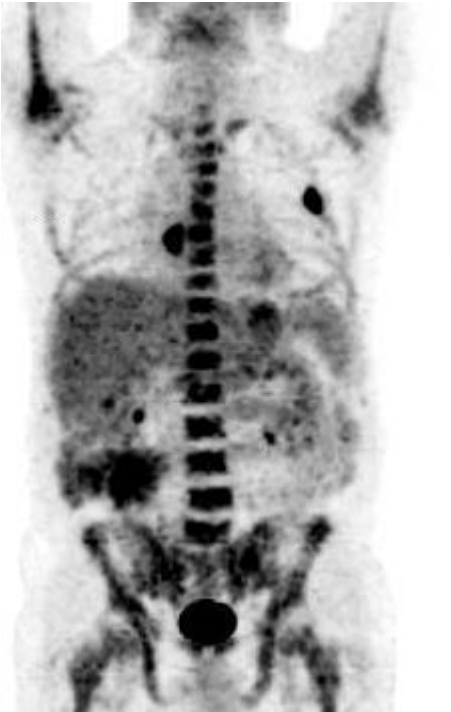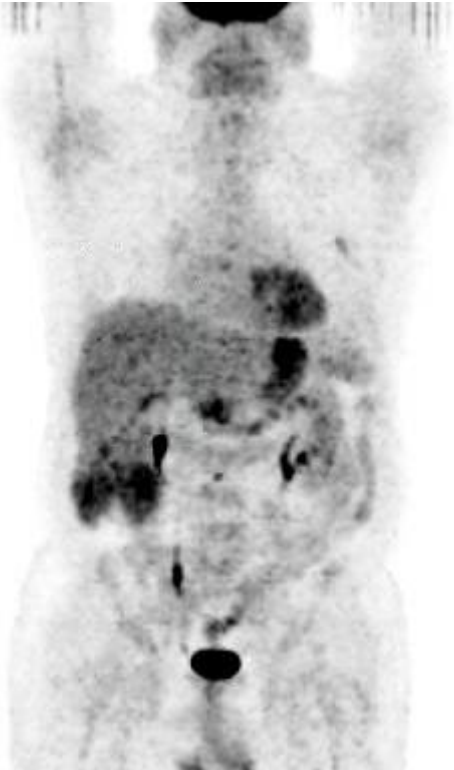

Note: relapse after 25m

|          |
|----------|
| Tx-2     |
| ICE-ASCT |

| MRN | Age | IPS | Escalated | Cycles | SUV Ratio  | Deauville | SUV | Liver | Response | RT | RT resp | Relapse | PFS | Death | OS | Rel prev site | Bx confirmed |
|-----|-----|-----|-----------|--------|------------|-----------|-----|-------|----------|----|---------|---------|-----|-------|----|---------------|--------------|
|     | 32  | 4-7 | ABVD      | 6      | $\geq 1.3$ | $\geq 4$  | 3.7 | 2.5   | CR       | 0  |         | 1       | 22  | 0     | 54 | 1             | 1            |

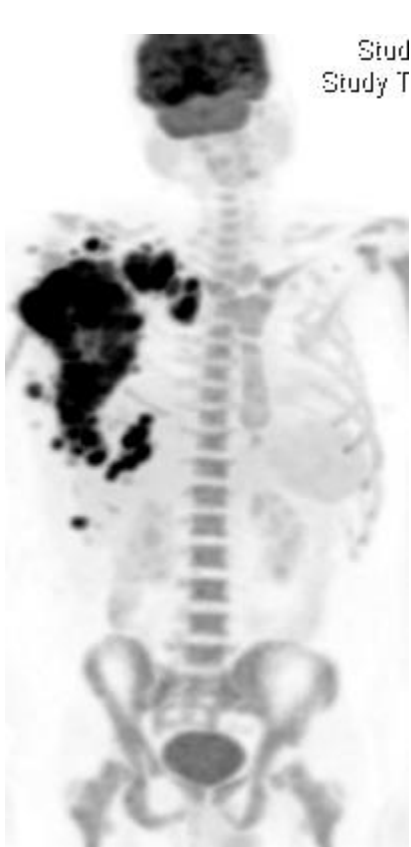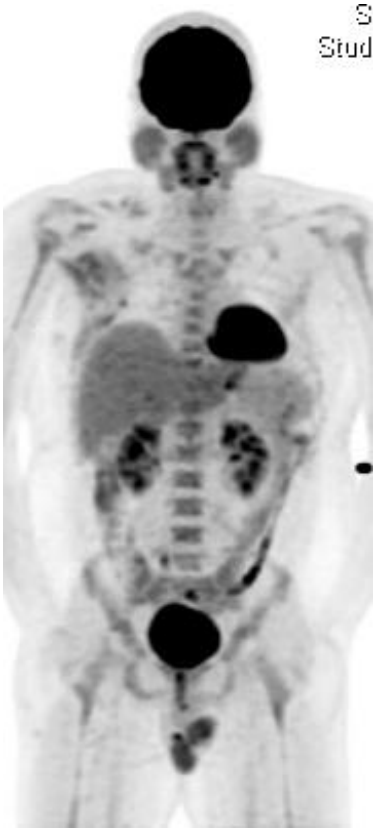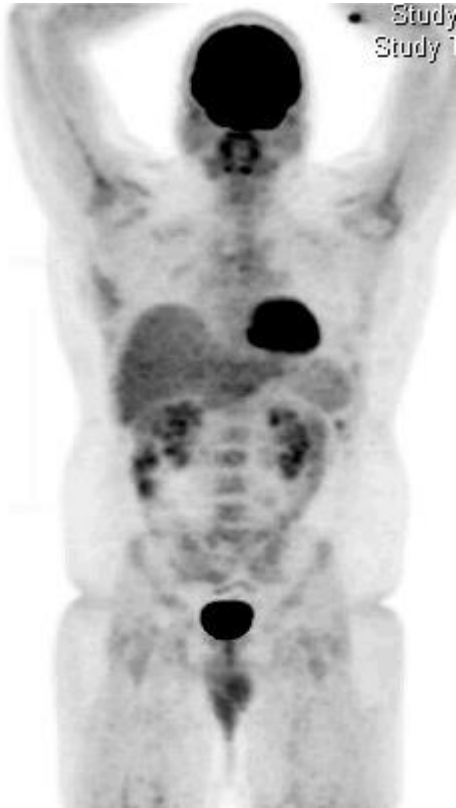

Note: relapse after 22m

|         |
|---------|
| Tx-2    |
| BV-ASCT |

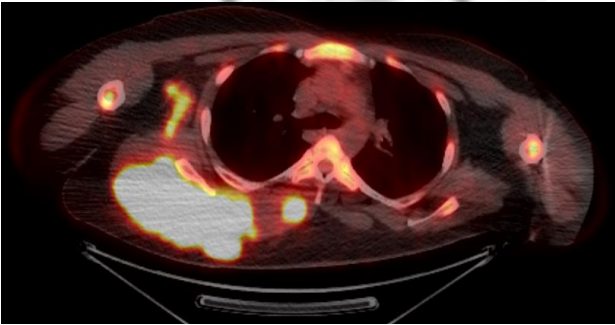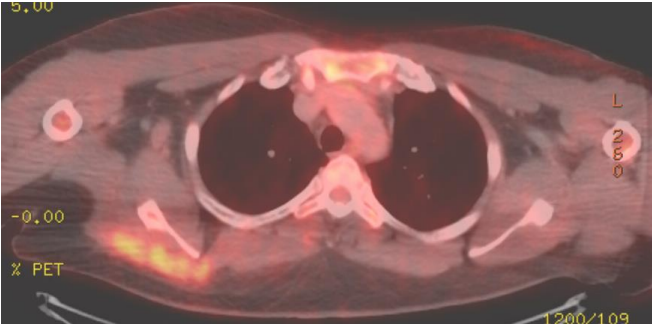

| MRN | Age | IPS | Escalated | Cycles | SUV Ratio | Deauville | SUV | Liver | Response | RT | RT resp | Relapse | PFS | Death | OS | Rel prev site | Bx confirmed |
|-----|-----|-----|-----------|--------|-----------|-----------|-----|-------|----------|----|---------|---------|-----|-------|----|---------------|--------------|
|     | 22  | 0-1 | ABVD      | 6      | >=1.3     | >=4       | 3.7 | 2     | POD      | 0  |         | 1       | 6   | 0     | 76 | 1             | 1            |

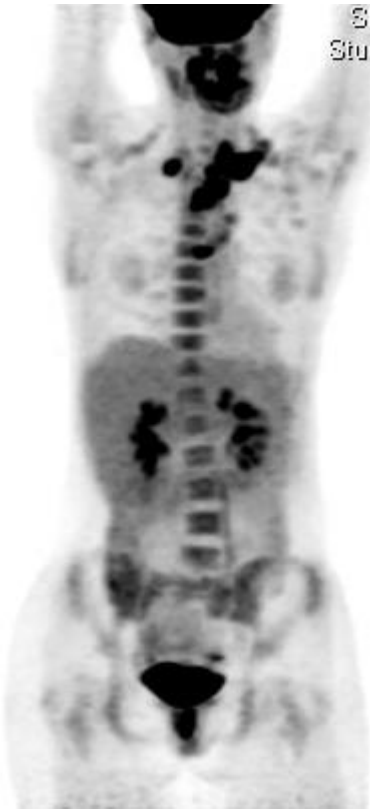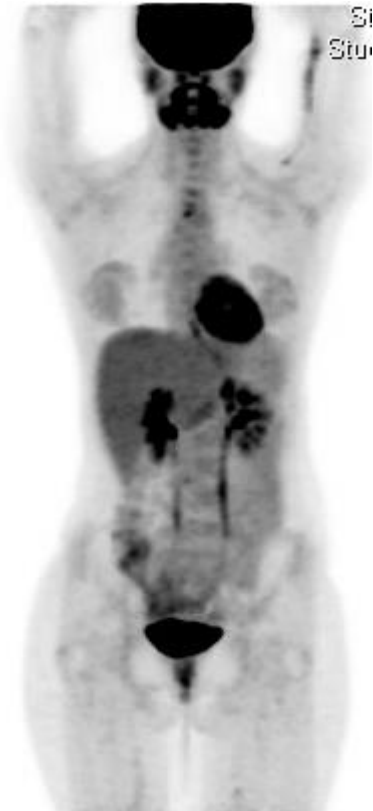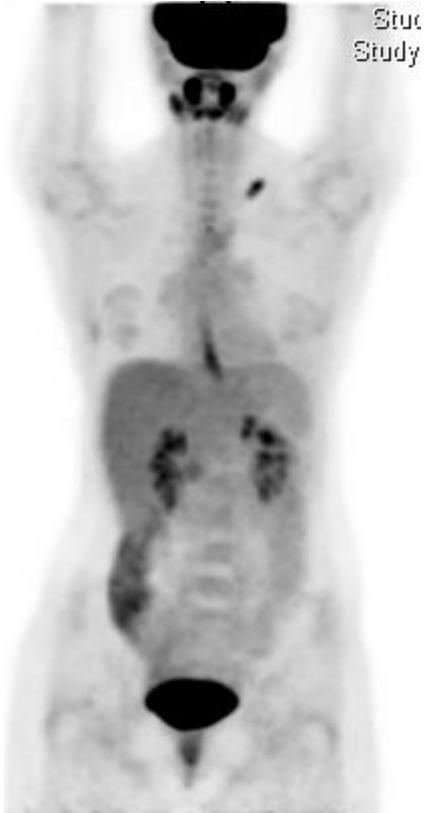

|             |
|-------------|
| Tx-2        |
| BV-ICE-ASCT |

qPET2+ by LLS only (dvPET2 -)  
Patients with POD

| MRN | Age | IPS | Escalated | Cycles | SUV Ratio  | Deauville | SUV | Liver | Response | RT | RT resp | Relapse | PFS | Death | OS | Rel prev site | Bx confirmed |
|-----|-----|-----|-----------|--------|------------|-----------|-----|-------|----------|----|---------|---------|-----|-------|----|---------------|--------------|
|     | 20  | 2-3 | ABVD      | 6      | $\geq 1.3$ | DV-1-3    | 2.7 | 1.8   | POD      | 0  |         | 1       | 6   | 0     | 66 | 1             | 1            |

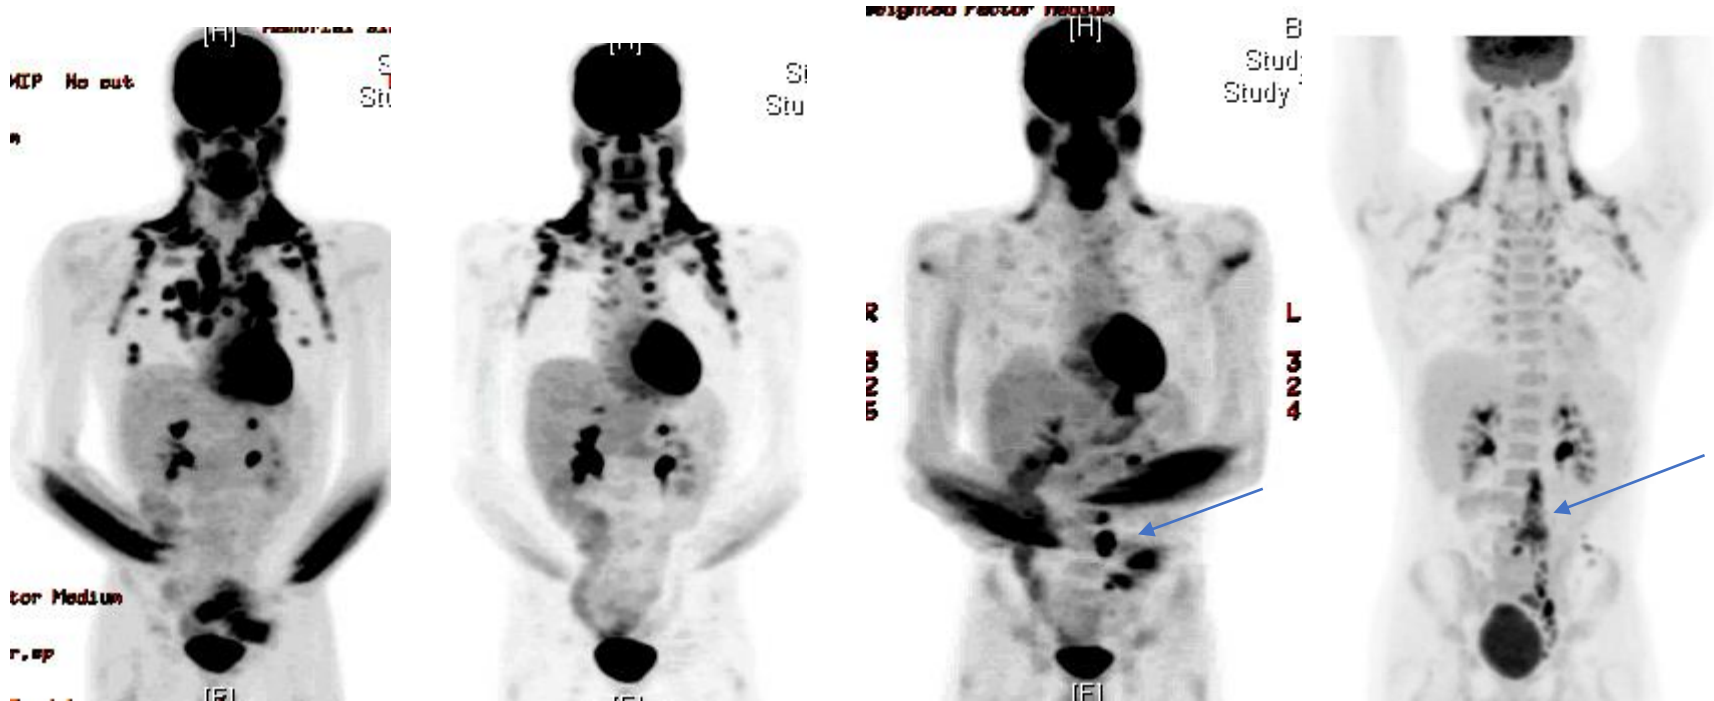

|             |
|-------------|
| Tx-2        |
| BV-ICE-ASCT |

| MRN | Age | IPS | Escalated | Cycles | SUV Ratio | Deauville | SUV | Liver | Response | RT | RT resp | Relapse | PFS | Death | OS | Rel prev site | Bx confirmed |
|-----|-----|-----|-----------|--------|-----------|-----------|-----|-------|----------|----|---------|---------|-----|-------|----|---------------|--------------|
|     | 34  | 4-7 | ABVD      | 6      | >=1.3     | DV-1-3    | 2.3 | 1.8   | POD      | 0  |         | 1       | 10  | 0     | 27 | 1             | 1            |

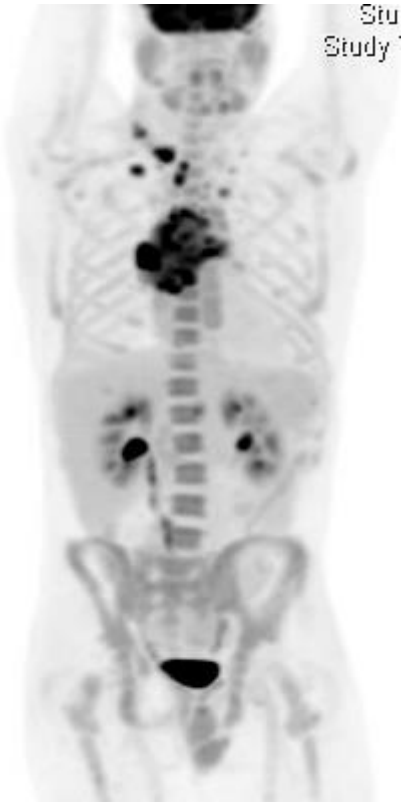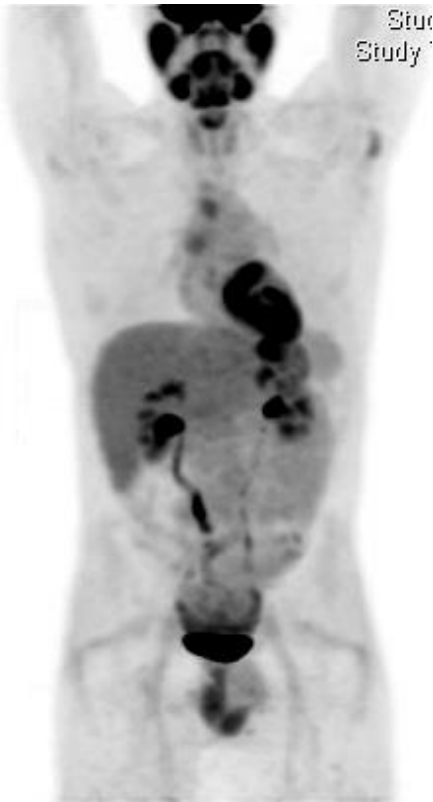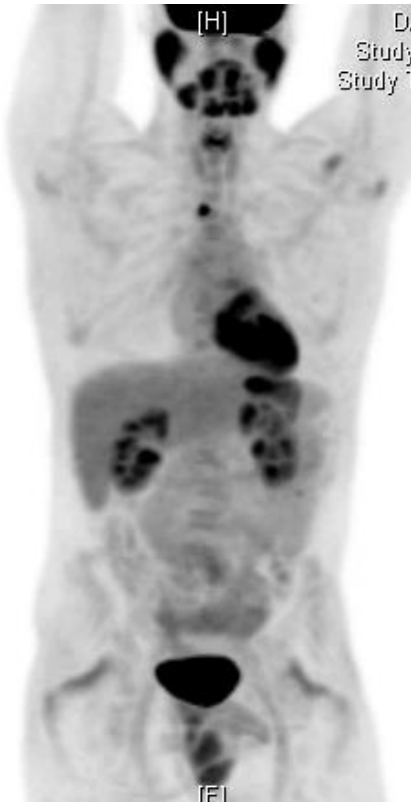

|          |
|----------|
| Tx-2     |
| ICE-ASCT |

| MRN | Age | IPS | Escalated | Cycles | SUV Ratio | Deauville | SUV | Liver | Response | RT | RT resp | Relapse | PFS | Death | OS | Rel prev site | Bx confirmed |
|-----|-----|-----|-----------|--------|-----------|-----------|-----|-------|----------|----|---------|---------|-----|-------|----|---------------|--------------|
|     | 31  | 0-1 | ABVD      | 6      | >=1.3     | DV-1-3    | 2.8 | 1.9   | POD      | 0  |         | 1       | 9   | 0     | 47 | 1             | 1            |

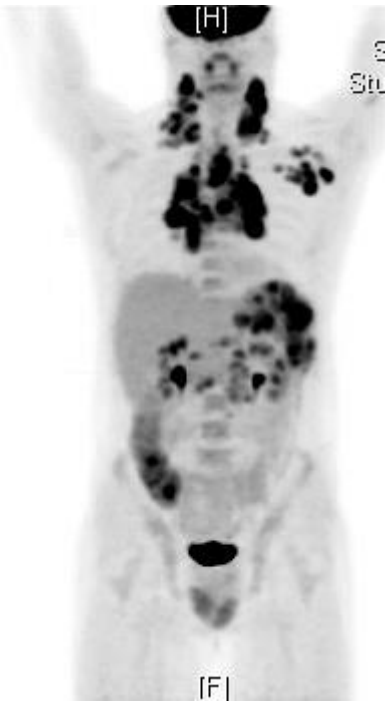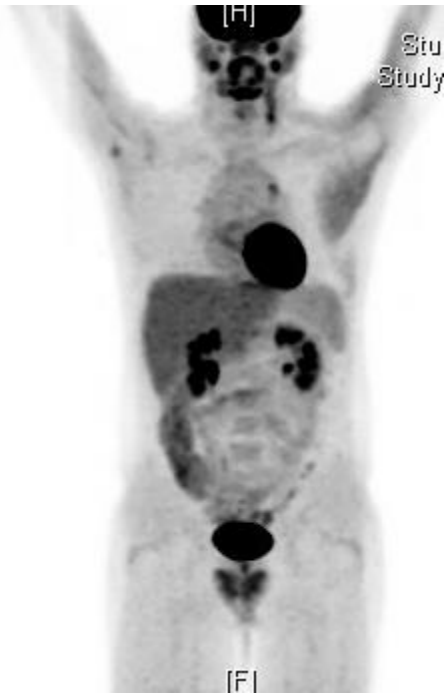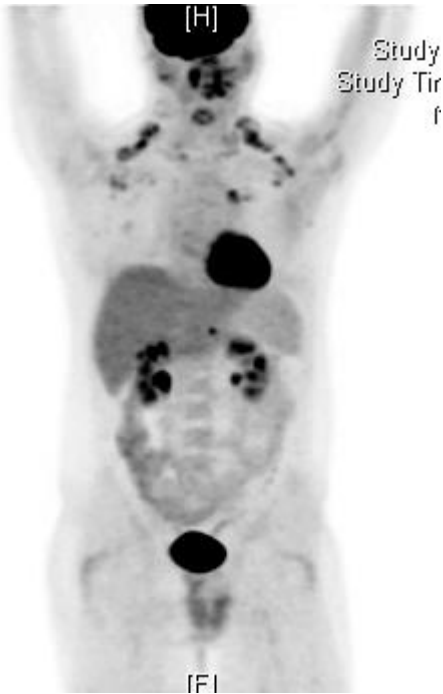

|          |
|----------|
| Tx-2     |
| ICE-ASCT |



| MRN | Age | IPS | Escalated | Cycles | SUV Ratio | Deauville | SUV | Liver | Response | RT | RT resp | Relapse | PFS | Death | OS | Rel prev site | Bx confirmed |
|-----|-----|-----|-----------|--------|-----------|-----------|-----|-------|----------|----|---------|---------|-----|-------|----|---------------|--------------|
|     | 36  | 0-1 | ABVD      | 6      | >=1.3     | DV-1-3    | 3.3 | 2.5   | PR       | 1  | CR      | 1       | 16  | 0     | 51 | 1             | 1            |

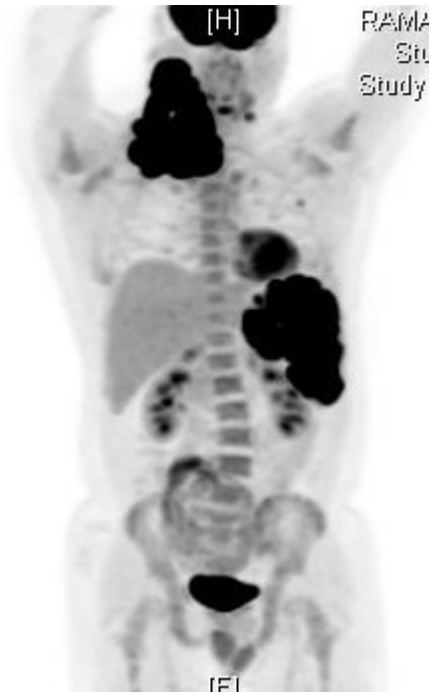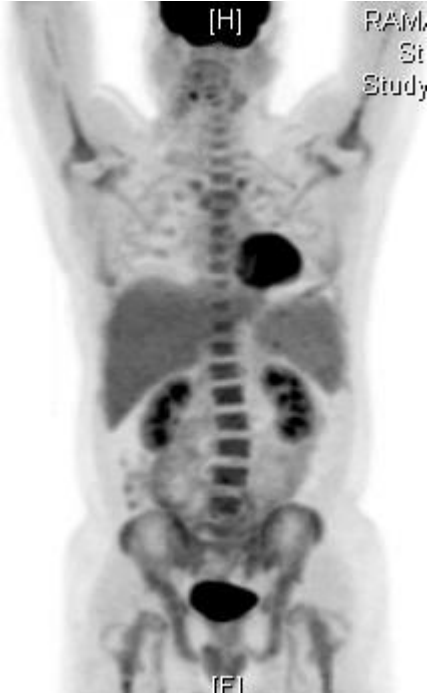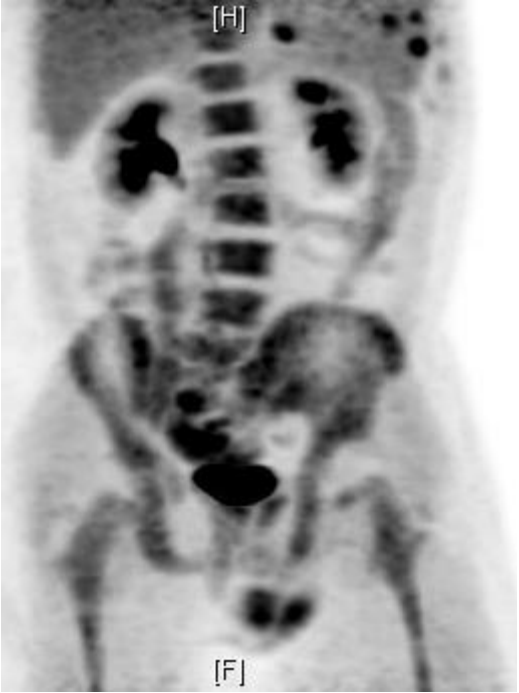

|                     |
|---------------------|
| Tx 2                |
| BV+nivolumab - ASCT |

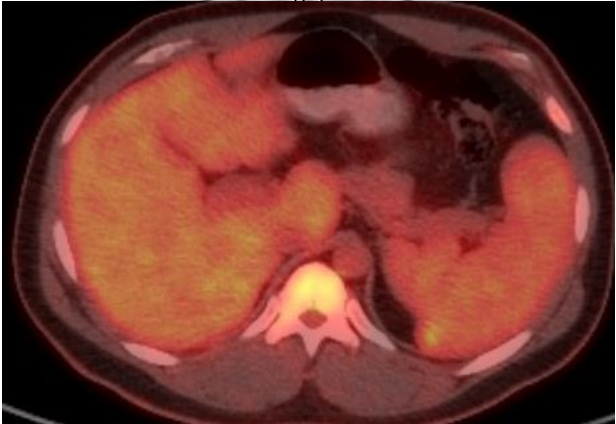

Residual mild tiny focal areas of hypermetabolism in the spleen with maximum SUV 3.3 compared to 26.

| MRN | Age | IPS | Escalated | Cycles | SUV Ratio  | Deauville | SUV | Liver | Response | RT | RT resp | Relapse | PFS | Death | OS | Rel prev site | Bx confirmed |
|-----|-----|-----|-----------|--------|------------|-----------|-----|-------|----------|----|---------|---------|-----|-------|----|---------------|--------------|
|     | 32  | 0-1 | ABVD      | 6      | $\geq 1.3$ | DV-1-3    | 3.8 | 2.4   | PR       | 0  |         | 1       | 9   | 0     | 91 | 1             | 1            |

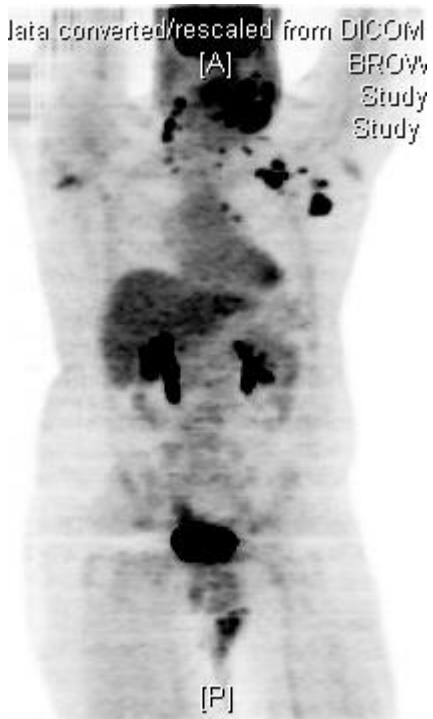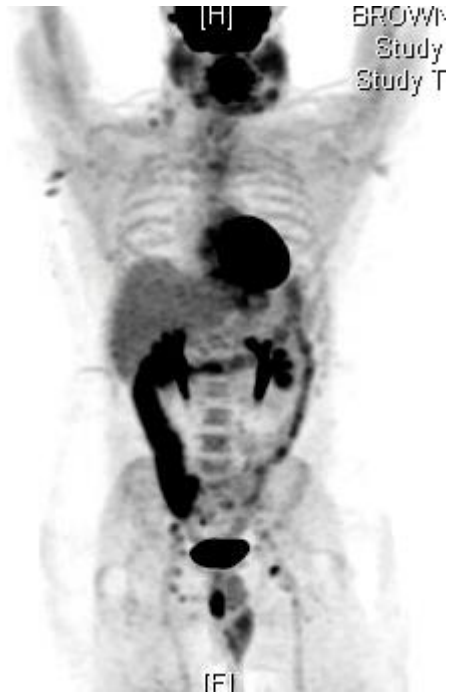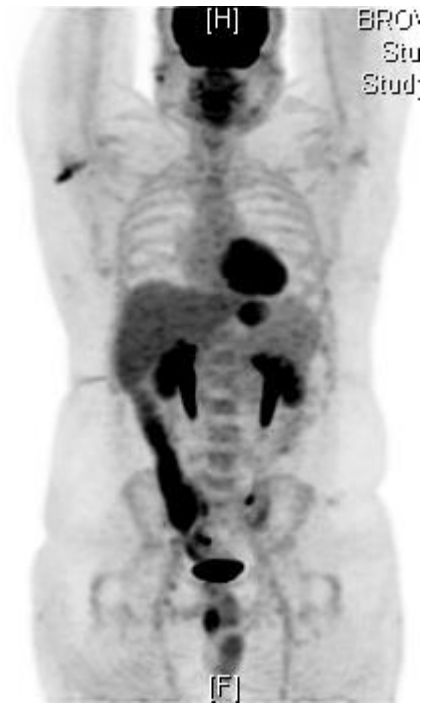

|            |
|------------|
| Tx 2       |
| R-da-EPOCH |

| MRN | Age | IPS | Escalated | Cycles | SUV Ratio | Deauville | SUV | Liver | Response | RT | RT resp | Relapse | PFS | Death | OS | Rel prev site | Bx confirmed |
|-----|-----|-----|-----------|--------|-----------|-----------|-----|-------|----------|----|---------|---------|-----|-------|----|---------------|--------------|
|     | 43  | 2-3 | ABVD      | 6      | >=1.3     | DV-1-3    | 2.2 | 1.68  | PR       | 0  |         | 1       | 49  | 0     | 88 | 1             | 1            |

OSH

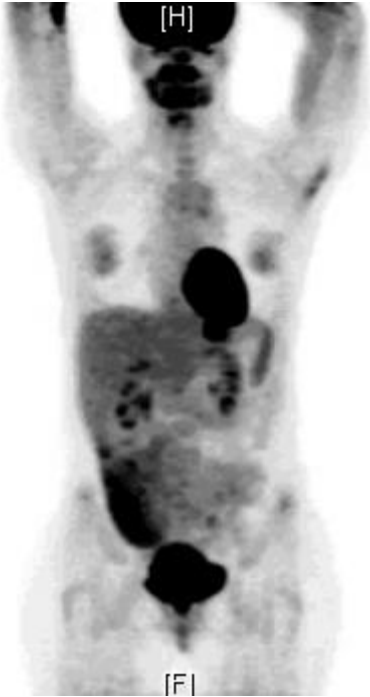

Interim only

EOT - CT

|          |
|----------|
| Tx-2     |
| ICE-ASCT |

| MRN | Age | IPS | Escalated | Cycles | SUV Ratio | Deauville | SUV  | Liver | Response | RT | RT resp | Relapse | PFS | Death | OS | Rel prev site | Bx confirmed |
|-----|-----|-----|-----------|--------|-----------|-----------|------|-------|----------|----|---------|---------|-----|-------|----|---------------|--------------|
|     | 64  | 4-7 | ABVD      | 6      | >=1.3     | DV-1-3    | 3.53 | 2.9   | TRM      | 0  |         | 0       | 6   | 1     | 6  |               |              |

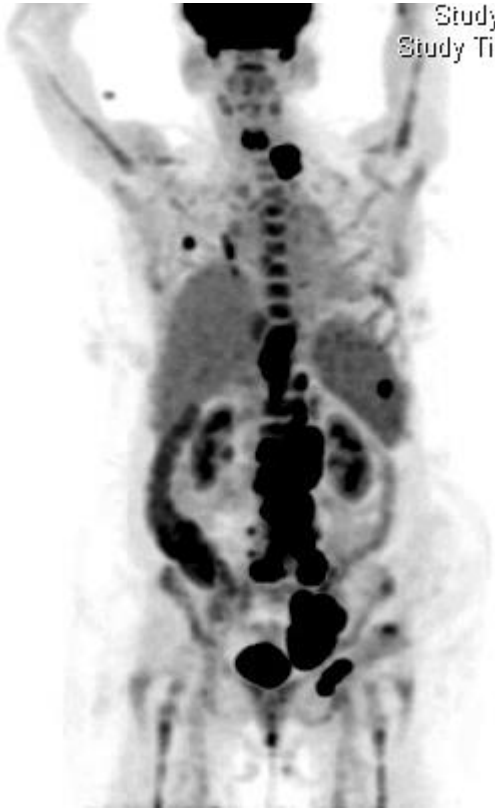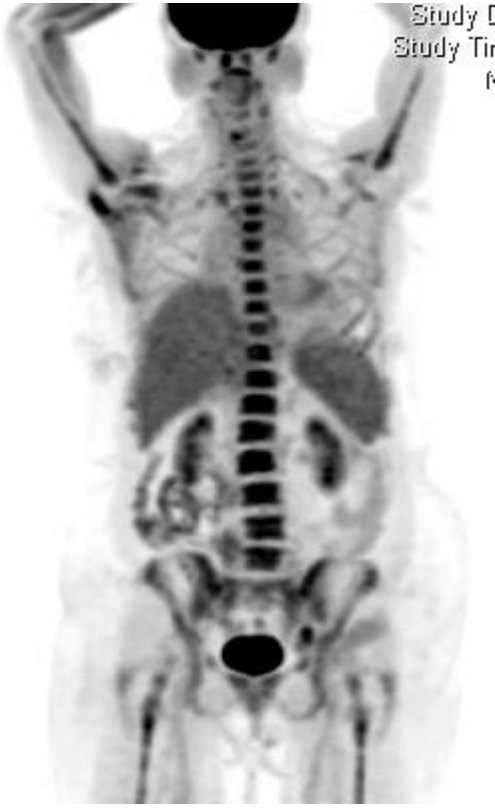

TRM

qPET2+ by LLS only (dvPET2-)  
Patients with long term remission

| MRN | Age | IPS | Escalated | Cycles | SUV Ratio | Deauville | SUV | Liver | Response | RT | RT resp | Relapse | PFS | Death | OS | Rel prev site | Bx confirmed |
|-----|-----|-----|-----------|--------|-----------|-----------|-----|-------|----------|----|---------|---------|-----|-------|----|---------------|--------------|
|     | 87  | 2-3 | ABVD      | 6      | >=1.3     | DV-1-3    | 4.5 | 2.56  | CR       | 0  |         | 0       | 11  | 0     | 11 |               |              |

OSH

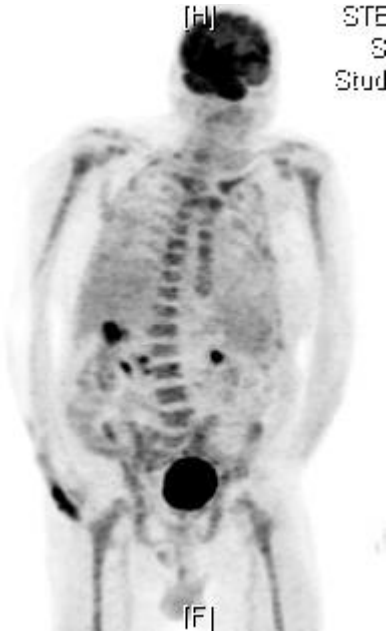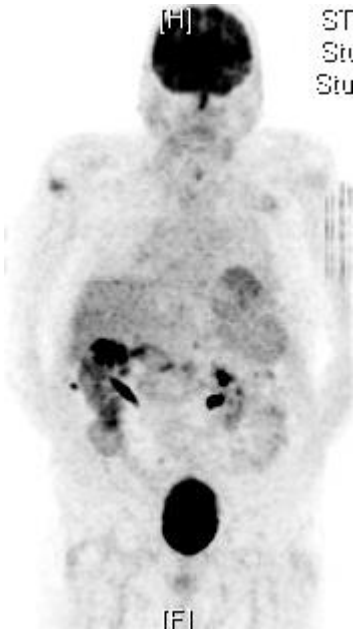

| MRN | Age | IPS | Escalated | Cycles | SUV Ratio | Deauville | SUV | Liver | Response | RT | RT resp | Relapse | PFS | Death | OS | Rel prev site | Bx confirmed |
|-----|-----|-----|-----------|--------|-----------|-----------|-----|-------|----------|----|---------|---------|-----|-------|----|---------------|--------------|
|     | 56  | 2-3 | ABVD      | 6      | >=1.3     | DV-1-3    | 2.9 | 2.2   | CR       | 0  |         | 0       | 83  | 0     | 83 |               |              |

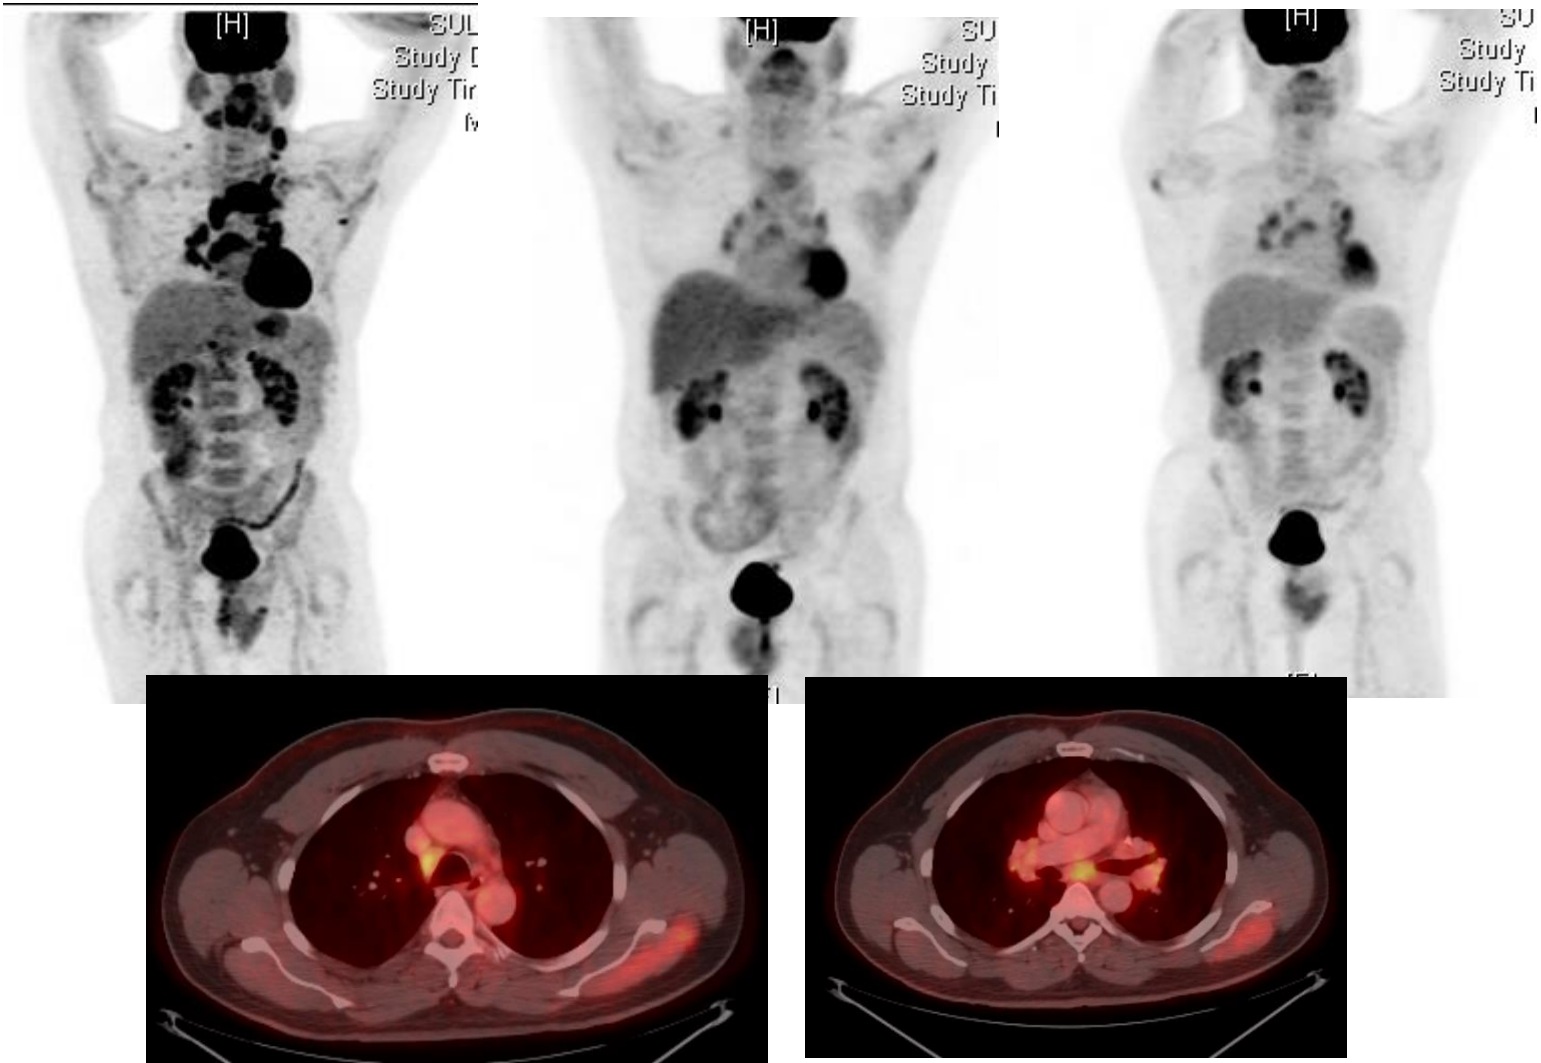



| MRN | Age | IPS | Escalated | Cycles | SUV Ratio | Deauville | SUV | Liver | Response | RT | RT resp | Relapse | PFS | Death | OS | Rel prev site | Bx confirmed |
|-----|-----|-----|-----------|--------|-----------|-----------|-----|-------|----------|----|---------|---------|-----|-------|----|---------------|--------------|
|     | 19  | 0-1 | ABVD      | 6      | >=1.3     | DV-1-3    | 2.8 | 1.6   | CR       | 0  |         | 0       | 51  | 0     | 51 |               |              |

OSH

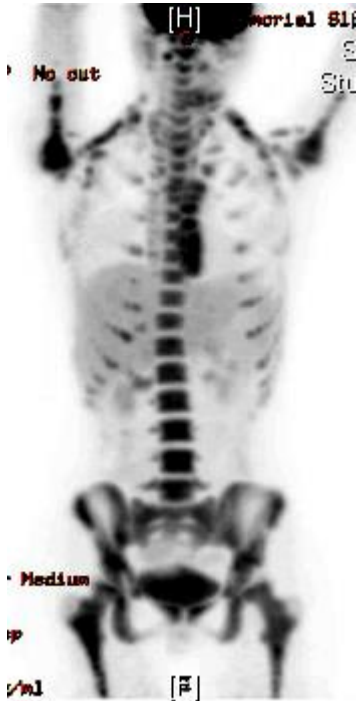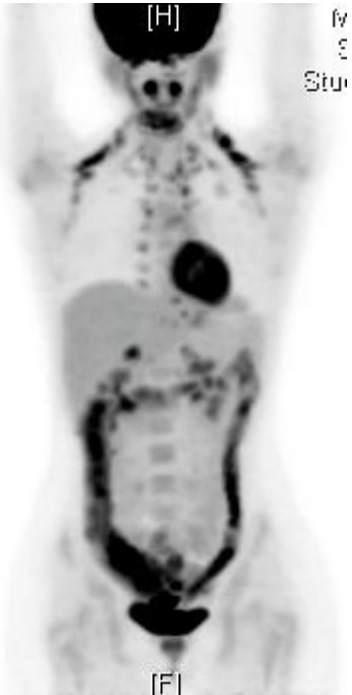

| MRN | Age | IPS | Escalated | Cycles | SUV Ratio | Deauville | SUV | Liver | Response | RT | RT resp | Relapse | PFS | Death | OS | Rel prev site | Bx confirmed |
|-----|-----|-----|-----------|--------|-----------|-----------|-----|-------|----------|----|---------|---------|-----|-------|----|---------------|--------------|
|     | 32  | 2-3 | ABVD      | 6      | >=1.3     | DV-1-3    | 3.6 | 2.8   | CR       | 0  |         | 0       | 32  | 0     | 32 |               |              |

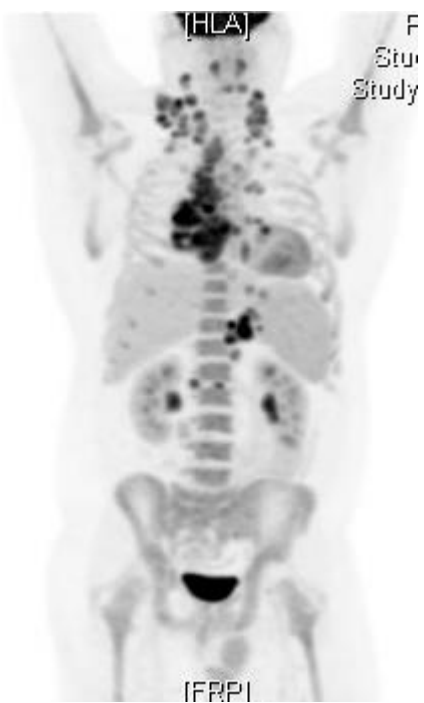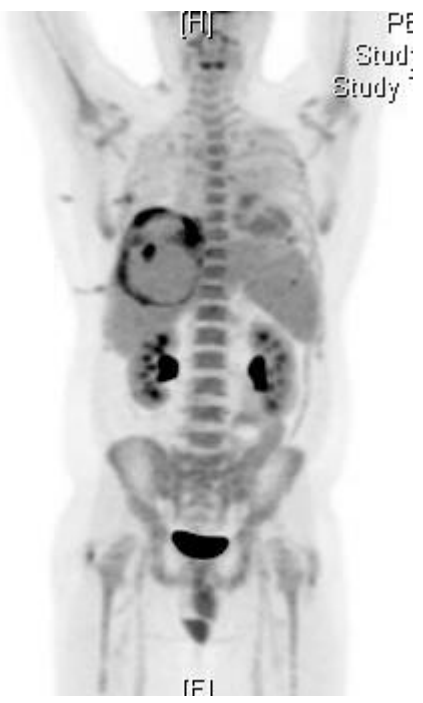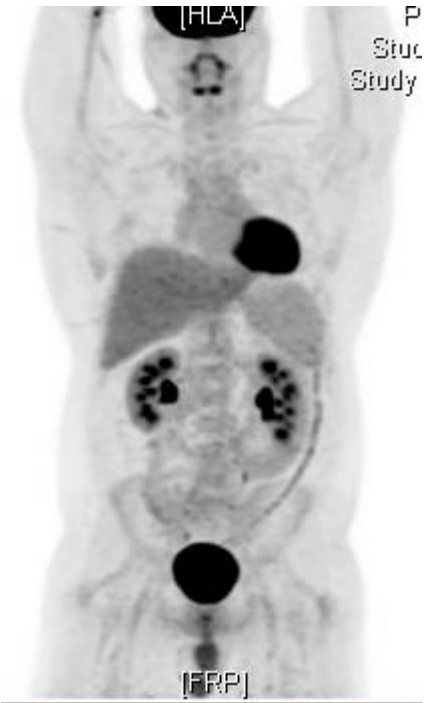

| MRN | Age | IPS | Escalated | Cycles | SUV Ratio | Deauville | SUV | Liver | Response | RT | RT resp | Relapse | PFS | Death | OS | Rel prev site | Bx confirmed |
|-----|-----|-----|-----------|--------|-----------|-----------|-----|-------|----------|----|---------|---------|-----|-------|----|---------------|--------------|
|     | 35  | 2-3 | ABVD      | 6      | >=1.3     | DV-1-3    | 2.5 | 1.9   | CR       | 0  |         | 0       | 50  | 0     | 50 |               |              |

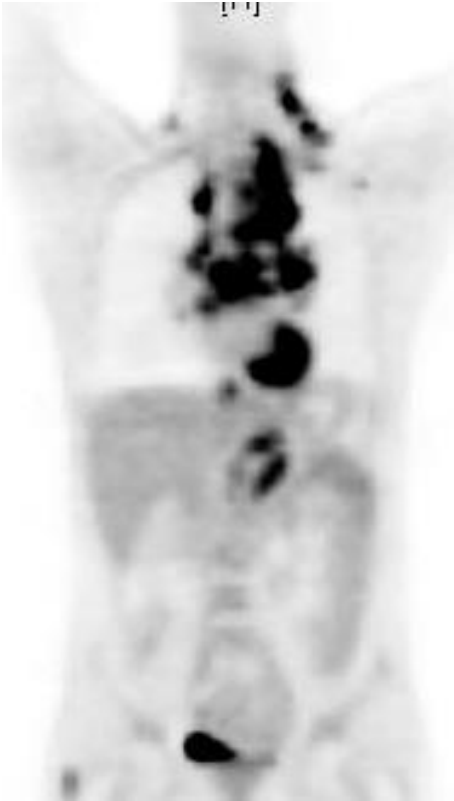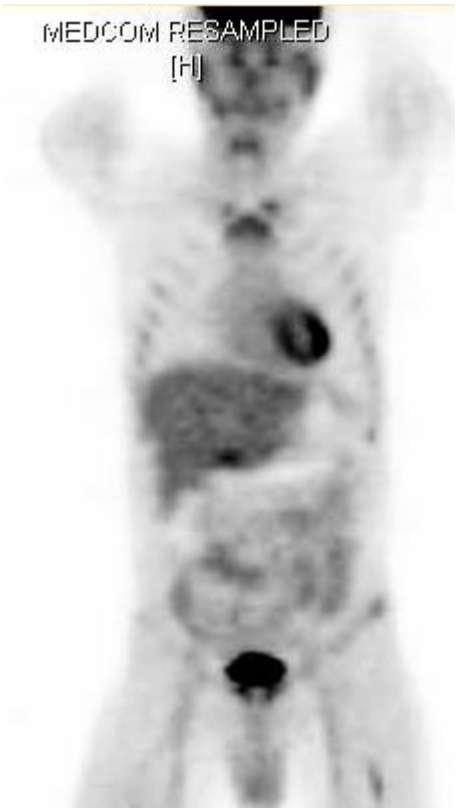

EOT - CT

| MRN | Age | IPS | Escalated | Cycles | SUV Ratio | Deauville | SUV | Liver | Response | RT | RT resp | Relapse | PFS | Death | OS | Rel prev site | Bx confirmed |
|-----|-----|-----|-----------|--------|-----------|-----------|-----|-------|----------|----|---------|---------|-----|-------|----|---------------|--------------|
|     | 47  | 4-7 | ABVD      | 6      | >=1.3     | DV-1-3    | 2.3 | 1.6   | CR       | 0  |         | 0       | 27  | 0     | 27 |               |              |

OSH

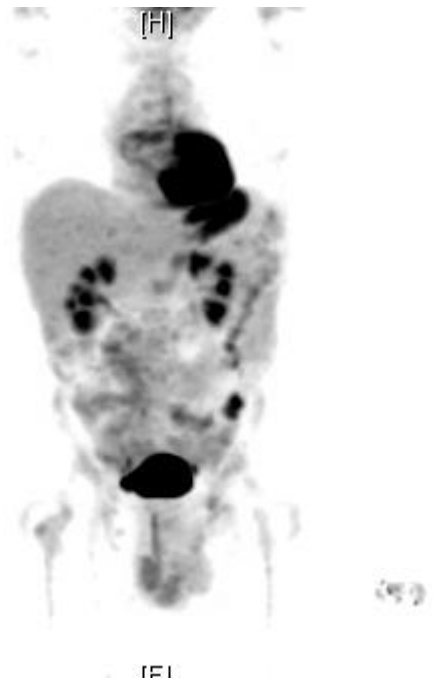

OSH

Only interim PET is available

| MRN | Age | IPS | Escalated | Cycles | SUV Ratio | Deauville | SUV | Liver | Response | RT | RT resp | Relapse | PFS | Death | OS | Rel prev site | Bx confirmed |
|-----|-----|-----|-----------|--------|-----------|-----------|-----|-------|----------|----|---------|---------|-----|-------|----|---------------|--------------|
|     | 19  | 0-1 | ABVD      | 6      | >=1.3     | DV-1-3    | 4.4 | 1.8   | CR       | 0  |         | 0       | 66  | 0     | 66 |               |              |

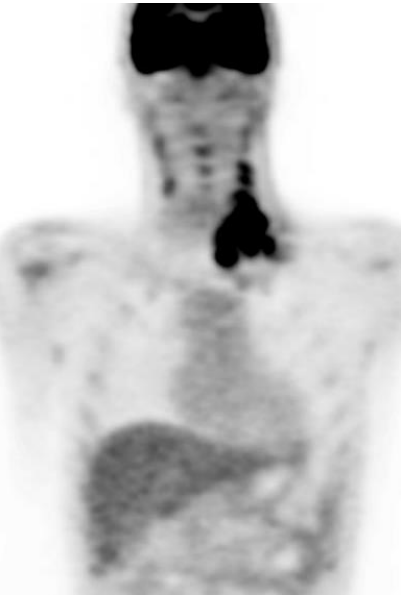

+ splenic  
lesion not  
visible on this  
section

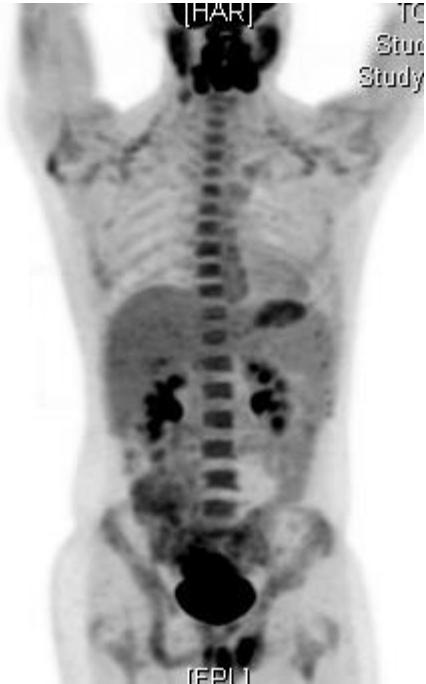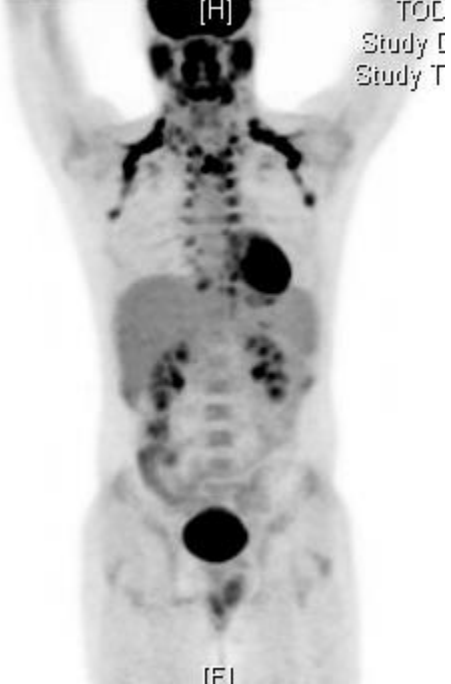

| MRN | Age | IPS | Escalated | Cycles | SUV Ratio | Deauville | SUV | Liver | Response | RT | RT resp | Relapse | PFS | Death | OS | Rel prev site | Bx confirmed |
|-----|-----|-----|-----------|--------|-----------|-----------|-----|-------|----------|----|---------|---------|-----|-------|----|---------------|--------------|
|     | 36  | 4-7 | ABVD      | 6      | >=1.3     | DV-1-3    | 1.4 | 2     | CR       | 0  |         | 0       | 66  | 0     | 66 |               |              |

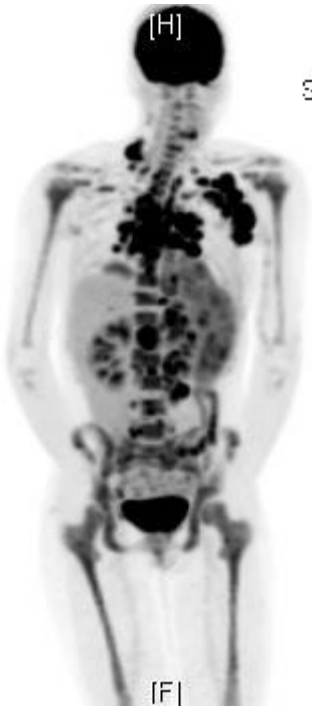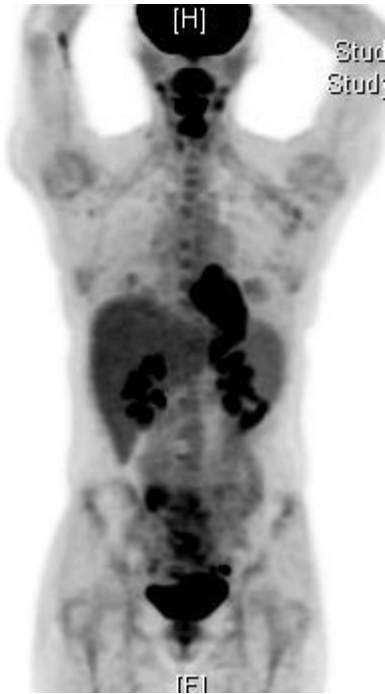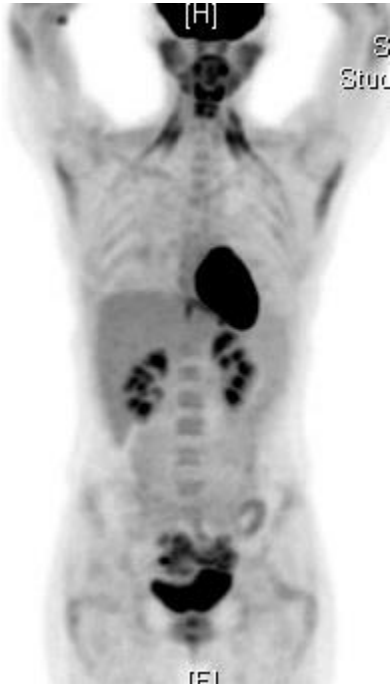

| MRN | Age | IPS | Escalated | Cycles | SUV Ratio  | Deauville | SUV | Liver | Response | RT | RT resp | Relapse | PFS | Death | OS | Rel prev site | Bx confirmed |
|-----|-----|-----|-----------|--------|------------|-----------|-----|-------|----------|----|---------|---------|-----|-------|----|---------------|--------------|
|     | 27  | 2-3 | ABVD      | 6      | $\geq 1.3$ | DV-1-3    | 2.8 | 2     | CR       | 0  |         | 0       | 38  | 0     | 38 |               |              |

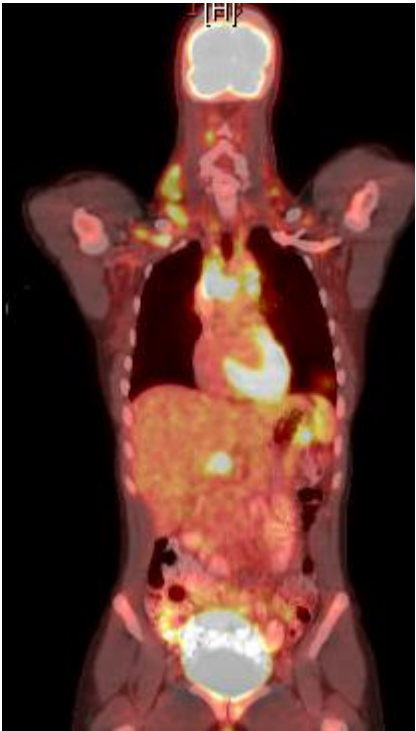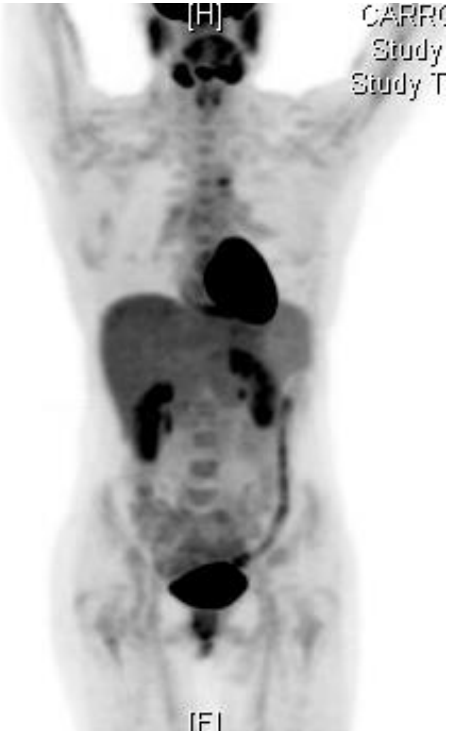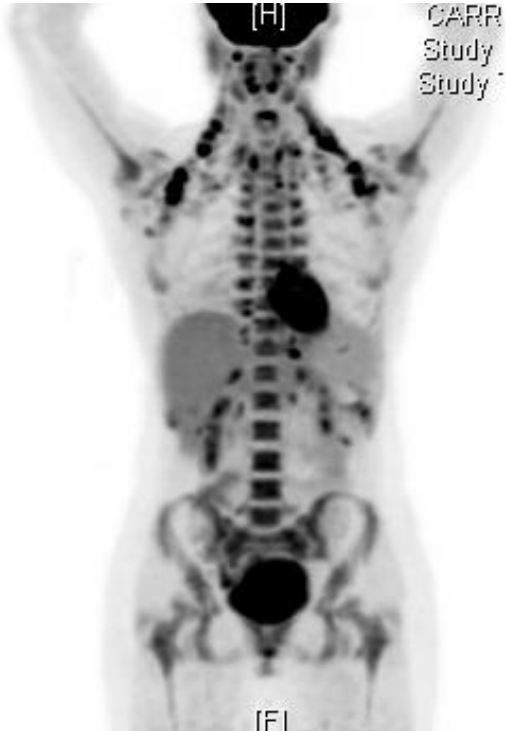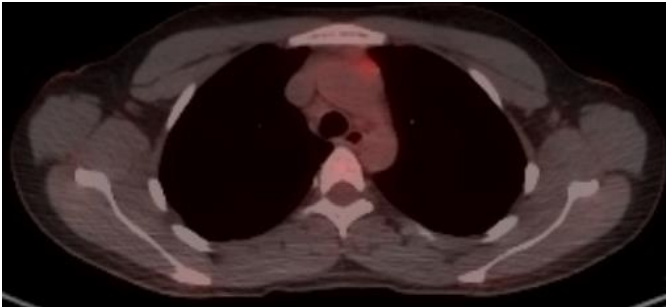



| MRN | Age | IPS | Escalated | Cycles | SUV Ratio  | Deauville | SUV | Liver | Response | RT | RT resp | Relapse | PFS | Death | OS | Rel prev site | Bx confirmed |
|-----|-----|-----|-----------|--------|------------|-----------|-----|-------|----------|----|---------|---------|-----|-------|----|---------------|--------------|
|     | 32  | 2-3 | ABVD      | 6      | $\geq 1.3$ | DV-1-3    | 3.1 | 2.4   | CR       | 0  |         | 0       | 32  | 0     | 32 |               |              |

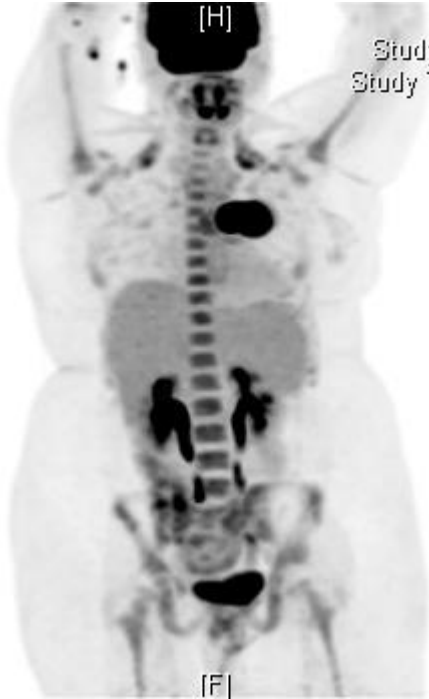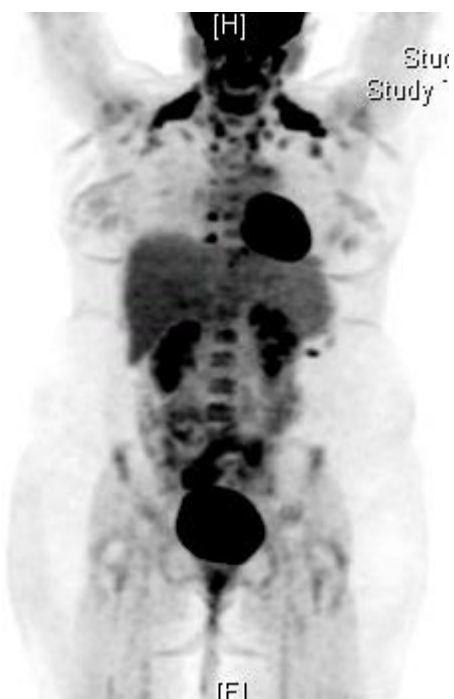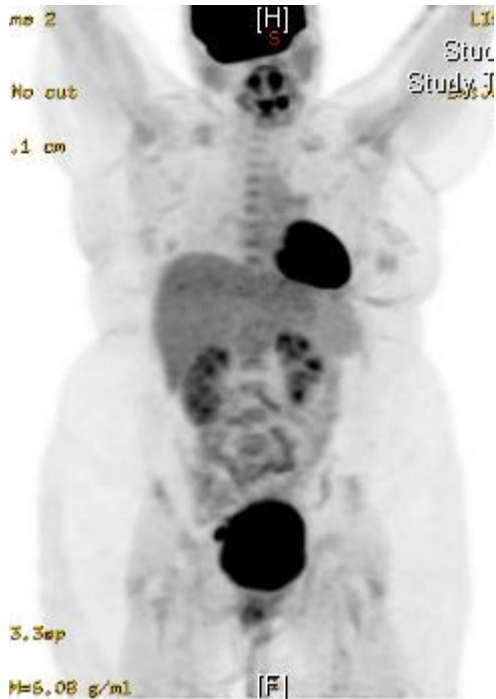

| MRN | Age | IPS | Escalated | Cycles | SUV Ratio | Deauville | SUV | Liver | Response | RT | RT resp | Relapse | PFS | Death | OS | Rel prev site | Bx confirmed |
|-----|-----|-----|-----------|--------|-----------|-----------|-----|-------|----------|----|---------|---------|-----|-------|----|---------------|--------------|
|     | 59  | 2-3 | ABVD      | 6      | >=1.3     | DV-1-3    | 9.6 | 3.1   | CR       | 0  |         | 0       | 81  | 0     | 81 |               |              |

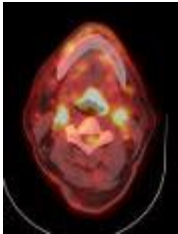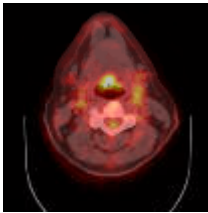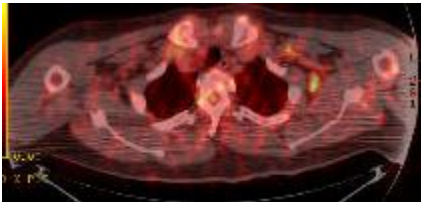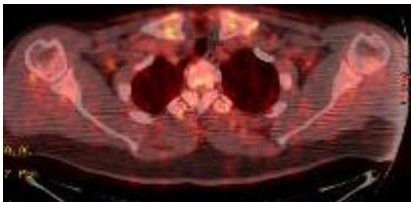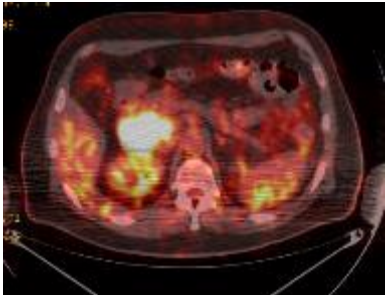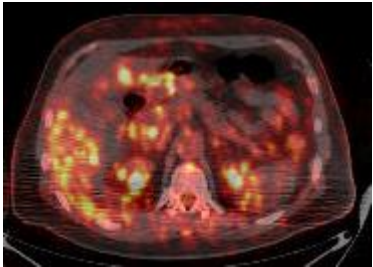

portocaval mass anterior to the right kidney 5.7cm SUVmax 9.6  
aortocaval lymph node, which has increased SUV of 7.1

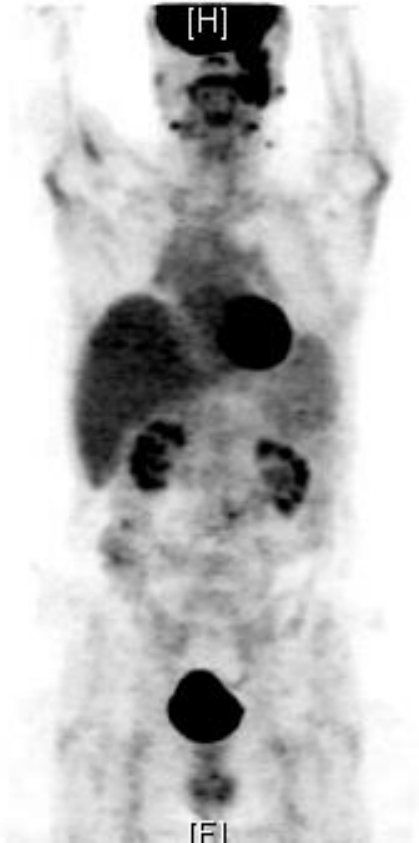

Hypermetabolic left masseter and pterygoid muscles SUV 6.9. All sites of initial disease resolved

| MRN | Age | IPS | Escalated | Cycles | SUV Ratio | Deauville | SUV | Liver | Response | RT | RT resp | Relapse | PFS | Death | OS | Rel prev site | Bx confirmed |
|-----|-----|-----|-----------|--------|-----------|-----------|-----|-------|----------|----|---------|---------|-----|-------|----|---------------|--------------|
|     | 36  | 4-7 | ABVD      | 6      | >=1.3     | DV-1-3    | 3.6 | 2.2   | CR       | 1  |         | 0       | 42  | 0     | 42 |               |              |

OSH

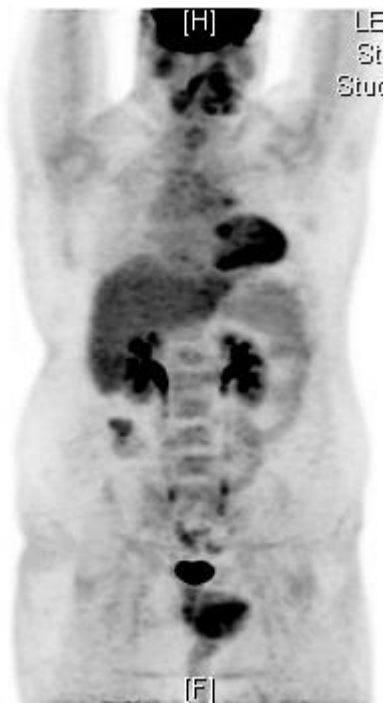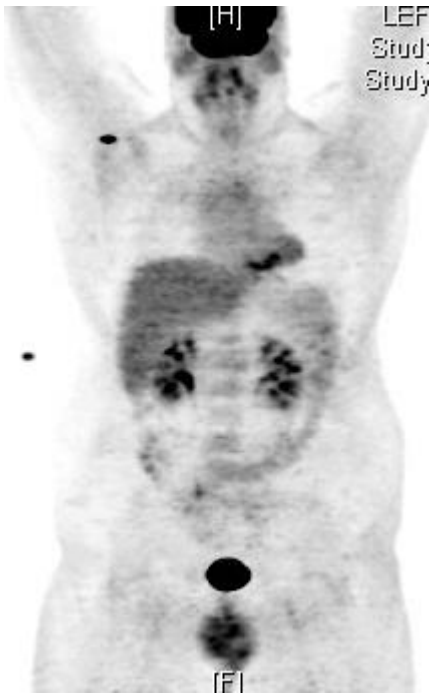

| MRN | Age | IPS | Escalated | Cycles | SUV Ratio | Deauville | SUV | Liver | Response | RT | RT resp | Relapse | PFS | Death | OS | Rel prev site | Bx confirmed |
|-----|-----|-----|-----------|--------|-----------|-----------|-----|-------|----------|----|---------|---------|-----|-------|----|---------------|--------------|
|     | 44  | 2-3 | ABVD      | 6      | >=1.3     | DV-1-3    | 3.9 | 1.9   | PR       | 1  | CR      | 0       | 23  | 0     | 23 |               |              |

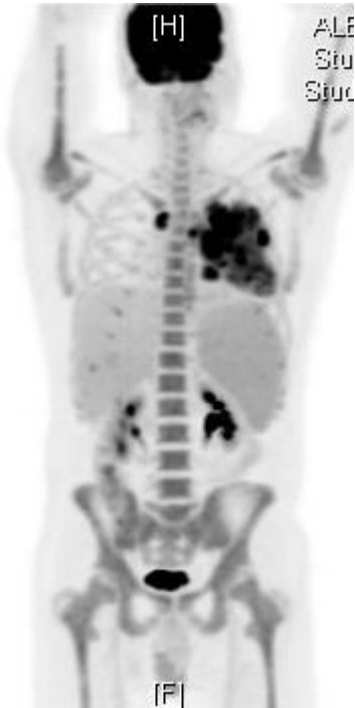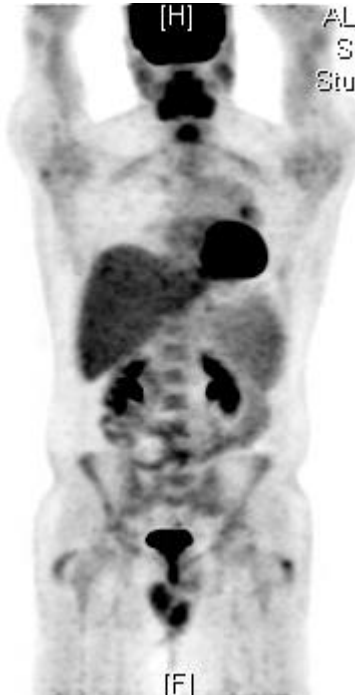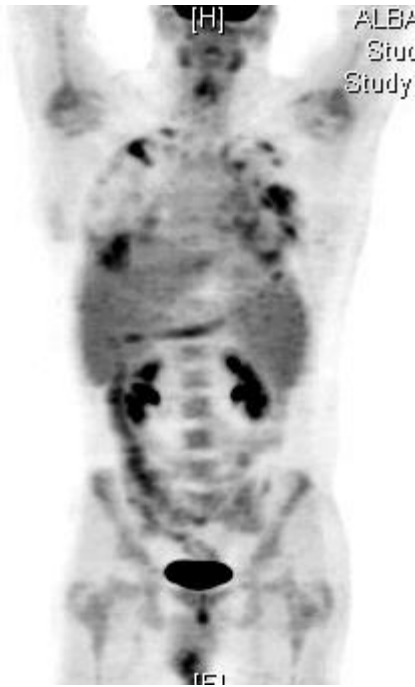

| MRN | Age | IPS | Escalated | Cycles | SUV Ratio  | Deauville | SUV | Liver | Response | RT | RT resp | Relapse | PFS | Death | OS | Rel prev site | Bx confirmed |
|-----|-----|-----|-----------|--------|------------|-----------|-----|-------|----------|----|---------|---------|-----|-------|----|---------------|--------------|
|     | 24  | 0-1 | ABVD      | 5      | $\geq 1.3$ | DV-1-3    | 3   | 1.9   | CR       | 1  | CR      | 0       | 68  | 0     | 68 |               |              |

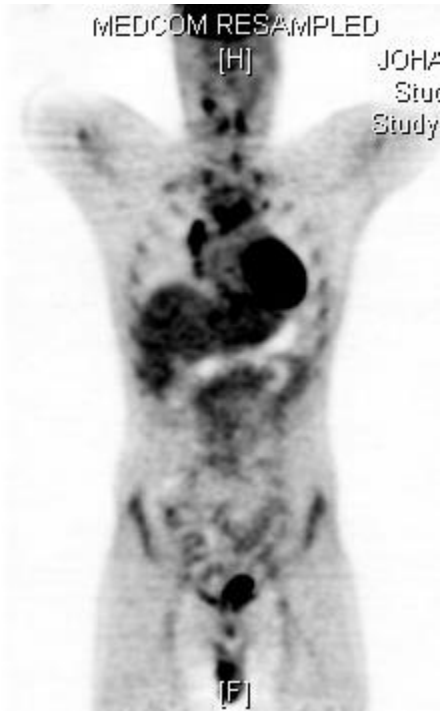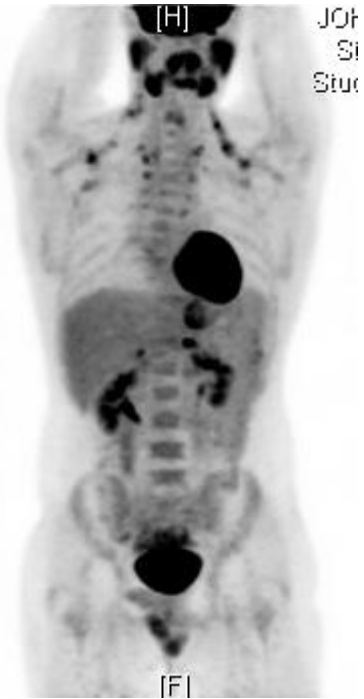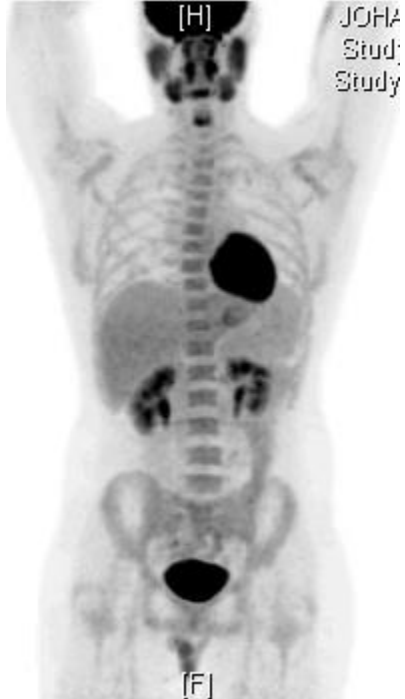

| MRN | Age | IPS | Escalated | Cycles | SUV Ratio | Deauville | SUV | Liver | Response | RT | RT resp | Relapse | PFS | Death | OS | Rel prev site | Bx confirmed |
|-----|-----|-----|-----------|--------|-----------|-----------|-----|-------|----------|----|---------|---------|-----|-------|----|---------------|--------------|
|     | 19  | 2-3 | ABVD      | 6      | >=1.3     | DV-1-3    | 2.8 | 1.9   | CR       | 0  |         | 0       | 40  | 0     | 40 |               |              |

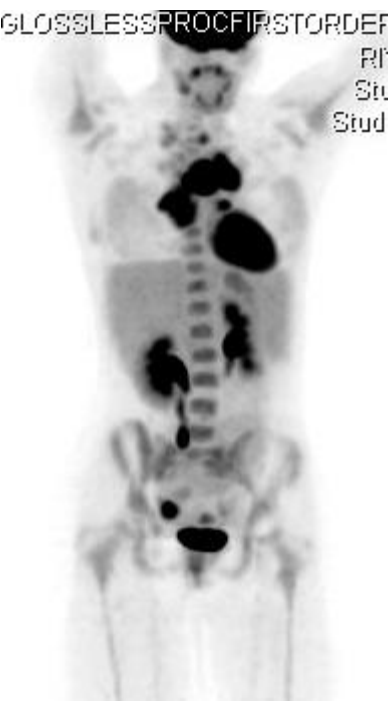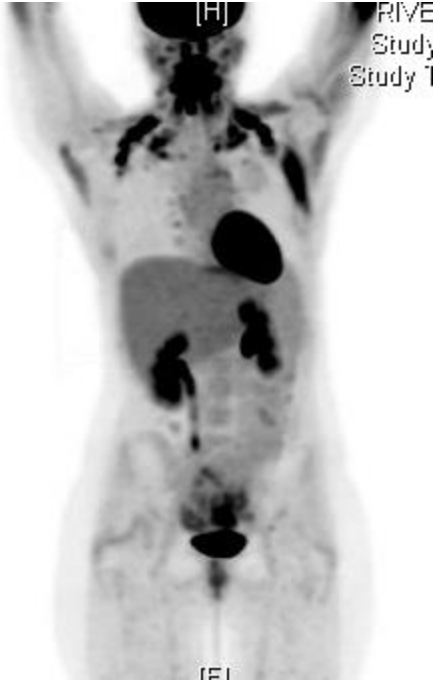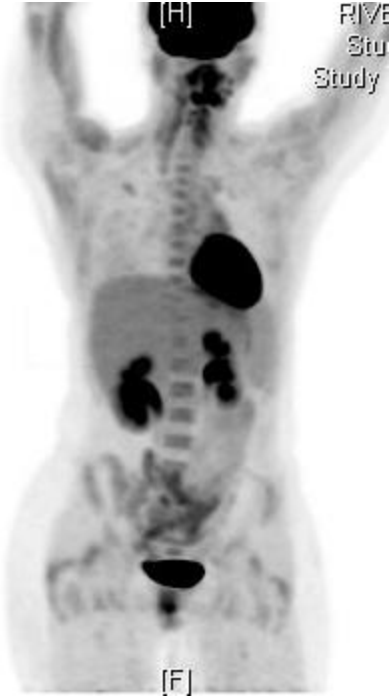

| MRN | Age | IPS | Escalated | Cycles | SUV Ratio | Deauville | SUV | Liver | Response | RT | RT resp | Relapse | PFS | Death | OS | Rel prev site | Bx confirmed |
|-----|-----|-----|-----------|--------|-----------|-----------|-----|-------|----------|----|---------|---------|-----|-------|----|---------------|--------------|
|     | 59  | 4-7 | ABVD      | 6      | >=1.3     | DV-1-3    | 3   | 2.1   | CR       | 0  |         | 0       | 9   | 0     | 9  |               |              |

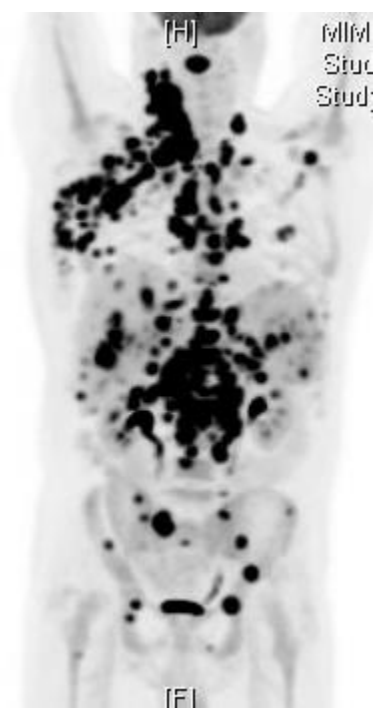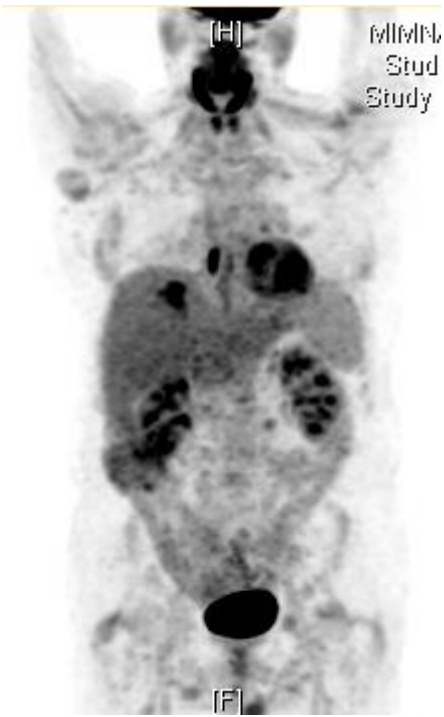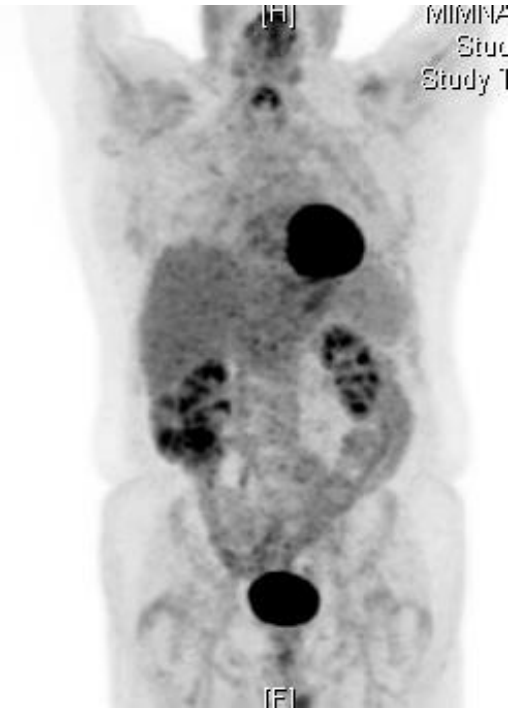

Supplement: s1 [file s1]
