# Supplementary material for: Outcomes of Patients with Positive Interim Positron Emission Tomography (PET) Continuing ABVD in the Clinical Setting
Source: MDPI journal article supplement (doi:10.3390/cancers15061760), 2023-03-14
Supplement: s1 [file s1]

**Supplementary Table S2:** Descriptive statistics by dvPET2 status

| Characteristic            | All           | dvPET2 -            | dvPET2 +            | escBEACOPP†     | p*     |
|---------------------------|---------------|---------------------|---------------------|-----------------|--------|
| No. of patients           | 227           | 170                 | 48                  | 9               |        |
| Median age (range), years | 34<br>[18;87] | 34.0<br>[18.0;87.0] | 37.0<br>[19.0;76.0] | 32.0<br>[19;59] | 0.26   |
| Age ≥ 45                  | 57<br>(25%)   | 46 (23.6%)          | 8 (34.8%)           | 3 (33%)         | 0.36   |
| Female sex                | 115<br>(51%)  | 94 (48.2%)          | 17 (73.9%)          | 4 (44%)         | 0.04   |
| ECOG > 1                  | 6 (3%)        | 5 (2.56%)           | 1 (4.35%)           | 0 (0%)          | 0.49   |
| Ann Arbor Stage           |               |                     |                     |                 | 0.04   |
| II-U                      | 52<br>(23%)   | 42 (21.5%)          | 7 (30.4%)           | 3 (33%)         |        |
| II-X                      | 12 (5%)       | 9 (4.62%)           | 2 (8.70%)           | 1 (11%)         |        |
| III                       | 83<br>(37%)   | 78 (40.0%)          | 3 (13.0%)           | 2 (22%)         |        |
| IV                        | 80<br>(35%)   | 66 (33.8%)          | 11 (47.8%)          | 3 (33%)         |        |
| IPS score                 |               |                     |                     |                 | 0.02   |
| 0-3                       | 201<br>(89%)  | 178<br>(91.3%)      | 17 (73.9%)          | 6 (67%)         |        |
| 4-7                       | 26<br>(12%)   | 17 (8.72%)          | 6 (26.1%)           | 3 (33%)         |        |
| Extranodal Involvement    | 87<br>(38%)   | 72 (36.9%)          | 12 (52.2%)          | 3 (33%)         | 0.23   |
| Response (chemotherapy)   |               |                     |                     |                 |        |
| CR                        | 194<br>(86%)  | 176<br>(90.3%)      | 14 (60.9%)          | 4 (44%)         | <0.001 |
| PR                        | 12 (5%)       | 5 (2.56%)           | 5 (21.7%)           | 2 (22%)         |        |
| POD                       | 19 (8%)       | 13 (6.67%)          | 3 (13.0%)           | 3 (33%)         |        |
| TRM                       | 2 (1%)        | 1 (0.51%)           | 1 (4.35%)           | 0 (0%)          |        |
| Radiotherapy              | 21 (9%)       | 14 (7.18%)          | 3 (13.0%)           | 4 (44%)         | 0.4    |

ECOG, Eastern Cooperative Oncology Group Performance Status; escBEACOPP, escalated bleomycin, etoposide, doxorubicin, cyclophosphamide, vincristine, procarbazine, prednisolone; IPS, International Prognostic Score; PET2, <sup>18</sup>F-fluoro-deoxy-D-glucose positron emission tomography performed after two cycles of adriamycin, bleomycin, vinblastine and dacarbazine. Data presented as N (%) for discrete rates and median [IQR] for numeric values. \*p-values were calculated for the comparison ABVD PET2 positive vs. PET2 negative only. †Data about BEACOPP are presented for reference.
